# Supplementary material
Source: PubMed Central journal article supplement (PMC4464826)
Supplement: NIHMS4689-supplement-Appendix_A__Supplementary_materials.pdf [file NIHMS4689-supplement-Appendix_A__Supplementary_materials.pdf]

## Copy Number Variable MicroRNAs in Schizophrenia and Their Neurodevelopmental Gene Targets

### *Supplemental Information*

|                                                                                                                      |           |
|----------------------------------------------------------------------------------------------------------------------|-----------|
| <b>Supplemental Methods</b> .....                                                                                    | <b>2</b>  |
| Comparison Sample for Formal Analyses .....                                                                          | 2         |
| Genotyping and CNV Determination.....                                                                                | 3         |
| Experimental Validation of CNVs .....                                                                                | 5         |
| Formulae for Logistic Regression Models.....                                                                         | 5         |
| <b>Table S1. Rare CNV miRNA burden in schizophrenia</b> .....                                                        | <b>7</b>  |
| <b>Table S2. MiRNAs overlapped by rare CNVs in schizophrenia case and OPGP comparison subjects</b> .....             | <b>8</b>  |
| <b>Table S3. Predicted target genes of 25 recurrent miRNAs overlapped by rare CNVs in schizophrenia cases</b> .....  | <b>14</b> |
| <b>Table S4. Top 20 functional gene-sets over-represented in recurrent miRNA target genes in schizophrenia</b> ..... | <b>18</b> |
| <b>Table S5. All stringent rare autosomal CNVs in schizophrenia cases and OPGP comparison subjects</b> .....         | <b>20</b> |
| <b>Supplemental References</b> .....                                                                                 | <b>89</b> |

## **Supplemental Methods**

### **Comparison Sample for Formal Analyses**

To optimize our analyses, we used an independent Canadian comparison sample from the Ontario Population Genomics Platform (OPGP) genetic epidemiologic project comprising 415 unrelated adults of European ancestry (1, 2). The OPGP comparison subjects are independent of the 2,357 population-based copy number variant (CNV) adjudication controls described below. The OPGP was conceived as an opportunity to establish a collection of fully consented, Ontario-based population control DNA samples, as a resource for researchers in Ontario and elsewhere. The OPGP was constructed in two phases. The first phase involved collaborations with the Ontario Familial Breast Cancer Registry (OFBCR) (3) and the Ontario Familial Colorectal Cancer Registry (OFCCR) (4). Population controls from the OFBCR and OFCCR that had completed the study questionnaires and provided a blood sample were eligible to participate as controls in the OPGP. The second phase involved collaboration with the Institute of Social Research at York University (Toronto, Ontario, Canada). A database of information on individuals from the population of Ontario ( $n = 14,000$ ) was obtained, based on a random sample of households across Ontario identified initially on the basis of telephone directory listings. These households were contacted by means of a mailed letter and follow-up telephone calls were made by a trained interviewer who, after establishing eligibility within the household, randomly chose one person as the eligible control. Individuals were eligible if they were 20–79 years of age and resided in Ontario. In both the phases, subjects were re-consented for OPGP, and surveyed for comprehensive demographic and health information. Blood samples were collected and sent via courier to The Centre for Applied Genomics (TCAG) Biobanking Facility for transformation, DNA preparation and distribution. The total OPGP collection consists of samples

from 1,134 males (42%) and 1,556 females (58%), ranging in age from 20 to 82 years. This study uses data from 415 of these OPGP samples of European ancestry that were genotyped on the Affymetrix 6.0 platform. To minimize laboratory-related artefacts (5, 6), identical experimental and analytical protocols for array genotyping and CNV analyses were followed at the same facility for the OPGP comparison and schizophrenia case samples (see below).

### **Genotyping and CNV Determination**

High-quality genomic DNA was genotyped using the Affymetrix® Genome-Wide Human SNP Array 6.0 at TCAG in Toronto. Arrays meeting Affymetrix's recommended quality control guideline of contrast QC > 0.4 were used for further analysis as outlined below.

To accurately estimate ancestry, genotypes of the schizophrenia cases from 1,120 genome-wide unlinked single nucleotide polymorphisms (SNPs) were clustered by the program STRUCTURE (7) together with genotypes from 270 HapMap samples, which were used as references of known ancestry during clustering. Ancestries were assigned with a threshold of coefficient of ancestry > 0.9. For this miRNA-CNV study, we considered only schizophrenia cases of European ancestry.

Recent findings of unexpected relatedness in widely used databases (8) prompted a systematic analysis of genetic relatedness to ensure that all cases and comparison individuals were unrelated to each other. Pair-wise identity by descent (IBD) was calculated for every pair of cases from the genotypes of 934,968 SNP probes on the Affymetrix 6.0 platform, using the PLINK toolset (9). Those pairs of samples with PI\_HAT values [defined as  $P(\text{IBD} = 2) + 0.5 \times P(\text{IBD} = 1)$ ] > 0.1, corresponding to first cousins or closer, were further investigated for relatedness and only one sample from each pair was used in the final dataset. The results using

the initial samples tested showed that (i) four subjects in the schizophrenia group were related to other probands (subsequently confirmed by further pedigree data), and (ii) one male OPGP comparison subject was related to another comparison subject. Data for these five individuals were therefore excluded as a preliminary step in compiling the samples of 420 cases of European ancestry and 415 OPGP comparison subjects. Cases and comparison subjects showed a similar pair-wise within-sample background relatedness (median PI\_HAT values of 0.032 and 0.046, respectively, within pre-established ranges of 0.031–0.099).

Genome-wide CNVs were detected using an established multiple-algorithm approach to maximize sensitivity and specificity of CNV calling (1, 2, 10). Briefly, for each subject we defined ‘stringent’ CNV calls as those detected by at least two of three CNV calling algorithms: Birdsuite (11), iPattern (5), and Affymetrix Genotyping Console (GTC), and spanning at least 10 kb in length and five or more consecutive array probes. Of note, our method only implements the GTC algorithm that is responsible for detecting rare variation, and thus we do not use the canary algorithm in GTC that is used for copy number polymorphisms. In our experience, detection of a CNV with two different programs, even when these two methods employ similar underlying algorithms, helps decrease the false positive rate substantially (5). Arrays with number of CNVs exceeding three times the standard deviation from the mean number of CNVs across the dataset were excluded (10).

All subsequent analyses focused on these stringent CNVs, which in our past experience and in this study (see below) have very high positive validation rates by independent methods, e.g., quantitative polymerase chain reaction (qPCR) (1, 10, 12, 13). Each CNV identified in the schizophrenia case and OPGP comparison samples was then adjudicated for rarity by comparison to those identified, using an identical microarray platform and CNV analysis

strategy, in two large population-based control cohorts comprising 2,357 individuals of European ancestry from Ontario and Germany (1, 10). We used a conservative definition of ‘rare’ CNVs: those present in <0.1% of the population controls (1).

### **Experimental Validation of CNVs**

Confirmatory studies of CNVs used Stratagene SYBR® Green based qPCR. Each qPCR assay was performed simultaneously in triplicate for both the test region and a control region of known copy number 2 on chromosome 7 (14). The ratio of the average value for the test region to that for the control region had to be >1.3 or <0.7 in order for the CNV to be confirmed as a duplication or deletion, respectively. In addition, the standard error of the ratio had to be <1.0 on the same scale in order for the assay to be considered reliable. We validated 58 (100.0%) of 58 CNVs tested, i.e., all 58 assays met both of these criteria for CNV confirmation. The validated CNVs spanned a range of sizes, and included 17 that were <50 kb. Post-study molecular genetic results from clinical laboratories confirmed a further 11 CNVs. All clinically significant variants were confirmed in a CLIA-approved laboratory and returned to patients and their families.

### **Formulae for Logistic Regression Models**

Schizophrenia case status (individual) ~ Total collective size (in base pairs) of all rare CNVs in the individual + Presence of a rare CNV overlapping a miRNA in the individual (binary indicator variable).

Schizophrenia case status (individual) ~ Total number of rare CNVs in the individual + Presence of a rare CNV overlapping a miRNA in the individual (binary indicator variable).

Schizophrenia case status (CNV) ~ Rare CNV size (in base pairs) + Presence of a miRNA within the genomic extent of the rare CNV (binary indicator variable).

[All statistical analyses were performed using R 3.0.1 software.]

**Table S1. Rare copy number variant (CNV) miRNA burden in schizophrenia**

|                                                | Schizophrenia Case CNVs           |                   |        |                                   |                   |        | Analysis             |             |               |               |             |               |
|------------------------------------------------|-----------------------------------|-------------------|--------|-----------------------------------|-------------------|--------|----------------------|-------------|---------------|---------------|-------------|---------------|
|                                                |                                   |                   |        |                                   |                   |        | OPGP Comparison CNVs |             |               |               | Uncorrected |               |
|                                                | <i>n</i><br>Overlapping<br>miRNAs | <i>n</i><br>Total | (%)    | <i>n</i><br>Overlapping<br>miRNAs | <i>n</i><br>Total | (%)    | <i>p</i>             | OR          | (95% CI)      | <i>p</i>      | OR          | (95% CI)      |
| All Rare CNVs <sup>b</sup><br>(>10 kb)         | 67                                | 1052              | (6.37) | 25                                | 954               | (2.62) | <b>&lt;0.0001</b>    | <b>2.53</b> | (1.58) (4.04) | <b>0.0189</b> | <b>1.83</b> | (1.12) (3.07) |
| Loss only                                      | 24                                | 591               | (4.06) | 8                                 | 556               | (1.44) | <b>0.0070</b>        | <b>2.90</b> | (1.29) (6.51) | 0.0783        | 2.19        | (0.94) (5.53) |
| Gain only                                      | 43                                | 461               | (9.33) | 17                                | 398               | (4.27) | <b>0.0037</b>        | <b>2.31</b> | (1.29) (4.11) | 0.1071        | 1.66        | (0.91) (3.14) |
| Very rare <sup>c</sup> only                    | 53                                | 740               | (7.16) | 15                                | 593               | (2.53) | <b>0.0001</b>        | <b>2.97</b> | (1.66) (5.33) | <b>0.0150</b> | <b>2.17</b> | (1.19) (4.16) |
| Small Rare CNVs <sup>b</sup><br>(<500 kb only) | 30                                | 842               | (3.56) | 19                                | 885               | (2.15) | 0.0765               | 1.68        | (0.94) (3.02) | 0.0520        | 1.80        | (1.00) (3.32) |
| Very rare <sup>c</sup> only                    | 22                                | 586               | (3.75) | 12                                | 547               | (2.19) | 0.1239               | 1.74        | (0.85) (3.55) | 0.0744        | 1.94        | (0.95) (4.13) |

*n* overlapping miRNAs, number of rare autosomal CNVs overlapping a miRNA; *n* total, total number of rare autosomal CNVs; (Uncorrected) *p*, two-sided Pearson chi-square *p*-value; (Corrected) *p*, two-sided Wald *p*-value; OR, odds ratio; 95% CI, 95% confidence interval of odds ratio.

<sup>a</sup>Corrected = Corrected for CNV size through a logistic regression model including rare CNV size and presence of a miRNA within the genomic extent of the CNV as predictor variables.

<sup>b</sup>Rare = CNVs with <0.1% prevalence in 2,357 population controls of European ancestry (used to adjudicate both schizophrenia case and OPGP comparison subjects).

<sup>c</sup>Very rare = CNVs with 0% prevalence in 2,357 population controls.

Significant results (*p* < 0.05) are shown in bold font.

**Table S2. MiRNAs overlapped by rare copy number variants (CNVs) in schizophrenia case and OPGP comparison subjects**

| CNVs that Overlap miRNAs   |     |             |           |           |           |                                    |                        | miRNA Characteristics |          |                 |                                    |
|----------------------------|-----|-------------|-----------|-----------|-----------|------------------------------------|------------------------|-----------------------|----------|-----------------|------------------------------------|
| Cytoband                   | Chr | Start       | Size (bp) | Gain/Loss | Very Rare | Clinical Significance <sup>a</sup> | # of miRNAs Overlapped | miRNA Name            | miRNA ID | Recurrent miRNA | Has Predicted Targets <sup>b</sup> |
| <b>Schizophrenia Cases</b> |     |             |           |           |           |                                    |                        |                       |          |                 |                                    |
| 9p24.1,9p24.2              | 9   | 4,527,834   | 486,659   | Loss      | ●         | -                                  | 1                      | hsa-miR-101-3p        | 1        |                 | ●                                  |
| 9q21.11,9q21.12            | 9   | 72,107,555  | 964,557   | Loss      | ●         | VUS                                | 2                      | hsa-miR-204-3p, -5p   | 2, 3     |                 | ●                                  |
| 15q13.2,15q13.3            | 15  | 28,608,929  | 1,690,584 | Loss      | ●         | Pathogenic                         | 2                      | hsa-miR-211-3p, -5p   | 4, 5     |                 | ●                                  |
| 4q25,4q26                  | 4   | 113,634,704 | 783,442   | Gain      | ●         | VUS                                | 12                     | hsa-miR-302a-3p, -5p  | 6, 7     |                 | ●                                  |
| 4q25,4q26                  | 4   | 113,634,704 | 783,442   | Gain      | ●         | VUS                                | 12                     | hsa-miR-302b-3p, -5p  | 8, 9     |                 | ●                                  |
| 4q25,4q26                  | 4   | 113,634,704 | 783,442   | Gain      | ●         | VUS                                | 12                     | hsa-miR-302c-3p, -5p  | 10, 11   |                 | ●                                  |
| 4q25,4q26                  | 4   | 113,634,704 | 783,442   | Gain      | ●         | VUS                                | 12                     | hsa-miR-302d-3p, -5p  | 12, 13   |                 | ●                                  |
| 17q25.3                    | 17  | 76,591,190  | 155,319   | Gain      | ●         | -                                  | 7                      | hsa-miR-338-3p, -5p   | 14, 15   |                 | ●                                  |
| 4q25,4q26                  | 4   | 113,634,704 | 783,442   | Gain      | ●         | VUS                                | 12                     | hsa-miR-367-3p, -5p   | 16, 17   |                 | ●                                  |
| 10q26.3                    | 10  | 132,630,798 | 33,495    | Loss      | ●         | -                                  | 1                      | hsa-miR-378c          | 18       |                 | ●                                  |
| 16p13.11                   | 16  | 15,032,942  | 1,388,198 | Gain      |           | VUS                                | 10                     | hsa-miR-484           | 19       | ●               | ●                                  |
| 16p13.11                   | 16  | 14,805,302  | 1,498,712 | Gain      |           | VUS                                | 13                     | hsa-miR-484           | 19       |                 | ●                                  |
| 6q16.2,6q16.3              | 6   | 98,969,135  | 1,408,033 | Gain      | ●         | VUS                                | 1                      | hsa-miR-548ai         | 20       |                 | ●                                  |
| 13q34                      | 13  | 113,835,690 | 228,142   | Gain      | ●         | -                                  | 3                      | hsa-miR-548ar-3p, -5p | 21, 22   |                 |                                    |
| 4p16.1                     | 4   | 9,088,444   | 100,667   | Loss      | ●         | -                                  | 1                      | hsa-miR-548i          | 23       |                 | ●                                  |
| 1q22                       | 1   | 153,569,442 | 260,541   | Gain      | ●         | -                                  | 1                      | hsa-miR-555           | 24       |                 |                                    |
| 3q13.31                    | 3   | 115,308,450 | 2,062,410 | Loss      | ●         | Pathogenic                         | 3                      | hsa-miR-568           | 25       |                 | ●                                  |
| 6p12.3,6p21.1              | 6   | 45,129,193  | 298,662   | Loss      | ●         | -                                  | 1                      | hsa-miR-586           | 26       |                 | ●                                  |
| 8p23.3                     | 8   | 1,667,092   | 91,079    | Gain      | ●         | -                                  | 2                      | hsa-miR-596           | 27       |                 | ●                                  |
| 12q21.31                   | 12  | 79,679,461  | 1,397,367 | Loss      | ●         | VUS                                | 4                      | hsa-miR-617           | 28       | ●               | ●                                  |
| 12q21.31                   | 12  | 79,255,527  | 568,008   | Gain      | ●         | VUS                                | 1                      | hsa-miR-617           | 28       |                 | ●                                  |
| 12q21.31                   | 12  | 79,679,461  | 1,397,367 | Loss      | ●         | VUS                                | 4                      | hsa-miR-618           | 29       |                 | ●                                  |
| 13q31.3                    | 13  | 89,662,891  | 36,164    | Loss      | ●         | -                                  | 1                      | hsa-miR-622           | 30       |                 | ●                                  |



| CNVs that Overlap miRNAs |     |             |           |           |           |                                    |                        | miRNA Characteristics             |          |                 |                                    |
|--------------------------|-----|-------------|-----------|-----------|-----------|------------------------------------|------------------------|-----------------------------------|----------|-----------------|------------------------------------|
| Cytoband                 | Chr | Start       | Size (bp) | Gain/Loss | Very Rare | Clinical Significance <sup>a</sup> | # of miRNAs Overlapped | miRNA Name                        | miRNA ID | Recurrent miRNA | Has Predicted Targets <sup>b</sup> |
| 17q24.2                  | 17  | 61,941,341  | 277,949   | Loss      | ●         | -                                  | 1                      | hsa-miR-634                       | 31       |                 | ●                                  |
| 17q25.3                  | 17  | 76,591,190  | 155,319   | Gain      | ●         | -                                  | 7                      | hsa-miR-657                       | 32       |                 | ●                                  |
| 16p13.3                  | 16  | 725,280     | 113,050   | Gain      |           | -                                  | 1                      | hsa-miR-662                       | 33       |                 | ●                                  |
| 9p21.1                   | 9   | 28,764,737  | 311,232   | Loss      | ●         | -                                  | 4                      | hsa-miR-873-3p, -5p               | 34, 35   |                 | ●                                  |
| 9p21.1                   | 9   | 28,764,737  | 311,232   | Loss      | ●         | -                                  | 4                      | hsa-miR-876-3p, -5p               | 36, 37   |                 | ●                                  |
| 3q29                     | 3   | 198,870,678 | 408,070   | Gain      |           | -                                  | 1                      | hsa-miR-922                       | 38       |                 | ●                                  |
| 17p11.2                  | 17  | 19,070,824  | 130,990   | Gain      |           | -                                  | 2                      | hsa-miR-1180-3p, -5p              | 39, 40   |                 | ●                                  |
| 19p13.3                  | 19  | 2,015,619   | 180,285   | Loss      | ●         | -                                  | 4                      | hsa-miR-1227-3p, -5p              | 41, 42   |                 | ●                                  |
| 4q25,4q26                | 4   | 113,634,704 | 783,442   | Gain      | ●         | VUS                                | 12                     | hsa-miR-1243                      | 43       |                 | ●                                  |
| 17q25.3                  | 17  | 76,591,190  | 155,319   | Gain      | ●         | -                                  | 7                      | hsa-miR-1250-3p, -5p              | 44, 45   |                 |                                    |
| 17p13.3                  | 17  | 2,344,518   | 369,203   | Gain      | ●         | -                                  | 3                      | hsa-miR-1253                      | 46       |                 | ●                                  |
| 3q26.1                   | 3   | 165,337,963 | 63,113    | Gain      | ●         | -                                  | 1                      | hsa-miR-1263                      | 47       |                 | ●                                  |
| 4q34.3,4q35.1            | 4   | 179,878,817 | 4,343,697 | Gain      | ●         | VUS                                | 1                      | hsa-miR-1305                      | 48       |                 | ●                                  |
| 8p23.1                   | 8   | 10,629,211  | 211,817   | Gain      |           | -                                  | 1                      | hsa-miR-1322                      | 49       |                 | ●                                  |
| 16p13.11                 | 16  | 14,805,302  | 1,498,712 | Gain      |           | VUS                                | 13                     | hsa-miR-1972                      | 50       |                 | ●                                  |
| 17q25.3                  | 17  | 76,591,190  | 155,319   | Gain      | ●         | -                                  | 7                      | hsa-miR-3065-3p, -5p              | 51, 52   |                 | ●                                  |
| 4p16.1                   | 4   | 9,480,098   | 283,217   | Gain      |           | -                                  | 1                      | hsa-miR-3138                      | 53       |                 | ●                                  |
| 16p13.11                 | 16  | 15,032,942  | 1,388,198 | Gain      |           | VUS                                | 10                     | hsa-miR-3179                      | 54       | ●               | ●                                  |
| 16p13.11                 | 16  | 14,805,302  | 1,498,712 | Gain      |           | VUS                                | 13                     | hsa-miR-3179                      | 54       |                 | ●                                  |
| 16p13.11                 | 16  | 15,032,942  | 1,388,198 | Gain      |           | VUS                                | 10                     | hsa-miR-3180 <sup>c</sup>         | 55       | ●               | ●                                  |
| 16p13.11                 | 16  | 14,805,302  | 1,498,712 | Gain      |           | VUS                                | 13                     | hsa-miR-3180 <sup>c</sup>         | 55       |                 | ●                                  |
| 16p13.11                 | 16  | 15,032,942  | 1,388,198 | Gain      |           | VUS                                | 10                     | hsa-miR-3180-3p, -5p <sup>c</sup> | 56, 57   | ●               | ●                                  |
| 16p13.11                 | 16  | 14,805,302  | 1,498,712 | Gain      |           | VUS                                | 13                     | hsa-miR-3180-3p, -5p <sup>c</sup> | 56, 57   |                 | ●                                  |
| 22q12.1                  | 22  | 25,696,811  | 1,304,432 | Loss      | ●         | VUS                                | 1                      | hsa-miR-3199                      | 58       |                 | ●                                  |
| 16p13.11                 | 16  | 15,032,942  | 1,388,198 | Gain      |           | VUS                                | 10                     | hsa-miR-3670                      | 59       | ●               | ●                                  |
| 16p13.11                 | 16  | 14,805,302  | 1,498,712 | Gain      |           | VUS                                | 13                     | hsa-miR-3670                      | 59       |                 | ●                                  |

| CNVs that Overlap miRNAs |     |             |           |           |           |                                    |                        | miRNA Characteristics |          |                 |                                    |
|--------------------------|-----|-------------|-----------|-----------|-----------|------------------------------------|------------------------|-----------------------|----------|-----------------|------------------------------------|
| Cytoband                 | Chr | Start       | Size (bp) | Gain/Loss | Very Rare | Clinical Significance <sup>a</sup> | # of miRNAs Overlapped | miRNA Name            | miRNA ID | Recurrent miRNA | Has Predicted Targets <sup>b</sup> |
| 8p23.3                   | 8   | 1,667,092   | 91,079    | Gain      | ●         | -                                  | 2                      | hsa-miR-3674          | 60       |                 | ●                                  |
| 16p11.2                  | 16  | 29,474,810  | 659,635   | Gain      | ●         | Pathogenic                         | 2                      | hsa-miR-3680-3p, -5p  | 61, 62   | ●               |                                    |
| 16p11.2                  | 16  | 29,474,810  | 624,599   | Gain      | ●         | Pathogenic                         | 2                      | hsa-miR-3680-3p, -5p  | 61, 62   |                 |                                    |
| 16p11.2                  | 16  | 29,474,810  | 659,635   | Gain      | ●         | Pathogenic                         | 2                      | hsa-miR-3680-3p, -5p  | 61, 62   |                 |                                    |
| 16p11.2                  | 16  | 29,474,810  | 624,599   | Gain      | ●         | Pathogenic                         | 2                      | hsa-miR-3680-3p, -5p  | 61, 62   |                 |                                    |
| 1p36.31                  | 1   | 6,362,540   | 90,237    | Loss      | ●         | -                                  | 1                      | hsa-miR-4252          | 63       |                 | ●                                  |
| 3p21.31                  | 3   | 49,211,200  | 83,864    | Loss      | ●         | -                                  | 1                      | hsa-miR-4271          | 64       |                 | ●                                  |
| 10q11.22,10q11.23        | 10  | 45,905,767  | 5,423,684 | Gain      | ●         | Pathogenic                         | 1                      | hsa-miR-4294          | 65       |                 | ●                                  |
| 1q43                     | 1   | 235,349,594 | 726,228   | Gain      | ●         | VUS                                | 1                      | hsa-miR-4428          | 66       |                 | ●                                  |
| 2q13                     | 2   | 111,105,101 | 1,727,363 | Gain      | ●         | Pathogenic                         | 2                      | hsa-miR-4435          | 67       | ●               | ●                                  |
| 2q13                     | 2   | 111,105,101 | 1,727,363 | Loss      | ●         | Pathogenic                         | 2                      | hsa-miR-4435          | 67       |                 | ●                                  |
| 2q13                     | 2   | 111,105,101 | 1,727,363 | Gain      | ●         | Pathogenic                         | 2                      | hsa-miR-4435          | 67       |                 | ●                                  |
| 9p13.2,9p13.3            | 9   | 36,173,229  | 862,436   | Loss      | ●         | VUS                                | 3                      | hsa-miR-4475          | 68       |                 | ●                                  |
| 9p13.2,9p13.3            | 9   | 36,173,229  | 862,436   | Loss      | ●         | VUS                                | 3                      | hsa-miR-4476          | 69       |                 | ●                                  |
| 13q12.11                 | 13  | 19,694,803  | 314,310   | Loss      |           | -                                  | 1                      | hsa-miR-4499          | 70       |                 | ●                                  |
| 13q34                    | 13  | 113,835,690 | 228,142   | Gain      | ●         | -                                  | 3                      | hsa-miR-4502          | 71       |                 | ●                                  |
| 14q32.33                 | 14  | 105,268,160 | 652,562   | Loss      |           | Benign                             | 4                      | hsa-miR-4507          | 72       | ●               |                                    |
| 14q32.33                 | 14  | 105,265,522 | 894,996   | Loss      |           | Benign                             | 4                      | hsa-miR-4507          | 72       |                 |                                    |
| 15q11-15q13              | 15  | 21,192,955  | 5,015,049 | Gain      | ●         | Pathogenic                         | 3                      | hsa-miR-4508          | 73       | ●               |                                    |
| 15q11-15q13              | 15  | 21,192,955  | 5,680,224 | Gain      | ●         | Pathogenic                         | 4                      | hsa-miR-4508          | 73       |                 |                                    |
| 15q11-15q13              | 15  | 20,224,763  | 6,498,447 | Gain      | ●         | Pathogenic                         | 4                      | hsa-miR-4508          | 73       |                 |                                    |
| 15q11-15q13              | 15  | 21,192,955  | 5,680,224 | Gain      | ●         | Pathogenic                         | 4                      | hsa-miR-4509          | 74       | ●               | ●                                  |
| 15q11-15q13              | 15  | 20,224,763  | 6,498,447 | Gain      | ●         | Pathogenic                         | 4                      | hsa-miR-4509          | 74       |                 | ●                                  |
| 16p11.2                  | 16  | 28,864,929  | 68,551    | Gain      | ●         | -                                  | 1                      | hsa-miR-4517          | 75       |                 | ●                                  |
| 14q32.33                 | 14  | 105,268,160 | 652,562   | Loss      |           | Benign                             | 4                      | hsa-miR-4537          | 76       | ●               |                                    |
| 14q32.33                 | 14  | 105,265,522 | 894,996   | Loss      |           | Benign                             | 4                      | hsa-miR-4537          | 76       |                 |                                    |

| CNVs that Overlap miRNAs |     |             |           |           |           |                                    |                        | miRNA Characteristics     |          |                 |                                    |
|--------------------------|-----|-------------|-----------|-----------|-----------|------------------------------------|------------------------|---------------------------|----------|-----------------|------------------------------------|
| Cytoband                 | Chr | Start       | Size (bp) | Gain/Loss | Very Rare | Clinical Significance <sup>a</sup> | # of miRNAs Overlapped | miRNA Name                | miRNA ID | Recurrent miRNA | Has Predicted Targets <sup>b</sup> |
| 14q32.33                 | 14  | 105,268,160 | 652,562   | Loss      |           | Benign                             | 4                      | hsa-miR-4538              | 77       | ●               | ●                                  |
| 14q32.33                 | 14  | 105,265,522 | 894,996   | Loss      |           | Benign                             | 4                      | hsa-miR-4538              | 77       |                 | ●                                  |
| 14q32.33                 | 14  | 105,268,160 | 652,562   | Loss      |           | Benign                             | 4                      | hsa-miR-4539              | 78       | ●               | ●                                  |
| 14q32.33                 | 14  | 105,265,522 | 894,996   | Loss      |           | Benign                             | 4                      | hsa-miR-4539              | 78       |                 | ●                                  |
| 9p13.2,9p13.3            | 9   | 36,173,229  | 862,436   | Loss      | ●         | VUS                                | 3                      | hsa-miR-4540              | 79       |                 | ●                                  |
| 1q42.13                  | 1   | 226,673,588 | 109,976   | Gain      | ●         | -                                  | 2                      | hsa-miR-4666a-3p, -5p     | 80, 81   |                 |                                    |
| 12q21.31                 | 12  | 79,679,461  | 1,397,367 | Loss      | ●         | VUS                                | 4                      | hsa-miR-4699-3p, -5p      | 82, 83   |                 | ●                                  |
| 15q11-15q13              | 15  | 21,192,955  | 5,015,049 | Gain      | ●         | Pathogenic                         | 3                      | hsa-miR-4715-3p, -5p      | 84, 85   | ●               | ●                                  |
| 15q11-15q13              | 15  | 21,192,955  | 5,680,224 | Gain      | ●         | Pathogenic                         | 4                      | hsa-miR-4715-3p, -5p      | 84, 85   |                 | ●                                  |
| 15q11-15q13              | 15  | 20,224,763  | 6,498,447 | Gain      | ●         | Pathogenic                         | 4                      | hsa-miR-4715-3p, -5p      | 84, 85   |                 | ●                                  |
| 16p11.2                  | 16  | 28,731,428  | 48,040    | Gain      | ●         | -                                  | 1                      | hsa-miR-4721              | 86       |                 | ●                                  |
| 19q13.42                 | 19  | 59,423,798  | 115,602   | Gain      |           | -                                  | 1                      | hsa-miR-4752              | 87       | ●               | ●                                  |
| 19q13.42                 | 19  | 59,414,087  | 125,313   | Gain      |           | -                                  | 1                      | hsa-miR-4752              | 87       |                 | ●                                  |
| 2q13                     | 2   | 111,105,101 | 1,727,363 | Gain      | ●         | Pathogenic                         | 2                      | hsa-miR-4771 <sup>d</sup> | 88       | ●               | ●                                  |
| 2q13                     | 2   | 111,105,101 | 1,727,363 | Loss      | ●         | Pathogenic                         | 2                      | hsa-miR-4771 <sup>d</sup> | 88       |                 | ●                                  |
| 2q13                     | 2   | 111,105,101 | 1,727,363 | Gain      | ●         | Pathogenic                         | 2                      | hsa-miR-4771 <sup>d</sup> | 88       |                 | ●                                  |
| 2p11.2                   | 2   | 86,959,387  | 373,976   | Loss      | ●         | -                                  | 1                      | hsa-miR-4771 <sup>d</sup> | 88       |                 | ●                                  |
| 3p11.2                   | 3   | 87,330,448  | 27,759    | Gain      | ●         | -                                  | 2                      | hsa-miR-4795-3p, -5p      | 89, 90   |                 | ●                                  |
| 3q13.31                  | 3   | 115,308,450 | 2,062,410 | Loss      | ●         | Pathogenic                         | 3                      | hsa-miR-4796-3p, -5p      | 91, 92   |                 | ●                                  |
| 1q21.1                   | 1   | 144,643,825 | 1,653,983 | Gain      | ●         | Pathogenic                         | 1                      | hsa-miR-5087              | 93       | ●               |                                    |
| 1q21.1                   | 1   | 144,472,163 | 1,839,252 | Gain      | ●         | Pathogenic                         | 1                      | hsa-miR-5087              | 93       |                 |                                    |
| 14q32.33                 | 14  | 106,325,131 | 31,352    | Gain      |           | -                                  | 2                      | hsa-miR-5195-3p, -5p      | 94, 95   |                 |                                    |
| 18q12.2,18q12.3          | 18  | 35,467,011  | 47,425    | Loss      | ●         | -                                  | 2                      | hsa-miR-5583-3p, -5p      | 96, 97   |                 |                                    |
| 10p15.1                  | 10  | 4,018,881   | 155,755   | Gain      | ●         | -                                  | 1                      | hsa-miR-6078              | 98       |                 |                                    |
| 4q33,4q34.1              | 4   | 171,556,613 | 2,693,129 | Loss      | ●         | VUS                                | 1                      | hsa-miR-6082              | 99       |                 |                                    |
| 16p13.11                 | 16  | 15,032,942  | 1,388,198 | Gain      |           | VUS                                | 10                     | hsa-miR-6506-3p, -5p      | 100, 101 | ●               |                                    |

| CNVs that Overlap miRNAs        |     |             |           |           |           |                                    | miRNA Characteristics  |                       |          |                 |                                    |
|---------------------------------|-----|-------------|-----------|-----------|-----------|------------------------------------|------------------------|-----------------------|----------|-----------------|------------------------------------|
| Cytoband                        | Chr | Start       | Size (bp) | Gain/Loss | Very Rare | Clinical Significance <sup>a</sup> | # of miRNAs Overlapped | miRNA Name            | miRNA ID | Recurrent miRNA | Has Predicted Targets <sup>b</sup> |
| 16p13.11                        | 16  | 14,805,302  | 1,498,712 | Gain      |           | VUS                                | 13                     | hsa-miR-6506-3p, -5p  | 100, 101 |                 |                                    |
| 16p13.11                        | 16  | 15,032,942  | 1,388,198 | Gain      |           | VUS                                | 10                     | hsa-miR-6511a-3p, -5p | 102, 103 | ●               |                                    |
| 16p13.11                        | 16  | 14,805,302  | 1,498,712 | Gain      |           | VUS                                | 13                     | hsa-miR-6511a-3p, -5p | 102, 103 |                 |                                    |
| 1q21.1                          | 1   | 143,677,127 | 826,295   | Gain      |           | VUS                                | 2                      | hsa-miR-6736-3p, -5p  | 104, 105 |                 |                                    |
| 1q42.13                         | 1   | 226,634,235 | 54,736    | Gain      | ●         | -                                  | 2                      | hsa-miR-6742-3p, -5p  | 106, 107 |                 |                                    |
| 11p15.5                         | 11  | 196,767     | 70,333    | Gain      | ●         | -                                  | 2                      | hsa-miR-6743-3p, -5p  | 108, 109 |                 |                                    |
| 16p13.11                        | 16  | 14,805,302  | 1,498,712 | Gain      |           | VUS                                | 13                     | hsa-miR-6770-3p, -5p  | 110, 111 |                 |                                    |
| 17p13.3                         | 17  | 2,344,518   | 369,203   | Gain      | ●         | -                                  | 3                      | hsa-miR-6776-3p, -5p  | 112, 113 |                 |                                    |
| 19p13.3                         | 19  | 2,015,619   | 180,285   | Loss      | ●         | -                                  | 4                      | hsa-miR-6789-3p, -5p  | 114, 115 |                 |                                    |
| 3q29                            | 3   | 196,942,560 | 207,524   | Gain      | ●         | -                                  | 2                      | hsa-miR-6829-3p, -5p  | 116, 117 |                 |                                    |
| 20q12                           | 20  | 39,196,466  | 76,741    | Gain      | ●         | -                                  | 2                      | hsa-miR-6871-3p, -5p  | 118, 119 |                 |                                    |
| 2q22.1                          | 2   | 139,898,997 | 1,322,193 | Loss      | ●         | VUS                                | 2                      | hsa-miR-7157-3p, -5p  | 120, 121 |                 |                                    |
| 4q25,4q26                       | 4   | 113,634,704 | 783,442   | Gain      | ●         | VUS                                | 12                     | hsa-miR-8082          | 122      |                 |                                    |
| <b>OPGP Comparison Subjects</b> |     |             |           |           |           |                                    |                        |                       |          |                 |                                    |
| 13q14.3                         | 13  | 49,492,414  | 859,795   | Loss      |           | VUS                                | 4                      | hsa-miR-15a-3p, -5p   | 1, 2     |                 | ●                                  |
| 13q14.3                         | 13  | 49,492,414  | 859,795   | Loss      |           | VUS                                | 4                      | hsa-miR-16-1-3p       | 3        |                 |                                    |
| 13q14.3                         | 13  | 49,492,414  | 859,795   | Loss      |           | VUS                                | 4                      | hsa-miR-16-5p         | 4        |                 | ●                                  |
| 1p36.32                         | 1   | 3,273,162   | 229,215   | Gain      | ●         | -                                  | 1                      | hsa-miR-551a          | 5        |                 | ●                                  |
| 22q11.21                        | 22  | 16,783,629  | 92,319    | Gain      | ●         | -                                  | 1                      | hsa-miR-648           | 6        |                 | ●                                  |
| 22q11.22                        | 22  | 21,279,648  | 273,586   | Loss      |           | -                                  | 1                      | hsa-miR-650           | 7        |                 | ●                                  |
| 16q24.1                         | 16  | 84,327,816  | 21,586    | Loss      |           | -                                  | 2                      | hsa-miR-1910-3p, -5p  | 8, 9     |                 | ●                                  |
| 4q26                            | 4   | 117,070,336 | 916,902   | Gain      | ●         | VUS                                | 1                      | hsa-miR-1973          | 10       |                 | ●                                  |
| 13q12.12                        | 13  | 22,404,072  | 1,430,916 | Loss      |           | VUS                                | 2                      | hsa-miR-2276-3p, -5p  | 11, 12   |                 | ●                                  |
| 14q12                           | 14  | 27,170,503  | 206,013   | Gain      | ●         | -                                  | 1                      | hsa-miR-3171          | 13       |                 |                                    |
| 17p13.3                         | 17  | 659,882     | 395,644   | Loss      | ●         | -                                  | 1                      | hsa-miR-3183          | 14       |                 | ●                                  |

| CNVs that Overlap miRNAs |     |             |           |           |           |                                    |                        | miRNA Characteristics |          |                 |                                    |
|--------------------------|-----|-------------|-----------|-----------|-----------|------------------------------------|------------------------|-----------------------|----------|-----------------|------------------------------------|
| Cytoband                 | Chr | Start       | Size (bp) | Gain/Loss | Very Rare | Clinical Significance <sup>a</sup> | # of miRNAs Overlapped | miRNA Name            | miRNA ID | Recurrent miRNA | Has Predicted Targets <sup>b</sup> |
| 22q13.32,22q13.33        | 22  | 48,117,741  | 353,995   | Gain      |           | -                                  | 2                      | hsa-miR-3667-3p, -5p  | 15, 16   |                 | ●                                  |
| 1p36.32                  | 1   | 2,777,567   | 336,449   | Gain      |           | -                                  | 1                      | hsa-miR-4251          | 17       |                 | ●                                  |
| 4p15.1                   | 4   | 28,348,262  | 126,511   | Loss      | ●         | -                                  | 1                      | hsa-miR-4275          | 18       |                 | ●                                  |
| 10q26.3                  | 10  | 130,363,010 | 1,253,721 | Gain      | ●         | VUS                                | 1                      | hsa-miR-4297          | 19       |                 | ●                                  |
| 1p36.11                  | 1   | 25,180,271  | 415,567   | Gain      |           | -                                  | 1                      | hsa-miR-4425          | 20       |                 | ●                                  |
| 6q24.1                   | 6   | 141,022,503 | 82,261    | Gain      | ●         | -                                  | 1                      | hsa-miR-4465          | 21       |                 |                                    |
| 22q13.32                 | 22  | 47,529,950  | 451,615   | Gain      | ●         | -                                  | 1                      | hsa-miR-4535          | 22       |                 | ●                                  |
| 5p15.33                  | 5   | 1,055,489   | 218,773   | Gain      | ●         | -                                  | 1                      | hsa-miR-4635          | 23       |                 | ●                                  |
| 9q34.3                   | 9   | 138,501,746 | 170,537   | Gain      | ●         | -                                  | 2                      | hsa-miR-4673          | 24       |                 | ●                                  |
| 9q34.3                   | 9   | 138,501,746 | 170,537   | Gain      | ●         | -                                  | 2                      | hsa-miR-4674          | 25       |                 | ●                                  |
| 17q22                    | 17  | 54,590,260  | 262,281   | Gain      |           | -                                  | 1                      | hsa-miR-4729          | 26       |                 | ●                                  |
| 3q26.31                  | 3   | 176,569,482 | 660,159   | Loss      | ●         | VUS                                | 2                      | hsa-miR-4789-3p, -5p  | 27, 28   |                 | ●                                  |
| 8q24.21                  | 8   | 130,932,838 | 258,989   | Gain      |           | -                                  | 1                      | hsa-miR-5194          | 29       |                 |                                    |
| 7q11.21                  | 7   | 63,771,570  | 141,117   | Loss      | ●         | -                                  | 2                      | hsa-miR-6839-3p, -5p  | 30, 31   |                 |                                    |
| 17q12,17q21.1            | 17  | 35,306,091  | 133,190   | Gain      | ●         | -                                  | 2                      | hsa-miR-6884-3p, -5p  | 32, 33   |                 |                                    |
| 1p22.3                   | 1   | 86,476,458  | 204,829   | Gain      | ●         | -                                  | 1                      | hsa-miR-7856-5p       | 34       |                 |                                    |
| 19q13.42                 | 19  | 59,843,208  | 24,896    | Gain      |           | -                                  | 1                      | hsa-miR-8061          | 35       |                 |                                    |

Cytoband, cytogenetic location of CNV; Chr, chromosome number; Start, hg18 (NCBI Build 36.1, March 2006); Size, in base pairs; Gain/loss, type of copy number aberration; Very rare, not found in 2,357 population controls and absent in OPGP comparison subjects (●), see text for details; # of miRNAs, number of miRNAs overlapped by the CNV; Clinical sig., (only applicable to CNVs >500 kb) assessment of clinical significance by two independent clinical cytogenetic laboratory directors as described elsewhere (2); miRNA name, name of miRNA; Count, cumulative count of miRNAs in cases and controls; Recurrent miRNAs, those overlapped by more than one CNV (●); Has predicted targets, at least one target is predicted for the miRNA at the 97th percentile score cut-off (●).

<sup>a</sup>Variants >500 kb were assessed with respect to clinical significance as pathogenic, variants of unknown significance (VUS) or benign (see Methods for details).

<sup>b</sup>The stringency (97th percentile target prediction score and with genes predicted by two of three established tools) and lack of available data for many miRNAs (e.g., those numbered above 5,000), meant that many miRNAs are missing target genes.

<sup>c</sup>As detailed in miRBase, hsa-miR-3180, hsa-miR-3180-3p, and hsa-miR-3180-5p are distinct mature miRNAs.

<sup>d</sup>As detailed in miRBase, hsa-miR-4771 is a mature miRNA located at two different cytobands: 2p11.2 and 2q13.

**Table S3. Predicted target genes of 25<sup>a</sup> recurrent miRNAs overlapped by rare copy number variants (CNVs) in schizophrenia cases**

| Gene             | Cytoband        | Chr | Start       | Size (bp) | OPGP Target Gene | Associated miRNA(s)   |
|------------------|-----------------|-----|-------------|-----------|------------------|-----------------------|
| <i>ABCD4</i>     | 14q24.3         | 14  | 73,822,916  | 16,453    |                  | hsa-miR-3180-5p       |
| <i>ACTR2</i>     | 2p14            | 2   | 65,308,547  | 40,826    | ●                | hsa-miR-3180-5p       |
| <i>ADAM33</i>    | 20p13           | 20  | 3,597,609   | 13,043    |                  | hsa-miR-484           |
| <i>ANAPC7</i>    | 12q24.11        | 12  | 109,296,331 | 29,587    |                  | hsa-miR-484           |
| <i>ANKLE1</i>    | 19p13.11        | 19  | 17,253,567  | 4,795     |                  | hsa-miR-4509          |
| <i>ANKLE2</i>    | 12q24.33        | 12  | 131,813,900 | 34,558    |                  | hsa-miR-4715-3p       |
| <i>API5</i>      | 11p11.2         | 11  | 43,290,253  | 30,384    |                  | hsa-miR-4715-3p       |
| <i>ARID5B</i>    | 10q21.2         | 10  | 63,331,474  | 191,322   |                  | hsa-miR-4715-5p       |
| <i>ARL13B</i>    | 3q11.1          | 3   | 95,181,957  | 72,841    |                  | hsa-miR-3180-5p       |
| <i>ATF3</i>      | 1q32.3          | 1   | 210,854,986 | 4,535     |                  | hsa-miR-4435          |
| <i>ATP1A2</i>    | 1q23.2          | 1   | 158,352,275 | 25,462    |                  | hsa-miR-4715-3p       |
| <i>ATP2B1</i>    | 12q21.3         | 12  | 88,509,177  | 64,618    |                  | hsa-miR-4715-5p       |
| <i>AVL9</i>      | 7p14.3          | 7   | 32,501,846  | 88,199    |                  | hsa-miR-484           |
| <i>BBC3</i>      | 19q13.3-q13.4   | 19  | 52,416,797  | 10,903    |                  | hsa-miR-3180, 3180-3p |
| <i>BUB3</i>      | 10q26           | 10  | 124,904,423 | 10,140    |                  | hsa-miR-3670          |
| <i>C10orf113</i> | 10p12.31        | 10  | 21,454,757  | 20,687    |                  | hsa-miR-484           |
| <i>C10orf2</i>   | 10q24           | 10  | 102,737,957 | 2,816     |                  | hsa-miR-484           |
| <i>C13orf35</i>  | 13q34           | 13  | 112,381,694 | 4,002     |                  | hsa-miR-4509          |
| <i>CACHD1</i>    | 1p31.3          | 1   | 64,709,168  | 220,665   |                  | hsa-miR-3179          |
| <i>CAPRINI</i>   | 11p13           | 11  | 34,030,543  | 46,948    |                  | hsa-miR-4435          |
| <i>CCDC25</i>    | 8p21.1          | 8   | 27,649,651  | 36,326    |                  | hsa-miR-4538          |
| <i>CCDC53</i>    | 12q23.2         | 12  | 100,931,016 | 48,855    |                  | hsa-miR-484           |
| <i>CCDC85C</i>   | 14q32.31        | 14  | 99,051,335  | 88,715    |                  | hsa-miR-3179          |
| <i>CCNT2</i>     | 2q21.3          | 2   | 135,392,894 | 35,695    | ●                | hsa-miR-4715-3p       |
| <i>CD84</i>      | 1q24            | 1   | 158,784,669 | 31,183    |                  | hsa-miR-4435          |
| <i>CERS6</i>     | 2q24.3          | 2   | 169,021,204 | 313,215   |                  | hsa-miR-3180-5p       |
| <i>COL23A1</i>   | 5q35.3          | 5   | 177,598,304 | 351,501   |                  | hsa-miR-4435          |
| <i>CORO2A</i>    | 9q22.3          | 9   | 99,926,876  | 32,888    |                  | hsa-miR-4435          |
| <i>COX10</i>     | 17p12           | 17  | 13,913,647  | 137,609   |                  | hsa-miR-3180-5p       |
| <i>CPEB2</i>     | 4p15.33         | 4   | 14,613,395  | 63,708    | ●                | hsa-miR-4715-5p       |
| <i>CREB3L3</i>   | 19p13.3         | 19  | 4,104,744   | 18,223    |                  | hsa-miR-484           |
| <i>CSRNP2</i>    | 12q13.11-q13.12 | 12  | 49,743,795  | 12,817    |                  | hsa-miR-484           |
| <i>CYB561D1</i>  | 1p13.3          | 1   | 109,838,284 | 2,121     |                  | hsa-miR-484           |
| <i>CYP20A1</i>   | 2q33.2          | 2   | 203,812,030 | 57,847    |                  | hsa-miR-4435          |
| <i>CYP4F22</i>   | 19p13.12        | 19  | 15,497,147  | 26,136    |                  | hsa-miR-3180, 3180-3p |
| <i>DIRAS2</i>    | 9q22.2          | 9   | 92,415,329  | 601       |                  | hsa-miR-3180-5p       |

| Gene            | Cytoband     | Chr | Start       | Size (bp) | OPGP Target Gene | Associated miRNA(s)         |
|-----------------|--------------|-----|-------------|-----------|------------------|-----------------------------|
| <i>DNAJC18</i>  | 5q31.2       | 5   | 138,777,735 | 25,299    |                  | hsa-miR-4435                |
| <i>EFNA3</i>    | 1q21-q22     | 1   | 153,318,041 | 7,603     |                  | hsa-miR-3179                |
| <i>EMX1</i>     | 2p13.2       | 2   | 72,998,489  | 16,103    |                  | hsa-miR-484                 |
| <i>EPAS1</i>    | 2p21-p16     | 2   | 46,378,554  | 86,750    |                  | hsa-miR-4538                |
| <i>EPS8</i>     | 12p12.3      | 12  | 15,665,517  | 61,636    |                  | hsa-miR-4771                |
| <i>ERMN</i>     | 2q24.1       | 2   | 157,886,028 | 6,210     |                  | hsa-miR-4752                |
| <i>ESRRG</i>    | 1q41         | 1   | 214,746,903 | 170,541   |                  | hsa-miR-4539                |
| <i>FAM102B</i>  | 1p13.3       | 1   | 108,904,573 | 74,723    |                  | hsa-miR-3180-5p             |
| <i>FAM115A</i>  | 7q35         | 7   | 143,185,121 | 19,514    |                  | hsa-miR-3180-5p             |
| <i>FAM124B</i>  | 2q36.2       | 2   | 224,952,533 | 22,197    |                  | hsa-miR-4435                |
| <i>FAM60A</i>   | 12p11        | 12  | 31,326,912  | 15,494    |                  | hsa-miR-3179                |
| <i>FAM92A1</i>  | 8q22.1       | 8   | 94,782,051  | 27,651    |                  | hsa-miR-4752                |
| <i>FBXO28</i>   | 1q42.11      | 1   | 222,368,454 | 43,247    |                  | hsa-miR-3180-5p             |
| <i>FGF1</i>     | 5q31         | 5   | 141,955,038 | 18,839    | ●                | hsa-miR-484                 |
| <i>FMOD</i>     | 1q32         | 1   | 201,578,093 | 5,929     |                  | hsa-miR-4752                |
| <i>FUT1</i>     | 19q13.3      | 19  | 53,945,252  | 1,099     |                  | hsa-miR-3180-5p             |
| <i>FXR1</i>     | 3q28         | 3   | 182,113,167 | 63,454    |                  | hsa-miR-3180-5p             |
| <i>GLCC11</i>   | 7p21.3       | 7   | 7,975,506   | 117,188   |                  | hsa-miR-3670                |
| <i>GLT8D2</i>   | 12q          | 12  | 102,907,315 | 30,242    |                  | hsa-miR-4715-5p, 4752       |
| <i>GOLGA6L1</i> | 15q11.2      | 15  | 20,287,700  | 7,943     |                  | hsa-miR-4435                |
| <i>GOLGA6L6</i> | 15q11.2      | 15  | 18,999,510  | 7,528     |                  | hsa-miR-3180, 3180-3p, 4435 |
| <i>GOSR2</i>    | 17q21        | 17  | 42,355,557  | 15,569    |                  | hsa-miR-484                 |
| <i>GSG1</i>     | 12p13.1      | 12  | 13,129,348  | 18,366    |                  | hsa-miR-3180-5p             |
| <i>HECW2</i>    | 2q32.3       | 2   | 196,774,245 | 232,148   |                  | hsa-miR-3180-5p             |
| <i>HK2</i>      | 2p13         | 2   | 74,915,215  | 56,362    |                  | hsa-miR-484                 |
| <i>HRASLS5</i>  | 11q13.2      | 11  | 62,987,578  | 27,505    |                  | hsa-miR-3180-5p             |
| <i>HYPK</i>     | 15q15.3      | 15  | 41,879,911  | 2,151     |                  | hsa-miR-4715-3p             |
| <i>IFNAR1</i>   | 21q22.11     | 21  | 33,619,230  | 30,496    |                  | hsa-miR-484                 |
| <i>IL21R</i>    | 16p11        | 16  | 27,348,893  | 19,213    |                  | hsa-miR-484                 |
| <i>IRF2</i>     | 4q34.1-q35.1 | 4   | 185,546,905 | 40,308    |                  | hsa-miR-3670                |
| <i>ITK</i>      | 5q31-q32     | 5   | 156,540,566 | 71,701    |                  | hsa-miR-4538                |
| <i>JPH1</i>     | 8q21         | 8   | 75,312,011  | 84,067    |                  | hsa-miR-617                 |
| <i>KAL1</i>     | Xp22.32      | X   | 8,461,035   | 199,043   |                  | hsa-miR-3180, 3180-3p       |
| <i>KCNC4</i>    | 1p21         | 1   | 110,555,644 | 21,474    | ●                | hsa-miR-3179                |
| <i>KCNJ3</i>    | 2q24.1       | 2   | 155,263,533 | 155,958   |                  | hsa-miR-3180-5p             |
| <i>KCTD16</i>   | 5q31.3       | 5   | 143,566,470 | 267,401   |                  | hsa-miR-4752                |
| <i>KHDRBS1</i>  | 1p32         | 1   | 32,299,047  | 1         |                  | hsa-miR-4771                |
| <i>KIAA1549</i> | 7q34         | 7   | 138,173,190 | 143,366   |                  | hsa-miR-484                 |

| Gene            | Cytoband      | Chr | Start       | Size (bp) | OPGP Target Gene | Associated miRNA(s)   |
|-----------------|---------------|-----|-------------|-----------|------------------|-----------------------|
| <i>KLK9</i>     | 19q13.41      | 19  | 56,198,178  | 6,438     |                  | hsa-miR-3180, 3180-3p |
| <i>KRTAP5-9</i> | 11q13.5       | 11  | 70,937,351  | 511       |                  | hsa-miR-3179          |
| <i>LAMB3</i>    | 1q32          | 1   | 207,855,238 | 35,675    |                  | hsa-miR-484           |
| <i>LIFR</i>     | 5p13-p12      | 5   | 38,517,453  | 49,054    |                  | hsa-miR-4752          |
| <i>LRRC20</i>   | 10q22.1       | 10  | 71,731,115  | 75,181    |                  | hsa-miR-4771          |
| <i>MAP2K7</i>   | 19p13.3-p13.2 | 19  | 7,874,829   | 8,488     |                  | hsa-miR-3179          |
| <i>MAX</i>      | 14q23         | 14  | 64,542,674  | 96,137    |                  | hsa-miR-4715-5p       |
| <i>MEN1</i>     | 11q13         | 11  | 64,328,381  | 5,777     |                  | hsa-miR-484           |
| <i>MRPL4</i>    | 19p13.2       | 19  | 10,223,929  | 6,486     |                  | hsa-miR-3179          |
| <i>MRPS14</i>   | 1q25.1        | 1   | 173,250,427 | 8,741     |                  | hsa-miR-4752          |
| <i>MYCBP2</i>   | 13q22         | 13  | 76,517,513  | 281,399   |                  | hsa-miR-484           |
| <i>MYO10</i>    | 5p15.1-p14.3  | 5   | 16,719,800  | 269,118   |                  | hsa-miR-4771          |
| <i>NEDD4</i>    | 15q           | 15  | 53,909,386  | 163,660   |                  | hsa-miR-4752          |
| <i>NFIA</i>     | 1p31.3-p31.2  | 1   | 61,315,885  | 377,696   |                  | hsa-miR-4509          |
| <i>NFIX</i>     | 19p13.3       | 19  | 12,967,651  | 94,534    |                  | hsa-miR-3180          |
| <i>NKRF</i>     | Xq24          | X   | 118,607,342 | 14,140    |                  | hsa-miR-4715-5p       |
| <i>NOL9</i>     | 1p36.31       | 1   | 6,508,500   | 28,650    |                  | hsa-miR-484           |
| <i>NQO1</i>     | 16q22.1       | 16  | 68,302,379  | 15,465    |                  | hsa-miR-4752          |
| <i>NTRK2</i>    | 9q22.1        | 9   | 86,475,483  | 350,690   |                  | hsa-miR-4435          |
| <i>ORAI2</i>    | 7q22.1        | 7   | 101,866,408 | 8,097     |                  | hsa-miR-484           |
| <i>PAK2</i>     | 3q29          | 3   | 197,993,914 | 45,760    |                  | hsa-miR-3179          |
| <i>PAX2</i>     | 10q24         | 10  | 102,496,007 | 81,360    |                  | hsa-miR-3180          |
| <i>PIK3R3</i>   | 1p34.1        | 1   | 46,281,931  | 88,281    |                  | hsa-miR-4715-5p       |
| <i>PLCB4</i>    | 20p12         | 20  | 9,236,461   | 171,176   | ●                | hsa-miR-4752          |
| <i>POLD4</i>    | 11q13         | 11  | 66,876,013  | 1,434     |                  | hsa-miR-484           |
| <i>PRPF40A</i>  | 2q23.3        | 2   | 153,221,065 | 61,135    |                  | hsa-miR-4715-3p       |
| <i>PTGER4</i>   | 5p13.1        | 5   | 40,716,852  | 11,386    |                  | hsa-miR-484           |
| <i>RAB28</i>    | 4p15.33       | 4   | 12,979,279  | 115,594   |                  | hsa-miR-4539          |
| <i>RARG</i>     | 12q13         | 12  | 51,891,726  | 15,871    |                  | hsa-miR-3179          |
| <i>RASGRP1</i>  | 15q14         | 15  | 36,570,046  | 74,076    |                  | hsa-miR-3180-5p       |
| <i>RBM15</i>    | 1p13          | 1   | 110,683,550 | 6,950     |                  | hsa-miR-3180-5p       |
| <i>RBM39</i>    | 20q11.22      | 20  | 33,755,816  | 36,395    |                  | hsa-miR-3670          |
| <i>RDH10</i>    | 8q21.11       | 8   | 74,370,078  | 27,748    |                  | hsa-miR-4715-5p       |
| <i>REEP1</i>    | 2p11.2        | 2   | 86,297,733  | 120,978   |                  | hsa-miR-4752          |
| <i>RHOA</i>     | 3p21.3        | 3   | 49,372,645  | 15,382    |                  | hsa-miR-4715-5p       |
| <i>RRAGC</i>    | 1p34          | 1   | 39,077,811  | 20,095    |                  | hsa-miR-3179          |
| <i>RTN3</i>     | 11q13         | 11  | 63,205,684  | 76,566    |                  | hsa-miR-4538          |
| <i>SI00PBP</i>  | 1p35.1        | 1   | 33,064,287  | 29,940    | ●                | hsa-miR-484           |



| Gene            | Cytoband       | Chr | Start       | Size (bp) | OPGP Target Gene | Associated miRNA(s)         |
|-----------------|----------------|-----|-------------|-----------|------------------|-----------------------------|
| <i>SAMD5</i>    | 6q24.3         | 6   | 147,871,757 | 55,529    |                  | hsa-miR-3180-5p             |
| <i>SECISBP2</i> | 9q22.2         | 9   | 91,123,311  | 40,249    |                  | hsa-miR-3180-5p             |
| <i>SIKE1</i>    | 1p13.2         | 1   | 115,118,414 | 6,338     |                  | hsa-miR-4715-3p             |
| <i>SLC20A2</i>  | 8p11.21        | 8   | 42,394,477  | 54,589    | ●                | hsa-miR-484                 |
| <i>SLC39A7</i>  | 6p21.3         | 6   | 33,277,000  | 2,569     |                  | hsa-miR-3180-3p             |
| <i>SMAD4</i>    | 18q21.1        | 18  | 46,827,414  | 31,422    | ●                | hsa-miR-4715-5p             |
| <i>SNN</i>      | 16p13          | 16  | 11,677,416  | 268       |                  | hsa-miR-484                 |
| <i>SNRNP200</i> | 2q11.2         | 2   | 96,304,476  | 30,427    |                  | hsa-miR-484                 |
| <i>SOST</i>     | 17q11.2        | 17  | 39,188,235  | 3,401     |                  | hsa-miR-3180, 3180-3p       |
| <i>SPRY3</i>    | Xq28           | X   | 154,656,727 | 868       |                  | hsa-miR-3179                |
| <i>STK17A</i>   | 7p13           | 7   | 43,589,367  | 41,600    |                  | hsa-miR-4435                |
| <i>SYNGAP1</i>  | 6p21.3         | 6   | 33,496,019  | 31,643    |                  | hsa-miR-3179, 3180, 3180-3p |
| <i>TLX3</i>     | 5q35.1         | 5   | 170,668,974 | 2,235     |                  | hsa-miR-3180, 3180-3p       |
| <i>TMX3</i>     | 18q22          | 18  | 64,495,149  | 38,050    |                  | hsa-miR-4771                |
| <i>TNNI1</i>    | 1q31.3         | 1   | 199,646,078 | 7,467     |                  | hsa-miR-4715-3p             |
| <i>TOPBP1</i>   | 3q22.1         | 3   | 134,802,783 | 59,879    |                  | hsa-miR-484                 |
| <i>TRAT1</i>    | 3q13           | 3   | 110,024,464 | 30,951    |                  | hsa-miR-484                 |
| <i>TRIM48</i>   | 11q11          | 11  | 54,786,319  | 7,072     |                  | hsa-miR-3180, 3180-3p       |
| <i>TRPV2</i>    | 17p11.2        | 17  | 16,261,707  | 19,222    |                  | hsa-miR-4715-3p             |
| <i>TSGA10</i>   | 2q11.2         | 2   | 98,981,091  | 111,244   |                  | hsa-miR-484                 |
| <i>UBE2D2</i>   | 5q31.2         | 5   | 138,921,560 | 65,011    |                  | hsa-miR-3179                |
| <i>UXT</i>      | Xp11.23-p11.22 | X   | 47,396,184  | 7,087     |                  | hsa-miR-484                 |
| <i>VASH2</i>    | 1q32.3         | 1   | 211,191,702 | 36,848    |                  | hsa-miR-4435                |
| <i>VPS13C</i>   | 15q22.2        | 15  | 59,933,947  | 205,919   |                  | hsa-miR-4509                |
| <i>WASL</i>     | 7q31.3         | 7   | 123,111,808 | 64,217    |                  | hsa-miR-4715-3p             |
| <i>WDR47</i>    | 1p13.3         | 1   | 109,315,574 | 52,084    |                  | hsa-miR-4771                |
| <i>WFS1</i>     | 4p16.1         | 4   | 6,330,083   | 25,014    |                  | hsa-miR-484                 |
| <i>XKR4</i>     | 8q12.1         | 8   | 56,177,602  | 421,739   |                  | hsa-miR-4435                |
| <i>XKR6</i>     | 8p23.1         | 8   | 10,792,871  | 303,388   |                  | hsa-miR-3179                |
| <i>XPO4</i>     | 13q11          | 13  | 20,255,860  | 119,018   |                  | hsa-miR-484                 |
| <i>ZNF544</i>   | 19q13.43       | 19  | 63,447,201  | 18,732    |                  | hsa-miR-4715-5p             |
| <i>ZNF732</i>   | 4p16.3         | 4   | 254,887     | 25,058    |                  | hsa-miR-4752                |
| <i>ZZZ3</i>     | 1p31.1         | 1   | 77,803,912  | 67,716    |                  | hsa-miR-4771                |

Gene, putative target gene name; Cytoband, cytogenetic location of gene; Chr, chromosome number; Start, hg18 (NCBI Build 36.1, March 2006); Size, in base pairs; OPGP target gene, also predicted to be targeted by a different miRNA overlapped by a rare CNV in an OPGP comparison subject; Associated miRNA(s), miRNA(s) overlapped by a schizophrenia case CNV that are predicted to target the gene.

<sup>a</sup>10 of the 25 recurrent miRNAs overlapped by rare CNVs in schizophrenia cases did not have any predicted targets at the 97th percentile score cut-off.

**Table S4. Top 20 functional gene-sets over-represented in recurrent miRNA target genes in schizophrenia**

| Gene-set Characteristics |                                                           | Over-representation Analysis |      |          |         |                                                                                                      |                                                                                                                          |
|--------------------------|-----------------------------------------------------------|------------------------------|------|----------|---------|------------------------------------------------------------------------------------------------------|--------------------------------------------------------------------------------------------------------------------------|
| ID                       | Name                                                      | <i>p</i>                     | OR   | (95% CI) |         | SZ Target Genes in Gene-set                                                                          | OPGP Target Genes in Gene-set                                                                                            |
| GO:0031344               | GO: Regulation of cell projection organization            | 0.0015                       | 7.88 | (1.85)   | (46.91) | <i>CAPRINI; ERMN; MYO10; NEDD4; NTRK2; RHOA; TRPV2; WASL</i>                                         | <i>CDC42; TTL; WNT3A</i>                                                                                                 |
| GO:0048812               | GO: Neuron projection morphogenesis                       | 0.0037                       | 3.61 | (1.38)   | (9.64)  | <i>CAPRINI; KALI; LIFR; MYCBP2; MYO10; NEDD4; NTRK2; PAK2; PAX2; RHOA; TRPV2; WASL</i>               | <i>CDC42; FGFR1; HRAS; ITGA9; SEMA6D; SLC11A2; SLIT3; TTL; WEE1; WNT3A</i>                                               |
| GO:0048667               | GO: Cell morphogenesis involved in neuron differentiation | 0.0051                       | 3.65 | (1.33)   | (10.29) | <i>CAPRINI; KALI; MYCBP2; MYO10; NEDD4; NTRK2; PAK2; PAX2; RHOA; TRPV2; WASL</i>                     | <i>CDC42; FGFR1; HRAS; ITGA9; SEMA6D; SLC11A2; SLIT3; TTL; WNT3A</i>                                                     |
| GO:0051402               | GO: Neuron apoptotic process                              | 0.0053                       | 8.72 | (1.53)   | (89.71) | <i>MAP2K7; MAX; NQO1; NTRK2; RHOA; WFS1</i>                                                          | <i>HRAS; SIX4</i>                                                                                                        |
| GO:0070997               | GO: Neuron death                                          | 0.0053                       | 8.72 | (1.53)   | (89.71) | <i>MAP2K7; MAX; NQO1; NTRK2; RHOA; WFS1</i>                                                          | <i>HRAS; SIX4</i>                                                                                                        |
| GO:0031175               | GO: Neuron projection development                         | 0.0061                       | 3.27 | (1.28)   | (8.47)  | <i>CAPRINI; KALI; LIFR; MYCBP2; MYO10; NEDD4; NTRK2; PAK2; PAX2; RHOA; TRPV2; WASL</i>               | <i>CDC42; FGFR1; HRAS; ITGA9; SEMA6D; SLC11A2; SLIT3; TTL; UBE4B; WEE1; WNT3A</i>                                        |
| GO:0032990               | GO: Cell part morphogenesis                               | 0.0061                       | 3.27 | (1.28)   | (8.47)  | <i>CAPRINI; KALI; LIFR; MYCBP2; MYO10; NEDD4; NTRK2; PAK2; PAX2; RHOA; TRPV2; WASL</i>               | <i>CDC42; FGFR1; HRAS; ITGA9; ONECUT2; SEMA6D; SLC11A2; SLIT3; TTL; WEE1; WNT3A</i>                                      |
| GO:0048858               | GO: Cell projection morphogenesis                         | 0.0061                       | 3.27 | (1.28)   | (8.47)  | <i>CAPRINI; KALI; LIFR; MYCBP2; MYO10; NEDD4; NTRK2; PAK2; PAX2; RHOA; TRPV2; WASL</i>               | <i>CDC42; FGFR1; HRAS; ITGA9; ONECUT2; SEMA6D; SLC11A2; SLIT3; TTL; WEE1; WNT3A</i>                                      |
| GO:0022604               | GO: Regulation of cell morphogenesis                      | 0.0096                       | 3.79 | (1.22)   | (12.31) | <i>CAPRINI; ERMN; MYO10; NEDD4; NTRK2; PAX2; PRPF40A; RHOA; TRPV2</i>                                | <i>CDC42SE2; FOXA1; FOXA2; SMAD7; TTL; VEGFA; WNT3A</i>                                                                  |
| GO:0030030               | GO: Cell projection organization                          | 0.0107                       | 2.64 | (1.15)   | (6.00)  | <i>CAPRINI; ERMN; KALI; LIFR; MYCBP2; MYO10; NEDD4; NTRK2; PAK2; PAX2; RHOA; TRPV2; TSGA10; WASL</i> | <i>CDC42; FGFR1; HRAS; IFT20; ITGA9; LPIN1; ONECUT2; PLEKHA1; SEMA6D; SLC11A2; SLIT3; TTL; UBE2B; UBE4B; WEE1; WNT3A</i> |
| GO:0097285               | GO: Cell-type specific apoptotic process                  | 0.0131                       | 3.91 | (1.16)   | (14.01) | <i>BBC3; MAP2K7; MAX; NQO1; NTRK2; PAX2; RHOA; WFS1</i>                                              | <i>DMPK; HRAS; KITLG; LRP6; MYOCD; SIX4</i>                                                                              |
| GO:0010975               | GO: Regulation of neuron projection                       | 0.0157                       | 7.20 | (1.16)   | (76.57) | <i>CAPRINI; NEDD4; NTRK2; RHOA; TRPV2</i>                                                            | <i>TTL; WNT3A</i>                                                                                                        |

| Gene-set Characteristics |                                                                                    | Over-representation Analysis |      |          |         |                                                                  |                                                             |
|--------------------------|------------------------------------------------------------------------------------|------------------------------|------|----------|---------|------------------------------------------------------------------|-------------------------------------------------------------|
| ID                       | Name                                                                               | <i>p</i>                     | OR   | (95% CI) |         | SZ Target Genes in Gene-set                                      | OPGP Target Genes in Gene-set                               |
|                          | development                                                                        |                              |      |          |         |                                                                  |                                                             |
| GO:0031346               | GO: Positive regulation of cell projection organization                            | 0.0157                       | 7.20 | (1.16)   | (76.57) | <i>CAPRINI1; NTRK2; RHOA; TRPV2; WASL</i>                        | <i>CDC42; WNT3A</i>                                         |
| GO:0043523               | GO: Regulation of neuron apoptotic process                                         | 0.0157                       | 7.20 | (1.16)   | (76.57) | <i>MAP2K7; NQO1; NTRK2; RHOA; WFS1</i>                           | <i>HRAS; SIX4</i>                                           |
| GO:1901214               | GO: Regulation of neuron death                                                     | 0.0157                       | 7.20 | (1.16)   | (76.57) | <i>MAP2K7; NQO1; NTRK2; RHOA; WFS1</i>                           | <i>HRAS; SIX4</i>                                           |
| KEGG:HSA04630            | KEGG: JAK-STAT signaling pathway                                                   | 0.0157                       | 7.20 | (1.16)   | (76.57) | <i>IFNARI; IL21R; LIFR; PIK3R3; SPRY3</i>                        | <i>GHR; PIK3R1</i>                                          |
| GO:0007409               | GO: Axonogenesis                                                                   | 0.0159                       | 3.31 | (1.10)   | (10.14) | <i>KALI; MYCBP2; MYO10; NTRK2; PAK2; PAX2; RHOA; TRPV2; WASL</i> | <i>CDC42; FGFR1; HRAS; ITGA9; SEMA6D; SLIT3; TTL; WNT3A</i> |
| GO:0006984               | GO: ER-nucleus signaling pathway                                                   | 0.0181                       | Inf  | (1.16)   | (Inf)   | <i>ATF3; GOSR2; WFS1</i>                                         |                                                             |
| GO:0006987               | GO: Activation of signaling protein activity involved in unfolded protein response | 0.0181                       | Inf  | (1.16)   | (Inf)   | <i>ATF3; GOSR2; WFS1</i>                                         |                                                             |
| GO:0030968               | GO: Endoplasmic reticulum unfolded protein response                                | 0.0181                       | Inf  | (1.16)   | (Inf)   | <i>ATF3; GOSR2; WFS1</i>                                         |                                                             |

ID, gene-set ID; Name, gene-set name; *p*, uncorrected one-sided Fisher's exact test *p*-value; OR, odds ratio; 95% CI, two-sided 95% confidence interval of odds ratio; SZ target genes in gene-set, list of target genes of schizophrenia case miRNAs overlapped by CNVs that are in the gene-set; OPGP target genes in gene-set, list of target genes of OPGP comparison subject miRNAs overlapped by CNVs that are in the gene-set.

**Table S5. All stringent rare autosomal copy number variants (CNVs) in schizophrenia cases and OPGP comparison subjects**

| Sample Status | SampleID | Cytoband | Chr | Start     | End       | Size (bp) | Gain/<br>Loss | Very<br>Rare | Protein-coding Genes in CNV                           | miRNAs in<br>CNV |
|---------------|----------|----------|-----|-----------|-----------|-----------|---------------|--------------|-------------------------------------------------------|------------------|
| Case          | 387      | 1p36.33  | 1   | 696962    | 840550    | 143589    | Gain          | -            |                                                       | -                |
| Case          | 275      | 1p36.33  | 1   | 702408    | 799636    | 97229     | Gain          | -            |                                                       | -                |
| Case          | 293      | 1p36.32  | 1   | 4159621   | 4173702   | 14082     | Loss          | Yes          |                                                       | -                |
| Case          | 273      | 1p36.32  | 1   | 5011917   | 5079679   | 67763     | Loss          | -            |                                                       | -                |
| Case          | 221      | 1p36.31  | 1   | 6362540   | 6452776   | 90237     | Loss          | Yes          | <i>ACOT7; HES2; ESPN; TNFRSF25;</i><br><i>PLEKHG5</i> | hsa-miR-4252     |
| Case          | 67       | 1p36.31  | 1   | 7063417   | 7097083   | 33667     | Loss          | Yes          | <i>CAMTA1</i>                                         | -                |
| Case          | 68       | 1p36.23  | 1   | 7545052   | 7589574   | 44523     | Loss          | Yes          | -                                                     | -                |
| Case          | 245      | 1p36.21  | 1   | 12675790  | 12702845  | 27056     | Loss          | Yes          | <i>AADA3L3</i>                                        | -                |
| Case          | 358      | 1p36.13  | 1   | 16445391  | 16465956  | 20566     | Gain          | -            | <i>FBXO42</i>                                         | -                |
| Case          | 192      | 1p36.13  | 1   | 18449697  | 18478191  | 28495     | Loss          | Yes          | -                                                     | -                |
| Case          | 234      | 1p36.12  | 1   | 21564484  | 21588922  | 24439     | Loss          | -            | -                                                     | -                |
| Case          | 154      | 1p36.12  | 1   | 22193098  | 22209830  | 16733     | Gain          | Yes          | <i>CELA3A</i>                                         | -                |
| Case          | 272      | 1p35.3   | 1   | 28141293  | 28264069  | 122777    | Gain          | -            | <i>SMPDL3B; XKR8; EYA3</i>                            | -                |
| Case          | 358      | 1p33     | 1   | 48438616  | 48566467  | 127852    | Gain          | -            | <i>SLC5A9; SPATA6</i>                                 | -                |
| Case          | 372      | 1p33     | 1   | 48438616  | 48569919  | 131304    | Gain          | -            | <i>SLC5A9; SPATA6</i>                                 | -                |
| Case          | 178      | 1p33     | 1   | 49337980  | 49517287  | 179308    | Loss          | Yes          | <i>AGBL4</i>                                          | -                |
| Case          | 100      | 1p32.3   | 1   | 54875049  | 55055911  | 180863    | Gain          | -            | <i>MROH7; TTC4; PARS2; TTC22; C1orf177</i>            | -                |
| Case          | 330      | 1p32.3   | 1   | 56046861  | 56065730  | 18870     | Loss          | Yes          | -                                                     | -                |
| Case          | 20       | 1p32.2   | 1   | 56496439  | 56532019  | 35581     | Gain          | Yes          | -                                                     | -                |
| Case          | 42       | 1p31.3   | 1   | 65626237  | 65728313  | 102077    | Gain          | Yes          | <i>DNAJC6; LEPROT</i>                                 | -                |
| Case          | 141      | 1p31.1   | 1   | 71150238  | 71194423  | 44186     | Loss          | Yes          | <i>PTGER3</i>                                         | -                |
| Case          | 134      | 1p31.1   | 1   | 71401364  | 71441494  | 40131     | Loss          | Yes          | -                                                     | -                |
| Case          | 104      | 1p31.1   | 1   | 78703526  | 78847601  | 144076    | Gain          | Yes          | <i>PTGFR</i>                                          | -                |
| Case          | 239      | 1p31.1   | 1   | 79076338  | 79109821  | 33484     | Loss          | Yes          | -                                                     | -                |
| Case          | 272      | 1p22.2   | 1   | 91146987  | 91367401  | 220415    | Loss          | Yes          | <i>ZNF644</i>                                         | -                |
| Case          | 57       | 1p21.3   | 1   | 95224514  | 95238190  | 13677     | Loss          | Yes          | -                                                     | -                |
| Case          | 241      | 1p21.1   | 1   | 104023054 | 104041509 | 18456     | Gain          | Yes          | <i>AMY1A; AMY1B; AMY1C</i>                            | -                |
| Case          | 90       | 1p21.1   | 1   | 106356790 | 106385289 | 28500     | Loss          | Yes          | -                                                     | -                |
| Case          | 122      | 1p13.3   | 1   | 107061308 | 107295787 | 234480    | Gain          | Yes          | -                                                     | -                |
| Case          | 97       | 1p13.2   | 1   | 113065764 | 113266981 | 201218    | Gain          | -            | <i>FAM19A3; SLC16A1</i>                               | -                |

| Sample Status | SampleID | Cytoband | Chr | Start     | End       | Size (bp) | Gain/<br>Loss | Very<br>Rare | Protein-coding Genes in CNV                                                                                                                                                                            | miRNAs in<br>CNV                         |
|---------------|----------|----------|-----|-----------|-----------|-----------|---------------|--------------|--------------------------------------------------------------------------------------------------------------------------------------------------------------------------------------------------------|------------------------------------------|
| Case          | 19       | 1p13.2   | 1   | 113111941 | 113527270 | 415330    | Gain          | Yes          | <i>SLC16A1; LRIG2</i>                                                                                                                                                                                  | -                                        |
| Case          | 186      | 1q21.1   | 1   | 142693888 | 142788045 | 94158     | Loss          | Yes          | -                                                                                                                                                                                                      | -                                        |
| Case          | 1        | 1q21.1   | 1   | 143677127 | 144503421 | 826295    | Gain          |              | <i>PDE4DIP; SEC22B; NOTCH2NL; NBPFI2;<br/>LOC100288142; HFE2; TXNIP; POLR3GL;<br/>ANKRD34A; LIXIL; RBM8A; PEX11B;<br/>ITGA10; ANKRD35; PIAS3; NUDT17;<br/>POLR3C; RNF115; CD160; PDZK1;<br/>GPR89A</i> | hsa-miR-6736-<br>5p; hsa-miR-<br>6736-3p |
| Case          | 2        | 1q21.1   | 1   | 144472163 | 146311414 | 1839252   | Gain          | Yes          | <i>PDZK1; GPR89A; GPR89C; NBPFI1;<br/>NBPFI24; PRKAB2; FMO5; CHD1L; BCL9;<br/>ACP6; GJA5; GJA8; GPR89B; NBPFI0;<br/>NBPFI8</i>                                                                         | hsa-miR-5087                             |
| Case          | 3        | 1q21.1   | 1   | 144643825 | 146297807 | 1653983   | Gain          | Yes          | <i>NBPFI1; NBPFI24; PRKAB2; FMO5;<br/>CHD1L; BCL9; ACP6; GJA5; GJA8;<br/>GPR89B; GPR89C; NBPFI0; NBPFI8</i>                                                                                            | hsa-miR-5087                             |
| Case          | 155      | 1q22     | 1   | 153455784 | 153482621 | 26838     | Loss          |              | <i>GBA</i>                                                                                                                                                                                             | -                                        |
| Case          | 193      | 1q22     | 1   | 153569442 | 153829982 | 260541    | Gain          | Yes          | <i>ASHIL</i>                                                                                                                                                                                           | hsa-miR-555                              |
| Case          | 262      | 1q22     | 1   | 153903079 | 153971056 | 67978     | Gain          | Yes          | <i>YYIAP1; DAP3</i>                                                                                                                                                                                    | -                                        |
| Case          | 137      | 1q23.1   | 1   | 156783620 | 156809565 | 25946     | Gain          |              | <i>OR6Y1; OR6P1</i>                                                                                                                                                                                    | -                                        |
| Case          | 389      | 1q23.1   | 1   | 156783620 | 156809565 | 25946     | Gain          |              | <i>OR6Y1; OR6P1</i>                                                                                                                                                                                    | -                                        |
| Case          | 358      | 1q23.3   | 1   | 159763524 | 159778033 | 14510     | Gain          |              | -                                                                                                                                                                                                      | -                                        |
| Case          | 87       | 1q24.3   | 1   | 170223915 | 170271728 | 47814     | Loss          | Yes          | <i>DNM3</i>                                                                                                                                                                                            | -                                        |
| Case          | 309      | 1q25.2   | 1   | 174503844 | 174523252 | 19409     | Loss          | Yes          | -                                                                                                                                                                                                      | -                                        |
| Case          | 345      | 1q31.1   | 1   | 186278904 | 186297294 | 18391     | Gain          | Yes          | -                                                                                                                                                                                                      | -                                        |
| Case          | 48       | 1q31.1   | 1   | 187802307 | 187958633 | 156327    | Gain          | Yes          | -                                                                                                                                                                                                      | -                                        |
| Case          | 116      | 1q31.1   | 1   | 187935945 | 188076795 | 140851    | Gain          | Yes          | -                                                                                                                                                                                                      | -                                        |
| Case          | 254      | 1q31.1   | 1   | 188294792 | 188351607 | 56816     | Gain          | Yes          | <i>FAM5C</i>                                                                                                                                                                                           | -                                        |
| Case          | 288      | 1q31.3   | 1   | 192930118 | 192951366 | 21249     | Loss          | Yes          | -                                                                                                                                                                                                      | -                                        |
| Case          | 355      | 1q31.3   | 1   | 197339345 | 197361255 | 21911     | Loss          | Yes          | -                                                                                                                                                                                                      | -                                        |
| Case          | 104      | 1q41     | 1   | 213914685 | 213979490 | 64806     | Loss          | Yes          | <i>USH2A</i>                                                                                                                                                                                           | -                                        |
| Case          | 147      | 1q41     | 1   | 215772218 | 215898881 | 126664    | Loss          | Yes          | <i>GPATCH2; SPATA17</i>                                                                                                                                                                                | -                                        |
| Case          | 176      | 1q41     | 1   | 217908844 | 217924869 | 16026     | Loss          |              | -                                                                                                                                                                                                      | -                                        |
| Case          | 336      | 1q41     | 1   | 220034440 | 220063361 | 28922     | Gain          | Yes          | -                                                                                                                                                                                                      | -                                        |
| Case          | 328      | 1q42.12  | 1   | 224208405 | 224221291 | 12887     | Loss          | Yes          | -                                                                                                                                                                                                      | -                                        |

| Sample Status | SampleID | Cytoband      | Chr | Start     | End       | Size (bp) | Gain/<br>Loss | Very<br>Rare | Protein-coding Genes in CNV                 | miRNAs in<br>CNV                   |
|---------------|----------|---------------|-----|-----------|-----------|-----------|---------------|--------------|---------------------------------------------|------------------------------------|
| Case          | 69       | 1q42.13       | 1   | 226634235 | 226688970 | 54736     | Gain          | Yes          | <i>TRIM11; TRIM17; HIST3H3</i>              | hsa-miR-6742-5p; hsa-miR-6742-3p   |
| Case          | 70       | 1q42.13       | 1   | 226673588 | 226783563 | 109976    | Gain          | Yes          | <i>HIST3H3; HIST3H2A; HIST3H2BB; RNF187</i> | hsa-miR-4666a-5p; hsa-miR-4666a-3p |
| Case          | 38       | 1q42.2        | 1   | 230150208 | 230271469 | 121262    | Loss          | Yes          | <i>DISC1</i>                                | -                                  |
| Case          | 76       | 1q43          | 1   | 234676838 | 234695332 | 18495     | Gain          | Yes          | -                                           | -                                  |
| Case          | 15       | 1q43          | 1   | 235333993 | 235345777 | 11785     | Loss          |              | -                                           | -                                  |
| Case          | 4        | 1q43          | 1   | 235349594 | 236075821 | 726228    | Gain          | Yes          | <i>RYR2</i>                                 | hsa-miR-4428                       |
| Case          | 159      | 1q43          | 1   | 238952828 | 238970020 | 17193     | Loss          | Yes          | -                                           | -                                  |
| Case          | 237      | 1q43          | 1   | 240552337 | 240997245 | 444909    | Gain          | Yes          | <i>PLD5</i>                                 | -                                  |
| Case          | 217      | 1q43          | 1   | 240774398 | 241191134 | 416737    | Gain          | Yes          | -                                           | -                                  |
| Case          | 91       | 1q43          | 1   | 241230465 | 241359750 | 129286    | Loss          | Yes          | <i>CEP170</i>                               | -                                  |
| Case          | 217      | 1q43          | 1   | 241324686 | 241409849 | 85164     | Gain          | Yes          | <i>CEP170</i>                               | -                                  |
| Case          | 220      | 1q44          | 1   | 244259739 | 244438494 | 178756    | Loss          | Yes          | -                                           | -                                  |
| Case          | 73       | 1q44          | 1   | 244265482 | 244438494 | 173013    | Loss          | Yes          | -                                           | -                                  |
| Case          | 228      | 1q44          | 1   | 244436222 | 244460455 | 24234     | Loss          | Yes          | -                                           | -                                  |
| Case          | 171      | 1q44          | 1   | 244599732 | 244635324 | 35593     | Loss          | Yes          | -                                           | -                                  |
| Case          | 69       | 2p25.3        | 2   | 267995    | 324842    | 56848     | Gain          | Yes          | <i>FAM150B</i>                              | -                                  |
| Case          | 5        | 2p25.3        | 2   | 1377419   | 2122564   | 745146    | Gain          | Yes          | <i>TPO; PXDN; MYTIL</i>                     | -                                  |
| Case          | 10       | 2p25.2        | 2   | 5437827   | 5448907   | 11081     | Loss          | Yes          | -                                           | -                                  |
| Case          | 218      | 2p25.2        | 2   | 5487063   | 5497177   | 10115     | Loss          | Yes          | -                                           | -                                  |
| Case          | 357      | 2p25.1        | 2   | 12602820  | 12613687  | 10868     | Loss          |              | -                                           | -                                  |
| Case          | 348      | 2p25.1        | 2   | 12602820  | 12613687  | 10868     | Loss          |              | -                                           | -                                  |
| Case          | 347      | 2p24.3        | 2   | 13643345  | 13690975  | 47631     | Loss          | Yes          | -                                           | -                                  |
| Case          | 329      | 2p24.2        | 2   | 18439428  | 18464485  | 25058     | Gain          | Yes          | -                                           | -                                  |
| Case          | 335      | 2p24.2        | 2   | 18439428  | 18463108  | 23681     | Gain          | Yes          | -                                           | -                                  |
| Case          | 69       | 2p24.1,2p24.2 | 2   | 19043235  | 19113175  | 69941     | Gain          | Yes          | -                                           | -                                  |
| Case          | 228      | 2p24.1        | 2   | 20237466  | 20265385  | 27920     | Gain          | Yes          | -                                           | -                                  |
| Case          | 181      | 2p24.1        | 2   | 21923738  | 21965449  | 41712     | Loss          |              | -                                           | -                                  |
| Case          | 67       | 2p23.3        | 2   | 25726572  | 25777692  | 51121     | Gain          | Yes          | <i>DTNB</i>                                 | -                                  |
| Case          | 24       | 2p23.3        | 2   | 27614504  | 27637932  | 23429     | Loss          |              | -                                           | -                                  |

| Sample Status | SampleID | Cytoband | Chr | Start    | End      | Size (bp) | Gain/<br>Loss | Very<br>Rare | Protein-coding Genes in CNV          | miRNAs in<br>CNV |
|---------------|----------|----------|-----|----------|----------|-----------|---------------|--------------|--------------------------------------|------------------|
| Case          | 164      | 2p23.2   | 2   | 28901510 | 28934783 | 33274     | Loss          | Yes          | <i>SPDYA; TRMT61B</i>                | -                |
| Case          | 120      | 2p23.1   | 2   | 30668502 | 30704950 | 36449     | Loss          | -            |                                      | -                |
| Case          | 368      | 2p23.1   | 2   | 30668502 | 30702847 | 34346     | Loss          | -            |                                      | -                |
| Case          | 371      | 2p23.1   | 2   | 30668502 | 30702847 | 34346     | Loss          | -            |                                      | -                |
| Case          | 166      | 2p23.1   | 2   | 30668502 | 30702847 | 34346     | Loss          | -            |                                      | -                |
| Case          | 383      | 2p23.1   | 2   | 30668502 | 30702847 | 34346     | Loss          | -            |                                      | -                |
| Case          | 104      | 2p22.3   | 2   | 34048167 | 34115352 | 67186     | Gain          | -            |                                      | -                |
| Case          | 374      | 2p22.3   | 2   | 34048167 | 34115352 | 67186     | Gain          | -            |                                      | -                |
| Case          | 140      | 2p22.3   | 2   | 35246938 | 35331818 | 84881     | Loss          | Yes          |                                      | -                |
| Case          | 268      | 2p22.3   | 2   | 35435011 | 35469179 | 34169     | Loss          | -            |                                      | -                |
| Case          | 134      | 2p22.1   | 2   | 40056009 | 40089349 | 33341     | Loss          | Yes          |                                      | -                |
| Case          | 160      | 2p22.1   | 2   | 40269877 | 40286924 | 17048     | Loss          | -            |                                      | -                |
| Case          | 25       | 2p22.1   | 2   | 40998583 | 41084366 | 85784     | Loss          | Yes          |                                      | -                |
| Case          | 301      | 2p21     | 2   | 42485886 | 42499654 | 13769     | Loss          | -            |                                      | -                |
| Case          | 101      | 2p21     | 2   | 42869223 | 42995273 | 126051    | Loss          | Yes          | <i>HAAO</i>                          | -                |
| Case          | 2        | 2p21     | 2   | 42985931 | 43014684 | 28754     | Loss          | -            |                                      | -                |
| Case          | 103      | 2p16.3   | 2   | 48638975 | 48703509 | 64535     | Loss          | Yes          | <i>STONI; STONI-GTF2A1L; GTF2A1L</i> | -                |
| Case          | 32       | 2p16.3   | 2   | 48891502 | 48927078 | 35577     | Loss          | -            |                                      | -                |
| Case          | 170      | 2p16.3   | 2   | 50337141 | 50355655 | 18515     | Loss          | Yes          |                                      | -                |
| Case          | 292      | 2p16.3   | 2   | 51378529 | 51439625 | 61097     | Loss          | Yes          |                                      | -                |
| Case          | 356      | 2p16.3   | 2   | 51387810 | 51439625 | 51816     | Loss          | Yes          |                                      | -                |
| Case          | 265      | 2p16.3   | 2   | 52253660 | 52437594 | 183935    | Loss          | -            |                                      | -                |
| Case          | 365      | 2p16.2   | 2   | 52831698 | 52852841 | 21144     | Loss          | -            |                                      | -                |
| Case          | 345      | 2p16.2   | 2   | 52831949 | 52852841 | 20893     | Loss          | -            |                                      | -                |
| Case          | 202      | 2p15     | 2   | 61274805 | 61515063 | 240259    | Gain          | Yes          | <i>USP34</i>                         | -                |
| Case          | 66       | 2p15     | 2   | 62049330 | 62085804 | 36475     | Loss          | Yes          | <i>COMMD1</i>                        | -                |
| Case          | 32       | 2p15     | 2   | 62106806 | 62131189 | 24384     | Loss          | Yes          |                                      | -                |
| Case          | 349      | 2p15     | 2   | 62335968 | 62364454 | 28487     | Gain          | Yes          |                                      | -                |
| Case          | 204      | 2p13.2   | 2   | 72657772 | 72949014 | 291243    | Gain          | Yes          | <i>EXOC6B</i>                        | -                |
| Case          | 180      | 2p13.2   | 2   | 73708431 | 73782394 | 73964     | Gain          | -            | <i>NAT8; NAT8B</i>                   | -                |
| Case          | 380      | 2p13.2   | 2   | 73721453 | 73782394 | 60942     | Gain          | -            | <i>NAT8; NAT8B</i>                   | -                |
| Case          | 135      | 2p13.1   | 2   | 75300931 | 75358721 | 57791     | Loss          | -            |                                      | -                |
| Case          | 118      | 2p12     | 2   | 77962425 | 78201385 | 238961    | Gain          | Yes          |                                      | -                |

| Sample Status | SampleID | Cytoband | Chr | Start     | End       | Size (bp) | Gain/<br>Loss | Very<br>Rare | Protein-coding Genes in CNV                                                      | miRNAs in<br>CNV                         |
|---------------|----------|----------|-----|-----------|-----------|-----------|---------------|--------------|----------------------------------------------------------------------------------|------------------------------------------|
| Case          | 121      | 2p11.2   | 2   | 86959387  | 87333362  | 373976    | Loss          | Yes          | <i>RGPD2; RGPD1; PLGLB1; PLGLB2</i>                                              | hsa-miR-4771                             |
| Case          | 171      | 2p11.2   | 2   | 87581007  | 87609093  | 28087     | Gain          | Yes          | -                                                                                | -                                        |
| Case          | 191      | 2p11.2   | 2   | 88078186  | 88111932  | 33747     | Gain          | Yes          | <i>KRCC1</i>                                                                     | -                                        |
| Case          | 271      | 2p11.2   | 2   | 88942380  | 89025931  | 83552     | Loss          | -            | -                                                                                | -                                        |
| Case          | 378      | 2p11.2   | 2   | 89198725  | 89402227  | 203503    | Loss          | -            | -                                                                                | -                                        |
| Case          | 386      | 2p11.2   | 2   | 89254947  | 89332309  | 77363     | Loss          | -            | -                                                                                | -                                        |
| Case          | 171      | 2p11.2   | 2   | 89572001  | 89636366  | 64366     | Gain          | Yes          | -                                                                                | -                                        |
| Case          | 116      | 2p11.1   | 2   | 91285532  | 91651995  | 366464    | Gain          | -            | -                                                                                | -                                        |
| Case          | 6        | 2q11.1   | 2   | 94691614  | 95427385  | 735772    | Gain          | Yes          | <i>TEKT4; MAL; MRPS5; ZNF514; ZNF2;<br/>PROM2; KCNIP3</i>                        | -                                        |
| Case          | 259      | 2q11.2   | 2   | 100472080 | 100792196 | 320117    | Gain          | Yes          | <i>PDCL3</i>                                                                     | -                                        |
| Case          | 155      | 2q11.2   | 2   | 100885342 | 101021766 | 136425    | Gain          | Yes          | <i>NPAS2; RPL31; TBC1D8</i>                                                      | -                                        |
| Case          | 274      | 2q12.1   | 2   | 103357649 | 103431732 | 74084     | Loss          | Yes          | -                                                                                | -                                        |
| Case          | 71       | 2q13     | 2   | 108619802 | 108680810 | 61009     | Loss          | Yes          | <i>LIMS1</i>                                                                     | -                                        |
| Case          | 72       | 2q13     | 2   | 108619802 | 108681384 | 61583     | Loss          | Yes          | <i>LIMS1</i>                                                                     | -                                        |
| Case          | 7        | 2q13     | 2   | 111105101 | 112832463 | 1727363   | Gain          | Yes          | <i>BUB1; ACOXL; BCL2L11; ANAPC1;<br/>MERTK; TMEM87B; FBLN7; ZC3H8;<br/>ZC3H6</i> | hsa-miR-4435;<br>hsa-miR-4771            |
| Case          | 8        | 2q13     | 2   | 111105101 | 112832463 | 1727363   | Loss          | Yes          | <i>BUB1; ACOXL; BCL2L11; ANAPC1;<br/>MERTK; TMEM87B; FBLN7; ZC3H8;<br/>ZC3H6</i> | hsa-miR-4435;<br>hsa-miR-4771            |
| Case          | 9        | 2q13     | 2   | 111105101 | 112832463 | 1727363   | Gain          | Yes          | <i>BUB1; ACOXL; BCL2L11; ANAPC1;<br/>MERTK; TMEM87B; FBLN7; ZC3H8;<br/>ZC3H6</i> | hsa-miR-4435;<br>hsa-miR-4771            |
| Case          | 333      | 2q14.2   | 2   | 119348895 | 119363368 | 14474     | Gain          | Yes          | -                                                                                | -                                        |
| Case          | 13       | 2q14.3   | 2   | 123879663 | 123925928 | 46266     | Gain          | Yes          | -                                                                                | -                                        |
| Case          | 159      | 2q21.1   | 2   | 130580429 | 130874329 | 293901    | Loss          | Yes          | <i>POTEF; CCDC74B; SMPD4; MZT2B;<br/>TUBA3E; CCDC115; IMP4; PTPN18</i>           | -                                        |
| Case          | 233      | 2q21.1   | 2   | 131597549 | 131616341 | 18793     | Gain          | Yes          | <i>PLEKHB2</i>                                                                   | -                                        |
| Case          | 142      | 2q21.2   | 2   | 132920022 | 132944012 | 23991     | Loss          | Yes          | -                                                                                | -                                        |
| Case          | 182      | 2q21.2   | 2   | 133808588 | 133833323 | 24736     | Loss          | -            | -                                                                                | -                                        |
| Case          | 173      | 2q21.3   | 2   | 135535377 | 135563712 | 28336     | Gain          | Yes          | -                                                                                | -                                        |
| Case          | 10       | 2q22.1   | 2   | 139898997 | 141221189 | 1322193   | Loss          | Yes          | <i>LRP1B</i>                                                                     | hsa-miR-7157-<br>5p; hsa-miR-<br>7157-3p |



| Sample Status | SampleID | Cytoband      | Chr | Start     | End       | Size (bp) | Gain/<br>Loss | Very<br>Rare | Protein-coding Genes in CNV | miRNAs in<br>CNV |
|---------------|----------|---------------|-----|-----------|-----------|-----------|---------------|--------------|-----------------------------|------------------|
| Case          | 173      | 2q23.1        | 2   | 148420435 | 148450570 | 30136     | Loss          | Yes          | <i>ORC4</i>                 | -                |
| Case          | 199      | 2q23.3        | 2   | 151539888 | 151760207 | 220320    | Loss          | Yes          | -                           | -                |
| Case          | 114      | 2q24.2        | 2   | 159806778 | 159821751 | 14974     | Loss          | Yes          | <i>WDSUB1</i>               | -                |
| Case          | 90       | 2q24.3        | 2   | 163819989 | 163857985 | 37997     | Loss          | Yes          | -                           | -                |
| Case          | 239      | 2q24.3        | 2   | 167192976 | 167341084 | 148109    | Loss          | Yes          | -                           | -                |
| Case          | 11       | 2q32.1        | 2   | 185043646 | 185834514 | 790869    | Loss          | Yes          | <i>ZNF804A</i>              | -                |
| Case          | 375      | 2q32.1        | 2   | 186556027 | 186656139 | 100113    | Loss          | -            | -                           | -                |
| Case          | 350      | 2q32.1        | 2   | 186597213 | 186704010 | 106798    | Loss          | -            | -                           | -                |
| Case          | 99       | 2q32.1        | 2   | 187760608 | 187850330 | 89723     | Loss          | Yes          | -                           | -                |
| Case          | 140      | 2q32.3        | 2   | 192327732 | 192358419 | 30688     | Loss          | Yes          | -                           | -                |
| Case          | 167      | 2q32.3        | 2   | 193533075 | 193590738 | 57664     | Loss          | Yes          | -                           | -                |
| Case          | 30       | 2q32.3        | 2   | 194002556 | 194135536 | 132981    | Loss          | Yes          | -                           | -                |
| Case          | 274      | 2q32.3        | 2   | 195017216 | 195073830 | 56615     | Loss          | Yes          | -                           | -                |
| Case          | 351      | 2q33.1        | 2   | 200851654 | 200872028 | 20375     | Gain          | Yes          | -                           | -                |
| Case          | 231      | 2q34          | 2   | 209363230 | 209475589 | 112360    | Loss          | Yes          | -                           | -                |
| Case          | 106      | 2q34          | 2   | 215018681 | 215039590 | 20910     | Loss          | Yes          | -                           | -                |
| Case          | 264      | 2q35          | 2   | 215423952 | 215561952 | 138001    | Loss          | Yes          | <i>ABCA12</i>               | -                |
| Case          | 98       | 2q36.3        | 2   | 227070513 | 227152270 | 81758     | Gain          | Yes          | -                           | -                |
| Case          | 180      | 2q36.3        | 2   | 228288707 | 228312405 | 23699     | Gain          | Yes          | -                           | -                |
| Case          | 32       | 2q37.1        | 2   | 231122629 | 231137464 | 14836     | Gain          | Yes          | -                           | -                |
| Case          | 214      | 2q37.1        | 2   | 231122629 | 231137464 | 14836     | Gain          | Yes          | -                           | -                |
| Case          | 117      | 2q37.1        | 2   | 232919954 | 232951904 | 31951     | Gain          | Yes          | <i>ALPP</i>                 | -                |
| Case          | 117      | 2q37.1        | 2   | 232979125 | 233026322 | 47198     | Gain          | -            | <i>ALPPL2</i>               | -                |
| Case          | 213      | 2q37.2        | 2   | 235871664 | 236172371 | 300708    | Gain          | Yes          | <i>AGAP1</i>                | -                |
| Case          | 213      | 2q37.3,2q37.2 | 2   | 236798401 | 237065060 | 266660    | Gain          | Yes          | <i>ASB18; IQCA1</i>         | -                |
| Case          | 313      | 2q37.3        | 2   | 237296232 | 237338319 | 42088     | Loss          | Yes          | -                           | -                |
| Case          | 5        | 2q37.3        | 2   | 240713305 | 240809448 | 96144     | Gain          | Yes          | <i>MYEOV2; OTOS</i>         | -                |
| Case          | 229      | 3p26.3        | 3   | 1950866   | 2013356   | 62491     | Loss          | Yes          | -                           | -                |
| Case          | 351      | 3p26.2        | 3   | 4234661   | 4260881   | 26221     | Loss          | -            | -                           | -                |
| Case          | 25       | 3p26.2        | 3   | 5365237   | 5419070   | 53834     | Loss          | Yes          | -                           | -                |
| Case          | 167      | 3p26.1        | 3   | 6057834   | 6075959   | 18126     | Gain          | Yes          | -                           | -                |
| Case          | 146      | 3p26.1        | 3   | 7058814   | 7094708   | 35895     | Loss          | Yes          | -                           | -                |
| Case          | 150      | 3p25.2        | 3   | 11685471  | 11712485  | 27015     | Loss          | Yes          | -                           | -                |

| Sample Status | SampleID | Cytoband | Chr | Start     | End       | Size (bp) | Gain/<br>Loss | Very<br>Rare | Protein-coding Genes in CNV   | miRNAs in<br>CNV                 |
|---------------|----------|----------|-----|-----------|-----------|-----------|---------------|--------------|-------------------------------|----------------------------------|
| Case          | 188      | 3p25.1   | 3   | 12763838  | 12834867  | 71030     | Loss          |              | <i>TMEM40; CAND2</i>          | -                                |
| Case          | 345      | 3p25.1   | 3   | 13173248  | 13228860  | 55613     | Gain          | Yes          | -                             | -                                |
| Case          | 301      | 3p25.1   | 3   | 13225682  | 13242771  | 17090     | Loss          | Yes          | -                             | -                                |
| Case          | 97       | 3p25.1   | 3   | 13362176  | 13684365  | 322190    | Gain          | Yes          | <i>NUP210; HDAC11; FBLN2</i>  | -                                |
| Case          | 64       | 3p24.3   | 3   | 14986119  | 15005549  | 19431     | Loss          | Yes          | -                             | -                                |
| Case          | 163      | 3p24.3   | 3   | 17340570  | 17710957  | 370388    | Loss          |              | <i>TBC1D5</i>                 | -                                |
| Case          | 274      | 3p24.3   | 3   | 18791540  | 18836148  | 44609     | Loss          | Yes          | -                             | -                                |
| Case          | 85       | 3p24.3   | 3   | 22481868  | 22576901  | 95034     | Loss          | Yes          | -                             | -                                |
| Case          | 136      | 3p24.2   | 3   | 25483068  | 25516762  | 33695     | Gain          | Yes          | -                             | -                                |
| Case          | 184      | 3p24.1   | 3   | 29266793  | 29284867  | 18075     | Gain          | Yes          | -                             | -                                |
| Case          | 100      | 3p22.3   | 3   | 32189820  | 32258301  | 68482     | Gain          | Yes          | <i>CMTM8</i>                  | -                                |
| Case          | 251      | 3p22.3   | 3   | 33226607  | 33261078  | 34472     | Loss          | Yes          | <i>SUSD5</i>                  | -                                |
| Case          | 105      | 3p22.2   | 3   | 36923941  | 36990564  | 66624     | Loss          | Yes          | <i>TRANK1</i>                 | -                                |
| Case          | 116      | 3p22.2   | 3   | 37389502  | 37409687  | 20186     | Gain          | Yes          | -                             | -                                |
| Case          | 94       | 3p22.1   | 3   | 40016813  | 40046964  | 30152     | Gain          | Yes          | -                             | -                                |
| Case          | 38       | 3p21.33  | 3   | 43963029  | 43990672  | 27644     | Gain          | Yes          | -                             | -                                |
| Case          | 125      | 3p21.31  | 3   | 48145112  | 48178638  | 33527     | Gain          | Yes          | <i>CDC25A</i>                 | -                                |
| Case          | 226      | 3p21.31  | 3   | 49211200  | 49295063  | 83864     | Loss          | Yes          | <i>CCDC36; C3orf62; USP4</i>  | hsa-miR-4271                     |
| Case          | 9        | 3p21.31  | 3   | 49382869  | 49443186  | 60318     | Gain          | Yes          | <i>RHOA; TCTA; AMT; NICN1</i> | -                                |
| Case          | 229      | 3p21.31  | 3   | 49783282  | 49802496  | 19215     | Loss          | Yes          | -                             | -                                |
| Case          | 263      | 3p14.2   | 3   | 59680175  | 60996566  | 1316392   | Gain          | Yes          | <i>FHIT</i>                   | -                                |
| Case          | 271      | 3p14.2   | 3   | 60345677  | 60374212  | 28536     | Loss          | Yes          | -                             | -                                |
| Case          | 270      | 3p14.1   | 3   | 68221067  | 68232652  | 11586     | Loss          |              | -                             | -                                |
| Case          | 341      | 3p12.1   | 3   | 83899825  | 84131997  | 232173    | Gain          | Yes          | -                             | -                                |
| Case          | 12       | 3p12.1   | 3   | 83940054  | 84978204  | 1038151   | Loss          |              | -                             | -                                |
| Case          | 286      | 3p11.2   | 3   | 87330448  | 87358206  | 27759     | Gain          | Yes          | -                             | hsa-miR-4795-5p; hsa-miR-4795-3p |
| Case          | 302      | 3q11.2   | 3   | 96236105  | 96358588  | 122484    | Loss          | Yes          | -                             | -                                |
| Case          | 117      | 3q11.2   | 3   | 96525701  | 96563053  | 37353     | Loss          | Yes          | -                             | -                                |
| Case          | 261      | 3q12.1   | 3   | 99822187  | 99852386  | 30200     | Gain          | Yes          | -                             | -                                |
| Case          | 238      | 3q13.13  | 3   | 109883836 | 109909442 | 25607     | Gain          | Yes          | <i>DZIP3</i>                  | -                                |
| Case          | 153      | 3q13.2   | 3   | 114363004 | 114376124 | 13121     | Gain          |              | -                             | -                                |

| Sample Status | SampleID | Cytoband | Chr | Start     | End       | Size (bp) | Gain/<br>Loss | Very<br>Rare | Protein-coding Genes in CNV                        | miRNAs in<br>CNV                                         |
|---------------|----------|----------|-----|-----------|-----------|-----------|---------------|--------------|----------------------------------------------------|----------------------------------------------------------|
| Case          | 13       | 3q13.31  | 3   | 115308450 | 117370859 | 2062410   | Loss          | Yes          | <i>DRD3; ZNF80; TIGIT; ZBTB20; GAP43; LSAMP</i>    | hsa-miR-568;<br>hsa-miR-4796-<br>5p; hsa-miR-<br>4796-3p |
| Case          | 33       | 3q13.31  | 3   | 116782755 | 116794573 | 11819     | Loss          | Yes          | -                                                  | -                                                        |
| Case          | 59       | 3q21.1   | 3   | 123892898 | 124169203 | 276306    | Gain          | Yes          | <i>PARP14; HSPBAP1; DIRC2; SEMA5B</i>              | -                                                        |
| Case          | 59       | 3q21.1   | 3   | 124187728 | 124233107 | 45380     | Gain          | Yes          | -                                                  | -                                                        |
| Case          | 103      | 3q22.3   | 3   | 138510648 | 138525910 | 15263     | Loss          |              | -                                                  | -                                                        |
| Case          | 223      | 3q22.3   | 3   | 139333888 | 139417312 | 83425     | Gain          | Yes          | <i>DBR1; ARMC8</i>                                 | -                                                        |
| Case          | 335      | 3q23     | 3   | 142048537 | 142104536 | 56000     | Loss          | Yes          | -                                                  | -                                                        |
| Case          | 159      | 3q24     | 3   | 145634698 | 145665753 | 31056     | Loss          | Yes          | -                                                  | -                                                        |
| Case          | 179      | 3q25.33  | 3   | 160041996 | 160365625 | 323630    | Gain          | Yes          | <i>IQCJ; IQCJ-SCHIP1</i>                           | -                                                        |
| Case          | 205      | 3q26.1   | 3   | 162177802 | 162200860 | 23059     | Loss          | Yes          | -                                                  | -                                                        |
| Case          | 152      | 3q26.1   | 3   | 163250120 | 163266002 | 15883     | Loss          | Yes          | -                                                  | -                                                        |
| Case          | 388      | 3q26.1   | 3   | 164178597 | 164574615 | 396019    | Loss          |              | -                                                  | -                                                        |
| Case          | 359      | 3q26.1   | 3   | 165144991 | 165194523 | 49533     | Loss          |              | -                                                  | -                                                        |
| Case          | 371      | 3q26.1   | 3   | 165144991 | 165194523 | 49533     | Loss          |              | -                                                  | -                                                        |
| Case          | 336      | 3q26.1   | 3   | 165247925 | 165313958 | 66034     | Gain          | Yes          | -                                                  | -                                                        |
| Case          | 221      | 3q26.1   | 3   | 165337963 | 165401075 | 63113     | Gain          | Yes          | -                                                  | hsa-miR-1263                                             |
| Case          | 311      | 3q26.1   | 3   | 165558892 | 165625128 | 66237     | Loss          | Yes          | -                                                  | -                                                        |
| Case          | 139      | 3q26.1   | 3   | 167268104 | 167427320 | 159217    | Gain          | Yes          | -                                                  | -                                                        |
| Case          | 291      | 3q27.3   | 3   | 187888832 | 187900465 | 11634     | Loss          | Yes          | -                                                  | -                                                        |
| Case          | 139      | 3q28     | 3   | 192518483 | 192546703 | 28221     | Gain          | Yes          | <i>CCDC50</i>                                      | -                                                        |
| Case          | 77       | 3q28     | 3   | 192525996 | 192546703 | 20708     | Gain          | Yes          | <i>CCDC50</i>                                      | -                                                        |
| Case          | 167      | 3q28     | 3   | 193421039 | 193436511 | 15473     | Loss          | Yes          | -                                                  | -                                                        |
| Case          | 268      | 3q29     | 3   | 196942560 | 197150083 | 207524    | Gain          | Yes          | <i>MUC20; MUC4; TNK2</i>                           | hsa-miR-6829-<br>5p; hsa-miR-<br>6829-3p                 |
| Case          | 268      | 3q29     | 3   | 198870678 | 199278747 | 408070    | Gain          |              | <i>KIAA0226; FYTTD1; LRCH3; IQCG; RPL35A; LMLN</i> | hsa-miR-922                                              |
| Case          | 144      | 3q29     | 3   | 199301242 | 199322975 | 21734     | Gain          | Yes          | -                                                  | -                                                        |
| Case          | 234      | 4p16.3   | 4   | 220237    | 269903    | 49667     | Loss          | Yes          | <i>ZNF732</i>                                      | -                                                        |
| Case          | 100      | 4p16.3   | 4   | 2994521   | 3025891   | 31371     | Loss          | Yes          | <i>GRK4</i>                                        | -                                                        |
| Case          | 169      | 4p16.2   | 4   | 3439241   | 3452835   | 13595     | Gain          | Yes          | <i>DOK7</i>                                        | -                                                        |

| Sample Status | SampleID | Cytoband | Chr | Start    | End      | Size (bp) | Gain/<br>Loss | Very<br>Rare | Protein-coding Genes in CNV                                                                                                                                                                                                | miRNAs in<br>CNV |
|---------------|----------|----------|-----|----------|----------|-----------|---------------|--------------|----------------------------------------------------------------------------------------------------------------------------------------------------------------------------------------------------------------------------|------------------|
| Case          | 240      | 4p16.2   | 4   | 3592848  | 3633261  | 40414     | Loss          | Yes          | -                                                                                                                                                                                                                          | -                |
| Case          | 67       | 4p16.1   | 4   | 6177450  | 6189553  | 12104     | Loss          | Yes          | -                                                                                                                                                                                                                          | -                |
| Case          | 246      | 4p16.1   | 4   | 8775443  | 9024929  | 249487    | Loss          |              | <i>USP17L10; USP17L11; USP17L12;<br/>USP17L13; USP17L17; USP17L18;<br/>USP17L19; USP17L20; USP17L21;<br/>USP17L22; USP17L24; USP17L25;<br/>USP17L26; USP17L27; USP17L28;<br/>USP17L29; USP17L30; USP17L5;<br/>USP17L15</i> | -                |
| Case          | 174      | 4p16.1   | 4   | 9088444  | 9189110  | 100667    | Loss          | Yes          | <i>LOC650293</i>                                                                                                                                                                                                           | hsa-miR-548i     |
| Case          | 98       | 4p16.1   | 4   | 9205016  | 9451415  | 246400    | Gain          |              | <i>DRD5; SLC2A9</i>                                                                                                                                                                                                        | -                |
| Case          | 174      | 4p16.1   | 4   | 9241546  | 9307755  | 66210     | Loss          | Yes          | -                                                                                                                                                                                                                          | -                |
| Case          | 98       | 4p16.1   | 4   | 9480098  | 9763314  | 283217    | Gain          |              | <i>SLC2A9; WDR1</i>                                                                                                                                                                                                        | hsa-miR-3138     |
| Case          | 98       | 4p16.1   | 4   | 9847534  | 10116451 | 268918    | Gain          | Yes          | <i>ZNF518B; CLNK</i>                                                                                                                                                                                                       | -                |
| Case          | 274      | 4p15.33  | 4   | 14518911 | 14548584 | 29674     | Loss          | Yes          | -                                                                                                                                                                                                                          | -                |
| Case          | 9        | 4p15.32  | 4   | 15391461 | 15435236 | 43776     | Gain          |              | <i>CD38</i>                                                                                                                                                                                                                | -                |
| Case          | 173      | 4p15.1   | 4   | 32685825 | 32703314 | 17490     | Gain          |              | -                                                                                                                                                                                                                          | -                |
| Case          | 264      | 4p15.1   | 4   | 32879712 | 32899850 | 20139     | Gain          | Yes          | -                                                                                                                                                                                                                          | -                |
| Case          | 115      | 4p15.1   | 4   | 33697640 | 33730673 | 33034     | Loss          | Yes          | -                                                                                                                                                                                                                          | -                |
| Case          | 299      | 4p15.1   | 4   | 33697640 | 33743900 | 46261     | Loss          | Yes          | -                                                                                                                                                                                                                          | -                |
| Case          | 314      | 4p14     | 4   | 38140013 | 38213466 | 73454     | Loss          | Yes          | -                                                                                                                                                                                                                          | -                |
| Case          | 337      | 4p14     | 4   | 38140888 | 38213466 | 72579     | Loss          | Yes          | -                                                                                                                                                                                                                          | -                |
| Case          | 173      | 4p13     | 4   | 42422451 | 42435421 | 12971     | Loss          |              | -                                                                                                                                                                                                                          | -                |
| Case          | 340      | 4p13     | 4   | 43862525 | 43881584 | 19060     | Loss          |              | <i>KCTD8</i>                                                                                                                                                                                                               | -                |
| Case          | 298      | 4p13     | 4   | 44621177 | 44633944 | 12768     | Loss          | Yes          | -                                                                                                                                                                                                                          | -                |
| Case          | 248      | 4q12     | 4   | 58332338 | 58368150 | 35813     | Loss          | Yes          | -                                                                                                                                                                                                                          | -                |
| Case          | 57       | 4q12     | 4   | 58444799 | 58455569 | 10771     | Loss          | Yes          | -                                                                                                                                                                                                                          | -                |
| Case          | 99       | 4q13.1   | 4   | 59207348 | 59249408 | 42061     | Gain          | Yes          | -                                                                                                                                                                                                                          | -                |
| Case          | 214      | 4q13.1   | 4   | 60068549 | 60229014 | 160466    | Gain          | Yes          | -                                                                                                                                                                                                                          | -                |
| Case          | 321      | 4q13.1   | 4   | 60766822 | 60793824 | 27003     | Loss          | Yes          | -                                                                                                                                                                                                                          | -                |
| Case          | 229      | 4q13.1   | 4   | 64334768 | 64376535 | 41768     | Gain          | Yes          | -                                                                                                                                                                                                                          | -                |
| Case          | 194      | 4q13.2   | 4   | 69707310 | 69751804 | 44495     | Gain          | Yes          | <i>UGT2B10</i>                                                                                                                                                                                                             | -                |
| Case          | 303      | 4q13.3   | 4   | 70517631 | 70551260 | 33630     | Loss          |              | <i>UGT2A1; UGT2A2</i>                                                                                                                                                                                                      | -                |
| Case          | 189      | 4q13.3   | 4   | 73223254 | 73342908 | 119655    | Loss          | Yes          | <i>NPF2FR2</i>                                                                                                                                                                                                             | -                |

| Sample Status | SampleID | Cytoband     | Chr | Start     | End       | Size (bp) | Gain/<br>Loss | Very<br>Rare | Protein-coding Genes in CNV          | miRNAs in<br>CNV                                                                                                                                                                                   |
|---------------|----------|--------------|-----|-----------|-----------|-----------|---------------|--------------|--------------------------------------|----------------------------------------------------------------------------------------------------------------------------------------------------------------------------------------------------|
| Case          | 209      | 4q21.21      | 4   | 80797572  | 80889069  | 91498     | Loss          | -            |                                      | -                                                                                                                                                                                                  |
| Case          | 147      | 4q21.21      | 4   | 81920021  | 81957683  | 37663     | Loss          | Yes          |                                      | -                                                                                                                                                                                                  |
| Case          | 166      | 4q22.2       | 4   | 94085769  | 94141894  | 56126     | Loss          | Yes          |                                      | -                                                                                                                                                                                                  |
| Case          | 250      | 4q22.3       | 4   | 98740286  | 98830743  | 90458     | Loss          | Yes          |                                      | -                                                                                                                                                                                                  |
| Case          | 392      | 4q23         | 4   | 101181475 | 101219547 | 38073     | Loss          | -            |                                      | -                                                                                                                                                                                                  |
| Case          | 156      | 4q24         | 4   | 104426263 | 104467383 | 41121     | Loss          | -            |                                      | -                                                                                                                                                                                                  |
| Case          | 382      | 4q24         | 4   | 106681139 | 106720873 | 39735     | Loss          | -            | <i>ARHGEF38</i>                      | -                                                                                                                                                                                                  |
| Case          | 385      | 4q24         | 4   | 107505499 | 107604385 | 98887     | Gain          | -            | <i>GIMD1</i>                         | -                                                                                                                                                                                                  |
| Case          | 99       | 4q25         | 4   | 108846299 | 108989697 | 143399    | Gain          | Yes          | <i>PAPSSI</i>                        | -                                                                                                                                                                                                  |
|               |          |              |     |           |           |           |               |              |                                      | hsa-miR-367-5p; hsa-miR-367-3p; hsa-miR-302d-5p; hsa-miR-302d-3p; hsa-miR-302a-5p; hsa-miR-302a-3p; hsa-miR-302c-5p; hsa-miR-302c-3p; hsa-miR-302b-5p; hsa-miR-302b-3p; hsa-miR-1243; hsa-miR-8082 |
| Case          | 14       | 4q26, 4q25   | 4   | 113634704 | 114418145 | 783442    | Gain          | Yes          | <i>NEUROG2; C4orf21; LARP7; ANK2</i> | -                                                                                                                                                                                                  |
| Case          | 146      | 4q26         | 4   | 118343468 | 118752337 | 408870    | Gain          | Yes          |                                      | -                                                                                                                                                                                                  |
| Case          | 198      | 4q27, 4q28.1 | 4   | 123980237 | 124038240 | 58004     | Loss          | Yes          | <i>FGF2; NUDT6</i>                   | -                                                                                                                                                                                                  |
| Case          | 339      | 4q28.2       | 4   | 129993331 | 130153430 | 160100    | Gain          | -            | <i>PHF17; SCLT1</i>                  | -                                                                                                                                                                                                  |
| Case          | 185      | 4q28.2       | 4   | 129997526 | 130153430 | 155905    | Gain          | -            | <i>PHF17; SCLT1</i>                  | -                                                                                                                                                                                                  |
| Case          | 324      | 4q28.2       | 4   | 130986341 | 131009827 | 23487     | Loss          | Yes          |                                      | -                                                                                                                                                                                                  |
| Case          | 155      | 4q28.2       | 4   | 131182407 | 131223832 | 41426     | Loss          | Yes          |                                      | -                                                                                                                                                                                                  |
| Case          | 157      | 4q28.3       | 4   | 137654860 | 137693505 | 38646     | Loss          | Yes          |                                      | -                                                                                                                                                                                                  |
| Case          | 310      | 4q31.21      | 4   | 144923049 | 144938257 | 15209     | Gain          | Yes          |                                      | -                                                                                                                                                                                                  |
| Case          | 107      | 4q32.1       | 4   | 155804217 | 155904959 | 100743    | Loss          | Yes          | <i>LRAT</i>                          | -                                                                                                                                                                                                  |

| Sample Status | SampleID | Cytoband            | Chr | Start     | End       | Size (bp) | Gain/<br>Loss | Very<br>Rare | Protein-coding Genes in CNV                                                                                 | miRNAs in<br>CNV |
|---------------|----------|---------------------|-----|-----------|-----------|-----------|---------------|--------------|-------------------------------------------------------------------------------------------------------------|------------------|
| Case          | 42       | 4q32.1              | 4   | 156913775 | 157169828 | 256054    | Gain          | Yes          | <i>GUCY1B3; ASIC5; TDO2; CTSO</i>                                                                           | -                |
| Case          | 351      | 4q32.1              | 4   | 160923945 | 161069584 | 145640    | Gain          | Yes          | -                                                                                                           | -                |
| Case          | 175      | 4q32.2              | 4   | 161729790 | 161817817 | 88028     | Loss          | Yes          | -                                                                                                           | -                |
| Case          | 88       | 4q33                | 4   | 171481893 | 171513411 | 31519     | Gain          | Yes          | -                                                                                                           | -                |
| Case          | 15       | 4q33, 4q34.1        | 4   | 171556613 | 174249741 | 2693129   | Loss          | Yes          | <i>GALNTL6</i>                                                                                              | hsa-miR-6082     |
| Case          | 94       | 4q34.1              | 4   | 173073090 | 173099352 | 26263     | Loss          |              | -                                                                                                           | -                |
| Case          | 16       | 4q35.1,4q34.3       | 4   | 179878817 | 184222513 | 4343697   | Gain          | Yes          | <i>TENM3; DCTD</i>                                                                                          | hsa-miR-1305     |
| Case          | 81       | 4q34.3              | 4   | 181414070 | 181507983 | 93914     | Loss          | Yes          | -                                                                                                           | -                |
| Case          | 274      | 4q34.3              | 4   | 181540506 | 181565740 | 25235     | Loss          | Yes          | -                                                                                                           | -                |
| Case          | 10       | 4q34.3              | 4   | 181771567 | 181895178 | 123612    | Loss          | Yes          | -                                                                                                           | -                |
| Case          | 193      | 4q35.2              | 4   | 189106355 | 189297604 | 191250    | Loss          |              | <i>ZFP42; TRIML2</i>                                                                                        | -                |
| Case          | 325      | 4q35.2              | 4   | 189193113 | 189203823 | 10711     | Loss          | Yes          | -                                                                                                           | -                |
| Case          | 360      | 4q35.2              | 4   | 191154279 | 191261904 | 107626    | Gain          |              | <i>FRG2; LOC100288255; DUX4; DUX4L2;<br/>DUX4L3; DUX4L4; DUX4L5; DUX4L6;<br/>DUX2; DUX4L7; LOC100653046</i> | -                |
| Case          | 237      | 5p15.33             | 5   | 172787    | 214394    | 41608     | Loss          | Yes          | <i>PLEKHG4B</i>                                                                                             | -                |
| Case          | 263      | 5p15.33             | 5   | 854765    | 886628    | 31864     | Loss          |              | <i>ZDHHC11</i>                                                                                              | -                |
| Case          | 17       | 5p15.33,<br>5p15.32 | 5   | 1864574   | 5552004   | 3687431   | Loss          | Yes          | <i>NDUFS6; IRX4; IRX2; C5orf38; IRX1;<br/>ADAMTS16; KIAA0947</i>                                            | -                |
| Case          | 331      | 5p15.2              | 5   | 14068779  | 14105748  | 36970     | Gain          |              | -                                                                                                           | -                |
| Case          | 18       | 5p15.1              | 5   | 15134588  | 15763580  | 628993    | Gain          | Yes          | <i>FBXL7</i>                                                                                                | -                |
| Case          | 18       | 5p15.1              | 5   | 15791497  | 15921897  | 130401    | Gain          | Yes          | -                                                                                                           | -                |
| Case          | 301      | 5p15.1              | 5   | 17695853  | 17734268  | 38416     | Loss          |              | -                                                                                                           | -                |
| Case          | 178      | 5p14.3              | 5   | 19051850  | 19137362  | 85513     | Loss          |              | -                                                                                                           | -                |
| Case          | 236      | 5p14.3              | 5   | 19904337  | 19991689  | 87353     | Loss          | Yes          | -                                                                                                           | -                |
| Case          | 344      | 5p14.3              | 5   | 20460899  | 20473534  | 12636     | Gain          |              | -                                                                                                           | -                |
| Case          | 41       | 5p14.3              | 5   | 21885181  | 22025313  | 140133    | Loss          | Yes          | <i>CDH12</i>                                                                                                | -                |
| Case          | 385      | 5p14.3              | 5   | 22615789  | 22764291  | 148503    | Loss          |              | -                                                                                                           | -                |
| Case          | 211      | 5p14.1              | 5   | 28841774  | 28877422  | 35649     | Loss          | Yes          | -                                                                                                           | -                |
| Case          | 271      | 5p13.3              | 5   | 30853465  | 30867734  | 14270     | Loss          | Yes          | -                                                                                                           | -                |
| Case          | 176      | 5p13.3              | 5   | 31496174  | 31540028  | 43855     | Gain          | Yes          | <i>DROSHA</i>                                                                                               | -                |
| Case          | 87       | 5p13.3              | 5   | 31848970  | 31863182  | 14213     | Loss          | Yes          | -                                                                                                           | -                |
| Case          | 52       | 5p13.3              | 5   | 32650075  | 32758256  | 108182    | Gain          | Yes          | <i>NPR3</i>                                                                                                 | -                |

| Sample Status | SampleID | Cytoband          | Chr | Start     | End       | Size (bp) | Gain/<br>Loss | Very<br>Rare | Protein-coding Genes in CNV                                                                                                                   | miRNAs in<br>CNV |
|---------------|----------|-------------------|-----|-----------|-----------|-----------|---------------|--------------|-----------------------------------------------------------------------------------------------------------------------------------------------|------------------|
| Case          | 257      | 5p13.2            | 5   | 35058791  | 35130051  | 71261     | Gain          | Yes          | <i>AGXT2; PRLR</i>                                                                                                                            | -                |
| Case          | 19       | 5p13.2            | 5   | 37294917  | 37815266  | 520350    | Gain          |              | <i>NUP155; WDR70</i>                                                                                                                          | -                |
| Case          | 180      | 5p12              | 5   | 45120197  | 45260142  | 139946    | Gain          | Yes          | -                                                                                                                                             | -                |
| Case          | 123      | 5q11.2            | 5   | 55242804  | 55254433  | 11630     | Loss          | Yes          | <i>IL31RA</i>                                                                                                                                 | -                |
| Case          | 165      | 5q11.2            | 5   | 57267432  | 57288846  | 21415     | Gain          | Yes          | -                                                                                                                                             | -                |
| Case          | 20       | 5q14.1,<br>5q13.3 | 5   | 74706210  | 77470646  | 2764437   | Gain          | Yes          | <i>COL4A3BP; POLK; ANKDD1B; POC5;<br/>SV2C; IQGAP2; F2RL2; F2R; F2RL1;<br/>SI00Z; CRHBP; AGGF1; ZBED3; PDE8B;<br/>WDR41; OTP; TBCA; AP3B1</i> | -                |
| Case          | 8        | 5q13.3            | 5   | 74982274  | 75021366  | 39093     | Loss          | Yes          | <i>ANKDD1B; POC5</i>                                                                                                                          | -                |
| Case          | 145      | 5q13.3            | 5   | 75467195  | 75486315  | 19121     | Gain          |              | -                                                                                                                                             | -                |
| Case          | 17       | 5q13.3            | 5   | 75467195  | 75486315  | 19121     | Gain          |              | -                                                                                                                                             | -                |
| Case          | 81       | 5q14.2            | 5   | 81927571  | 82055764  | 128194    | Loss          | Yes          | -                                                                                                                                             | -                |
| Case          | 285      | 5q14.3            | 5   | 82914275  | 82957006  | 42732     | Loss          | Yes          | -                                                                                                                                             | -                |
| Case          | 239      | 5q14.3            | 5   | 85988420  | 86039926  | 51507     | Loss          | Yes          | -                                                                                                                                             | -                |
| Case          | 54       | 5q15              | 5   | 93663089  | 93717035  | 53947     | Loss          | Yes          | -                                                                                                                                             | -                |
| Case          | 18       | 5q21.1            | 5   | 99559429  | 99644415  | 84987     | Gain          |              | -                                                                                                                                             | -                |
| Case          | 71       | 5q21.1            | 5   | 99631884  | 99821543  | 189660    | Loss          | Yes          | -                                                                                                                                             | -                |
| Case          | 18       | 5q21.1            | 5   | 99772883  | 99871322  | 98440     | Loss          |              | -                                                                                                                                             | -                |
| Case          | 367      | 5q21.1            | 5   | 100461469 | 100518240 | 56772     | Loss          |              | -                                                                                                                                             | -                |
| Case          | 197      | 5q21.1            | 5   | 100461469 | 100514941 | 53473     | Loss          |              | -                                                                                                                                             | -                |
| Case          | 18       | 5q21.1            | 5   | 101307665 | 101373741 | 66077     | Gain          | Yes          | -                                                                                                                                             | -                |
| Case          | 286      | 5q21.1            | 5   | 101503526 | 101559228 | 55703     | Loss          |              | -                                                                                                                                             | -                |
| Case          | 303      | 5q21.1            | 5   | 101503526 | 101569442 | 65917     | Loss          |              | -                                                                                                                                             | -                |
| Case          | 324      | 5q21.1            | 5   | 101503526 | 101550136 | 46611     | Loss          |              | -                                                                                                                                             | -                |
| Case          | 353      | 5q21.2            | 5   | 103554051 | 103602049 | 47999     | Gain          | Yes          | -                                                                                                                                             | -                |
| Case          | 285      | 5q21.2            | 5   | 104299502 | 104338294 | 38793     | Loss          |              | -                                                                                                                                             | -                |
| Case          | 31       | 5q21.2            | 5   | 104301130 | 104326608 | 25479     | Loss          |              | -                                                                                                                                             | -                |
| Case          | 271      | 5q21.3,5q21.2     | 5   | 104494771 | 104511686 | 16916     | Loss          | Yes          | -                                                                                                                                             | -                |
| Case          | 257      | 5q21.3            | 5   | 106883108 | 106893242 | 10135     | Loss          | Yes          | -                                                                                                                                             | -                |
| Case          | 122      | 5q21.3            | 5   | 108894924 | 109175855 | 280932    | Gain          | Yes          | <i>MAN2A1</i>                                                                                                                                 | -                |
| Case          | 297      | 5q22.1            | 5   | 111470610 | 111486846 | 16237     | Gain          | Yes          | -                                                                                                                                             | -                |
| Case          | 123      | 5q22.3            | 5   | 113626945 | 113687846 | 60902     | Loss          | Yes          | -                                                                                                                                             | -                |

| Sample Status | SampleID | Cytoband | Chr | Start     | End       | Size (bp) | Gain/<br>Loss | Very<br>Rare | Protein-coding Genes in CNV | miRNAs in<br>CNV |
|---------------|----------|----------|-----|-----------|-----------|-----------|---------------|--------------|-----------------------------|------------------|
| Case          | 190      | 5q22.3   | 5   | 113956183 | 114003928 | 47746     | Loss          | -            |                             | -                |
| Case          | 105      | 5q23.1   | 5   | 115624176 | 115654919 | 30744     | Loss          | Yes          | -                           | -                |
| Case          | 131      | 5q23.1   | 5   | 117226687 | 117275670 | 48984     | Loss          | Yes          | -                           | -                |
| Case          | 255      | 5q23.1   | 5   | 117889295 | 117946086 | 56792     | Loss          | Yes          | -                           | -                |
| Case          | 45       | 5q23.1   | 5   | 117994411 | 118022253 | 27843     | Loss          | Yes          | -                           | -                |
| Case          | 8        | 5q23.1   | 5   | 119038846 | 119067837 | 28992     | Loss          | Yes          | -                           | -                |
| Case          | 363      | 5q23.1   | 5   | 120083229 | 120099754 | 16526     | Gain          | -            | -                           | -                |
| Case          | 180      | 5q23.1   | 5   | 120083229 | 120099754 | 16526     | Gain          | -            | -                           | -                |
| Case          | 203      | 5q23.1   | 5   | 120083229 | 120099754 | 16526     | Gain          | -            | -                           | -                |
| Case          | 191      | 5q23.1   | 5   | 121053695 | 121063821 | 10127     | Loss          | -            | -                           | -                |
| Case          | 273      | 5q23.2   | 5   | 124419299 | 124431136 | 11838     | Loss          | Yes          | -                           | -                |
| Case          | 255      | 5q23.2   | 5   | 126918371 | 126944061 | 25691     | Gain          | Yes          | -                           | -                |
| Case          | 260      | 5q23.3   | 5   | 129285653 | 129299431 | 13779     | Loss          | Yes          | -                           | -                |
| Case          | 36       | 5q33.1   | 5   | 150157290 | 150198797 | 41508     | Loss          | Yes          | -                           | -                |
| Case          | 129      | 5q33.1   | 5   | 151563301 | 151579307 | 16007     | Loss          | Yes          | -                           | -                |
| Case          | 308      | 5q33.1   | 5   | 151565320 | 151579307 | 13988     | Loss          | Yes          | -                           | -                |
| Case          | 288      | 5q33.1   | 5   | 151643567 | 151680663 | 37097     | Loss          | Yes          | -                           | -                |
| Case          | 323      | 5q33.1   | 5   | 151953804 | 151991698 | 37895     | Loss          | Yes          | -                           | -                |
| Case          | 57       | 5q33.2   | 5   | 152324136 | 152342899 | 18764     | Loss          | Yes          | -                           | -                |
| Case          | 325      | 5q33.2   | 5   | 155094943 | 155498190 | 403248    | Gain          | Yes          | -                           | -                |
| Case          | 33       | 5q33.3   | 5   | 157856228 | 157886797 | 30570     | Loss          | Yes          | -                           | -                |
| Case          | 108      | 5q34     | 5   | 162568797 | 162607658 | 38862     | Gain          | Yes          | -                           | -                |
| Case          | 254      | 5q34     | 5   | 165771452 | 165782533 | 11082     | Loss          | Yes          | -                           | -                |
| Case          | 132      | 5q34     | 5   | 165772240 | 165782533 | 10294     | Loss          | Yes          | -                           | -                |
| Case          | 330      | 5q35.3   | 5   | 180043394 | 180148872 | 105479    | Gain          | -            | <i>OR2Y1</i>                | -                |
| Case          | 245      | 5q35.3   | 5   | 180048423 | 180148872 | 100450    | Gain          | -            | <i>OR2Y1</i>                | -                |
| Case          | 250      | 5q35.3   | 5   | 180048423 | 180148872 | 100450    | Gain          | -            | <i>OR2Y1</i>                | -                |
| Case          | 85       | 5q35.3   | 5   | 180444921 | 180496467 | 51547     | Loss          | Yes          | -                           | -                |
| Case          | 153      | 6p25.3   | 6   | 356110    | 367736    | 11627     | Gain          | -            | -                           | -                |
| Case          | 19       | 6p25.3   | 6   | 436568    | 649424    | 212857    | Gain          | -            | <i>EXOC2; HUS1B</i>         | -                |
| Case          | 196      | 6p25.3   | 6   | 827436    | 906967    | 79532     | Gain          | Yes          | -                           | -                |
| Case          | 84       | 6p25.3   | 6   | 2051308   | 2195882   | 144575    | Loss          | Yes          | <i>GMDS</i>                 | -                |
| Case          | 332      | 6p22.3   | 6   | 19881532  | 19898958  | 17427     | Loss          | Yes          | -                           | -                |



| Sample Status | SampleID | Cytoband      | Chr | Start    | End      | Size (bp) | Gain/<br>Loss | Very<br>Rare | Protein-coding Genes in CNV                                                    | miRNAs in<br>CNV |
|---------------|----------|---------------|-----|----------|----------|-----------|---------------|--------------|--------------------------------------------------------------------------------|------------------|
| Case          | 161      | 6p22.2        | 6   | 23873630 | 23884488 | 10859     | Loss          | -            | -                                                                              | -                |
| Case          | 182      | 6p22.1        | 6   | 26481657 | 26513969 | 32313     | Gain          | Yes          | <i>BTN3A2; BTN2A2; BTN3A1</i>                                                  | -                |
| Case          | 274      | 6p22.1        | 6   | 29031959 | 29450804 | 418846    | Gain          |              | <i>ZNF311; OR2W1; LOC100129636; OR2B3; OR2J3; OR2J2; OR14J1; OR5V1; OR12D3</i> | -                |
| Case          | 63       | 6p22.1        | 6   | 29076909 | 29263728 | 186820    | Loss          |              | <i>ZNF311; OR2W1; LOC100129636; OR2B3; OR2J3; OR2J2</i>                        | -                |
| Case          | 72       | 6p21.33       | 6   | 31459866 | 31510976 | 51111     | Loss          | Yes          | <i>MICA</i>                                                                    | -                |
| Case          | 72       | 6p21.32       | 6   | 32871866 | 32918421 | 46556     | Loss          | Yes          | <i>HLA-DOB; TAP2; PSMB8</i>                                                    | -                |
| Case          | 267      | 6p21.32       | 6   | 33072945 | 33230309 | 157365    | Loss          | Yes          | <i>HLA-DOA; HLA-DPA1; HLA-DPBI</i>                                             | -                |
| Case          | 63       | 6p21.32       | 6   | 33583731 | 33598395 | 14665     | Loss          | Yes          | -                                                                              | -                |
| Case          | 335      | 6p21.32       | 6   | 33584696 | 33598395 | 13700     | Loss          | Yes          | -                                                                              | -                |
| Case          | 95       | 6p21.31       | 6   | 34175770 | 34218808 | 43039     | Gain          | Yes          | <i>GRM4</i>                                                                    | -                |
| Case          | 72       | 6p21.31       | 6   | 35860770 | 35909323 | 48554     | Loss          | Yes          | <i>CLPSL1; CLPS; LHFPL5</i>                                                    | -                |
| Case          | 242      | 6p21.1        | 6   | 45071609 | 45174789 | 103181    | Loss          | Yes          | <i>SUPT3H</i>                                                                  | -                |
| Case          | 119      | 6p21.1        | 6   | 45099365 | 45146028 | 46664     | Loss          |              | -                                                                              | -                |
| Case          | 375      | 6p12.3,6p21.1 | 6   | 45104704 | 45224239 | 119536    | Loss          | Yes          | <i>SUPT3H</i>                                                                  | -                |
| Case          | 328      | 6p21.1        | 6   | 45104704 | 45147409 | 42706     | Loss          |              | -                                                                              | -                |
| Case          | 231      | 6p12.3,6p21.1 | 6   | 45129193 | 45427854 | 298662    | Loss          | Yes          | <i>SUPT3H; RUNX2</i>                                                           | hsa-miR-586      |
| Case          | 323      | 6p12.1        | 6   | 54685768 | 54696028 | 10261     | Loss          | Yes          | -                                                                              | -                |
| Case          | 94       | 6p12.1        | 6   | 56267767 | 56594166 | 326400    | Loss          | Yes          | <i>DST</i>                                                                     | -                |
| Case          | 22       | 6q11.1        | 6   | 61944399 | 62975943 | 1031545   | Gain          | Yes          | <i>KHDRBS2</i>                                                                 | -                |
| Case          | 23       | 6q11.1        | 6   | 61944399 | 62447384 | 502986    | Gain          |              | -                                                                              | -                |
| Case          | 76       | 6q11.1        | 6   | 62867842 | 62933146 | 65305     | Loss          | Yes          | -                                                                              | -                |
| Case          | 97       | 6q11.1        | 6   | 62929151 | 63392084 | 462934    | Gain          | Yes          | <i>KHDRBS2</i>                                                                 | -                |
| Case          | 338      | 6q11.2, 6q12  | 6   | 63462641 | 63548563 | 85923     | Gain          | Yes          | -                                                                              | -                |
| Case          | 294      | 6q12          | 6   | 65613806 | 65925839 | 312034    | Loss          |              | <i>EYS</i>                                                                     | -                |
| Case          | 135      | 6q12          | 6   | 65842260 | 65871859 | 29600     | Loss          |              | -                                                                              | -                |
| Case          | 78       | 6q13          | 6   | 70265826 | 70280028 | 14203     | Loss          | Yes          | -                                                                              | -                |
| Case          | 142      | 6q13          | 6   | 70308225 | 70323543 | 15319     | Loss          |              | -                                                                              | -                |
| Case          | 101      | 6q13          | 6   | 75564098 | 75591301 | 27204     | Loss          | Yes          | -                                                                              | -                |
| Case          | 342      | 6q14.1        | 6   | 82841833 | 82856591 | 14759     | Loss          | Yes          | -                                                                              | -                |
| Case          | 343      | 6q14.1        | 6   | 83583008 | 83611270 | 28263     | Gain          |              | -                                                                              | -                |
| Case          | 24       | 6q14.3        | 6   | 86804893 | 87382048 | 577156    | Gain          | Yes          | -                                                                              | -                |

| Sample Status | SampleID | Cytoband          | Chr | Start     | End       | Size (bp) | Gain/<br>Loss | Very<br>Rare | Protein-coding Genes in CNV                                             | miRNAs in<br>CNV |
|---------------|----------|-------------------|-----|-----------|-----------|-----------|---------------|--------------|-------------------------------------------------------------------------|------------------|
| Case          | 24       | 6q15, 6q14.3      | 6   | 87411226  | 87696919  | 285694    | Gain          | Yes          | -                                                                       | -                |
| Case          | 182      | 6q15              | 6   | 89894102  | 89946180  | 52079     | Loss          | Yes          | <i>PM20D2; GABRR1</i>                                                   | -                |
| Case          | 280      | 6q16.1            | 6   | 95499210  | 95543872  | 44663     | Loss          | Yes          | -                                                                       | -                |
| Case          | 11       | 6q16.1            | 6   | 95602570  | 95616875  | 14306     | Gain          |              | -                                                                       | -                |
| Case          | 25       | 6q16.2,<br>6q16.3 | 6   | 98969135  | 100377167 | 1408033   | Gain          | Yes          | <i>USP45; TSTD3; CCNC; PRDM13; POU3F2;<br/>FBXL4; FAXC; COQ3; PNISR</i> | hsa-miR-548ai    |
| Case          | 221      | 6q16.3            | 6   | 100654517 | 100720272 | 65756     | Gain          |              | -                                                                       | -                |
| Case          | 62       | 6q16.3            | 6   | 103237557 | 103262485 | 24929     | Loss          | Yes          | -                                                                       | -                |
| Case          | 287      | 6q16.3            | 6   | 103749255 | 103844668 | 95414     | Gain          | Yes          | -                                                                       | -                |
| Case          | 147      | 6q21              | 6   | 107238501 | 107273248 | 34748     | Loss          | Yes          | -                                                                       | -                |
| Case          | 343      | 6q22.1, 6q21      | 6   | 113810260 | 113906649 | 96390     | Gain          | Yes          | -                                                                       | -                |
| Case          | 369      | 6q22.2            | 6   | 117837285 | 117848188 | 10904     | Gain          |              | <i>ROS1</i>                                                             | -                |
| Case          | 239      | 6q24.2            | 6   | 144516701 | 144537619 | 20919     | Loss          | Yes          | -                                                                       | -                |
| Case          | 177      | 6q26              | 6   | 160951755 | 160989032 | 37278     | Gain          |              | <i>LPA</i>                                                              | -                |
| Case          | 274      | 6q26              | 6   | 162328128 | 162365931 | 37804     | Loss          | Yes          | -                                                                       | -                |
| Case          | 369      | 6q26              | 6   | 162543883 | 162567234 | 23352     | Loss          |              | -                                                                       | -                |
| Case          | 251      | 6q27              | 6   | 165015262 | 165110805 | 95544     | Loss          | Yes          | -                                                                       | -                |
| Case          | 93       | 6q27              | 6   | 168078127 | 168196892 | 118766    | Gain          | Yes          | <i>MLLT4; HGC6.3; KIF25</i>                                             | -                |
| Case          | 93       | 6q27              | 6   | 168236886 | 168336359 | 99474     | Gain          | Yes          | -                                                                       | -                |
| Case          | 150      | 7p22.3            | 7   | 215461    | 276737    | 61277     | Loss          | Yes          | -                                                                       | -                |
| Case          | 127      | 7p22.3            | 7   | 274271    | 294586    | 20316     | Loss          |              | <i>FAM20C</i>                                                           | -                |
| Case          | 333      | 7p22.3            | 7   | 274271    | 294586    | 20316     | Loss          |              | <i>FAM20C</i>                                                           | -                |
| Case          | 157      | 7p22.2            | 7   | 3100628   | 3125861   | 25234     | Loss          | Yes          | -                                                                       | -                |
| Case          | 64       | 7p22.1, 7p22.2    | 7   | 4473499   | 4509826   | 36328     | Loss          | Yes          | -                                                                       | -                |
| Case          | 199      | 7p22.1            | 7   | 5102874   | 5142541   | 39668     | Loss          | Yes          | -                                                                       | -                |
| Case          | 27       | 7p21.3            | 7   | 9573572   | 10653767  | 1080196   | Gain          | Yes          | -                                                                       | -                |
| Case          | 26       | 7p21.3            | 7   | 9580685   | 10400068  | 819384    | Loss          |              | -                                                                       | -                |
| Case          | 126      | 7p21.3            | 7   | 11719807  | 11769283  | 49477     | Gain          | Yes          | -                                                                       | -                |
| Case          | 147      | 7p21.3            | 7   | 12267347  | 12355918  | 88572     | Gain          | Yes          | <i>VWDE</i>                                                             | -                |
| Case          | 297      | 7p21.3            | 7   | 13077594  | 13208875  | 131282    | Loss          |              | -                                                                       | -                |
| Case          | 240      | 7p21.1            | 7   | 15252901  | 15394987  | 142087    | Loss          |              | <i>AGMO</i>                                                             | -                |
| Case          | 347      | 7p21.1            | 7   | 15271281  | 15383317  | 112037    | Loss          |              | <i>AGMO</i>                                                             | -                |

| Sample Status | SampleID | Cytoband | Chr | Start     | End       | Size (bp) | Gain/<br>Loss | Very<br>Rare | Protein-coding Genes in CNV           | miRNAs in<br>CNV |
|---------------|----------|----------|-----|-----------|-----------|-----------|---------------|--------------|---------------------------------------|------------------|
| Case          | 182      | 7p21.1   | 7   | 15338457  | 15419944  | 81488     | Loss          | Yes          | <i>AGMO</i>                           | -                |
| Case          | 270      | 7p21.1   | 7   | 15369491  | 15391936  | 22446     | Loss          |              | <i>AGMO</i>                           | -                |
| Case          | 301      | 7p21.1   | 7   | 15714208  | 15730998  | 16791     | Loss          | Yes          | -                                     | -                |
| Case          | 92       | 7p21.1   | 7   | 17914329  | 17939036  | 24708     | Loss          | Yes          | -                                     | -                |
| Case          | 11       | 7p15.2   | 7   | 27316733  | 27360043  | 43311     | Gain          | Yes          | -                                     | -                |
| Case          | 109      | 7p15.1   | 7   | 31491777  | 31507262  | 15486     | Gain          | Yes          | -                                     | -                |
| Case          | 171      | 7p14.3   | 7   | 34133531  | 34150905  | 17375     | Loss          | Yes          | <i>BMPER</i>                          | -                |
| Case          | 120      | 7p14.1   | 7   | 38246749  | 38353316  | 106568    | Loss          | Yes          | <i>TARP</i>                           | -                |
| Case          | 165      | 7p14.1   | 7   | 38246749  | 38353316  | 106568    | Loss          | Yes          | <i>TARP</i>                           | -                |
| Case          | 163      | 7p14.1   | 7   | 38260626  | 38296343  | 35718     | Loss          |              | <i>TARP</i>                           | -                |
| Case          | 163      | 7p14.1   | 7   | 38315337  | 38325481  | 10145     | Loss          | Yes          | -                                     | -                |
| Case          | 108      | 7p14.1   | 7   | 40303634  | 40351100  | 47467     | Loss          | Yes          | <i>C7orf10</i>                        | -                |
| Case          | 199      | 7p12.3   | 7   | 46895854  | 46956322  | 60469     | Gain          | Yes          | -                                     | -                |
| Case          | 138      | 7p12.3   | 7   | 48552398  | 48573909  | 21512     | Loss          | Yes          | -                                     | -                |
| Case          | 110      | 7q11.21  | 7   | 61365842  | 61474014  | 108173    | Gain          | Yes          | -                                     | -                |
| Case          | 87       | 7q11.21  | 7   | 61714736  | 61761509  | 46774     | Loss          |              | -                                     | -                |
| Case          | 87       | 7q11.21  | 7   | 61818545  | 62303039  | 484495    | Loss          | Yes          | -                                     | -                |
| Case          | 56       | 7q11.21  | 7   | 63163680  | 63433451  | 269772    | Loss          |              | <i>ZNF727; ZNF735; ZNF679; ZNF736</i> | -                |
| Case          | 125      | 7q11.21  | 7   | 64703608  | 64785847  | 82240     | Loss          |              | -                                     | -                |
| Case          | 1        | 7q11.22  | 7   | 69827248  | 69843389  | 16142     | Loss          | Yes          | -                                     | -                |
| Case          | 126      | 7q11.22  | 7   | 70886612  | 70907066  | 20455     | Gain          |              | <i>CALN1</i>                          | -                |
| Case          | 223      | 7q11.22  | 7   | 71331369  | 71463097  | 131729    | Loss          | Yes          | <i>CALN1</i>                          | -                |
| Case          | 143      | 7q21.11  | 7   | 80467338  | 80517630  | 50293     | Loss          |              | -                                     | -                |
| Case          | 305      | 7q21.11  | 7   | 80482086  | 80517630  | 35545     | Loss          |              | -                                     | -                |
| Case          | 166      | 7q21.11  | 7   | 81829583  | 82016914  | 187332    | Gain          | Yes          | <i>CACNA2D1</i>                       | -                |
| Case          | 249      | 7q21.11  | 7   | 81829583  | 82154832  | 325250    | Gain          |              | <i>CACNA2D1</i>                       | -                |
| Case          | 195      | 7q21.11  | 7   | 83380795  | 83468436  | 87642     | Gain          | Yes          | <i>SEMA3A</i>                         | -                |
| Case          | 251      | 7q21.11  | 7   | 85286106  | 85325193  | 39088     | Gain          | Yes          | -                                     | -                |
| Case          | 251      | 7q21.11  | 7   | 85454163  | 85571387  | 117225    | Loss          | Yes          | -                                     | -                |
| Case          | 349      | 7q21.13  | 7   | 88203436  | 88321523  | 118088    | Gain          |              | <i>ZNF804B; C7orf62</i>               | -                |
| Case          | 348      | 7q21.3   | 7   | 93484277  | 93554199  | 69923     | Gain          | Yes          | -                                     | -                |
| Case          | 229      | 7q22.1   | 7   | 102630698 | 102656246 | 25549     | Loss          |              | -                                     | -                |
| Case          | 131      | 7q22.1   | 7   | 103178239 | 103268966 | 90728     | Loss          | Yes          | <i>RELN</i>                           | -                |

| Sample Status | SampleID | Cytoband | Chr | Start     | End       | Size (bp) | Gain/<br>Loss | Very<br>Rare | Protein-coding Genes in CNV | miRNAs in<br>CNV             |
|---------------|----------|----------|-----|-----------|-----------|-----------|---------------|--------------|-----------------------------|------------------------------|
| Case          | 155      | 7q31.1   | 7   | 108376431 | 108466448 | 90018     | Loss          | Yes          | -                           | -                            |
| Case          | 358      | 7q31.1   | 7   | 110824661 | 110870077 | 45417     | Loss          |              | -                           | -                            |
| Case          | 199      | 7q31.1   | 7   | 110879700 | 110924988 | 45289     | Loss          | Yes          | <i>IMMP2L</i>               | -                            |
| Case          | 217      | 7q31.31  | 7   | 117922977 | 117952715 | 29739     | Loss          |              | -                           | -                            |
| Case          | 28       | 7q31.31  | 7   | 118515093 | 119719187 | 1204095   | Gain          |              | <i>KCND2</i>                | -                            |
| Case          | 300      | 7q31.31  | 7   | 118639612 | 118813258 | 173647    | Loss          |              | -                           | -                            |
| Case          | 14       | 7q31.31  | 7   | 118639612 | 118813258 | 173647    | Loss          |              | -                           | -                            |
| Case          | 344      | 7q31.33  | 7   | 126239994 | 126323049 | 83056     | Loss          |              | -                           | -                            |
| Case          | 135      | 7q33     | 7   | 135552085 | 135636640 | 84556     | Gain          | Yes          | -                           | -                            |
| Case          | 81       | 7q33     | 7   | 136134010 | 136153874 | 19865     | Loss          | Yes          | -                           | -                            |
| Case          | 259      | 7q34     | 7   | 138022379 | 138044041 | 21663     | Loss          | Yes          | <i>ATP6V0A4</i>             | -                            |
| Case          | 191      | 7q34     | 7   | 141374565 | 141395819 | 21255     | Loss          | Yes          | <i>MGAM</i>                 | -                            |
| Case          | 169      | 7q35     | 7   | 142989313 | 143028975 | 39663     | Gain          | Yes          | -                           | -                            |
| Case          | 250      | 7q35     | 7   | 143141990 | 143163931 | 21942     | Gain          |              | -                           | -                            |
| Case          | 192      | 7q35     | 7   | 143780166 | 143807844 | 27679     | Loss          | Yes          | <i>TPK1</i>                 | -                            |
| Case          | 360      | 7q35     | 7   | 144635225 | 144649727 | 14503     | Loss          |              | -                           | -                            |
| Case          | 222      | 7q35     | 7   | 144635225 | 144649727 | 14503     | Loss          |              | -                           | -                            |
| Case          | 212      | 7q35     | 7   | 145374940 | 145504520 | 129581    | Loss          |              | <i>CNTNAP2</i>              | -                            |
| Case          | 30       | 7q35     | 7   | 145620226 | 145725609 | 105384    | Loss          |              | -                           | -                            |
| Case          | 139      | 7q35     | 7   | 145853110 | 145885593 | 32484     | Gain          |              | -                           | -                            |
| Case          | 243      | 7q35     | 7   | 145857231 | 145889771 | 32541     | Gain          |              | -                           | -                            |
| Case          | 6        | 7q35     | 7   | 145857231 | 145885593 | 28363     | Gain          |              | -                           | -                            |
| Case          | 125      | 7q36.1   | 7   | 148547560 | 148568069 | 20510     | Gain          | Yes          | <i>ZNF282; ZNF212</i>       | -                            |
| Case          | 93       | 7q36.1   | 7   | 149425988 | 149440955 | 14968     | Loss          | Yes          | -                           | -                            |
| Case          | 303      | 7q36.1   | 7   | 149425988 | 149440955 | 14968     | Loss          | Yes          | -                           | -                            |
| Case          | 315      | 7q36.2   | 7   | 153844249 | 154051446 | 207198    | Loss          |              | <i>DPP6</i>                 | -                            |
| Case          | 273      | 8p23.3   | 8   | 177446    | 243531    | 66086     | Gain          | Yes          | <i>ZNF596</i>               | -                            |
| Case          | 29       | 8p23.3   | 8   | 439294    | 1172602   | 733309    | Gain          | Yes          | <i>TDRP; ERICH1</i>         | -                            |
| Case          | 350      | 8p23.3   | 8   | 1357659   | 1375303   | 17645     | Loss          | Yes          | -                           | -                            |
| Case          | 258      | 8p23.3   | 8   | 1667092   | 1758170   | 91079     | Gain          | Yes          | <i>CLN8</i>                 | hsa-miR-3674;<br>hsa-miR-596 |
| Case          | 88       | 8p23.3   | 8   | 2089352   | 2120782   | 31431     | Loss          | Yes          | -                           | -                            |
| Case          | 237      | 8p23.2   | 8   | 2582631   | 2655988   | 73358     | Loss          | Yes          | -                           | -                            |

| Sample Status | SampleID | Cytoband | Chr | Start    | End      | Size (bp) | Gain/<br>Loss | Very<br>Rare | Protein-coding Genes in CNV                                   | miRNAs in<br>CNV |
|---------------|----------|----------|-----|----------|----------|-----------|---------------|--------------|---------------------------------------------------------------|------------------|
| Case          | 139      | 8p23.2   | 8   | 3102233  | 3116419  | 14187     | Loss          | -            |                                                               | -                |
| Case          | 178      | 8p23.2   | 8   | 3102233  | 3115581  | 13349     | Loss          | -            |                                                               | -                |
| Case          | 210      | 8p23.2   | 8   | 3156758  | 3221879  | 65122     | Loss          | Yes          | <i>CSMD1</i>                                                  | -                |
| Case          | 82       | 8p23.2   | 8   | 3345017  | 3358080  | 13064     | Loss          | Yes          | -                                                             | -                |
| Case          | 152      | 8p23.2   | 8   | 3347622  | 3364437  | 16816     | Loss          | Yes          | -                                                             | -                |
| Case          | 260      | 8p23.2   | 8   | 3881288  | 3973702  | 92415     | Loss          | Yes          | -                                                             | -                |
| Case          | 54       | 8p23.2   | 8   | 3901833  | 4019228  | 117396    | Loss          | Yes          | -                                                             | -                |
| Case          | 85       | 8p23.2   | 8   | 5659866  | 5685911  | 26046     | Loss          | -            | -                                                             | -                |
| Case          | 299      | 8p23.1   | 8   | 6217216  | 6243941  | 26726     | Loss          | Yes          | -                                                             | -                |
| Case          | 46       | 8p23.1   | 8   | 7174042  | 7285606  | 111565    | Gain          | Yes          | <i>USP17L1P; USP17L4; ZNF705G; DEFB4B; DEFB103A; DEFB103B</i> | -                |
| Case          | 63       | 8p23.1   | 8   | 7836262  | 7847316  | 11055     | Gain          | -            | <i>ZNF705B</i>                                                | -                |
| Case          | 222      | 8p23.1   | 8   | 8300892  | 8339794  | 38903     | Loss          | -            | -                                                             | -                |
| Case          | 25       | 8p23.1   | 8   | 9410926  | 9423620  | 12695     | Loss          | Yes          | -                                                             | -                |
| Case          | 361      | 8p23.1   | 8   | 10629211 | 10841027 | 211817    | Gain          | -            | <i>PINX1; XKR6</i>                                            | hsa-miR-1322     |
| Case          | 102      | 8p23.1   | 8   | 11430289 | 11465046 | 34758     | Gain          | -            | <i>BLK</i>                                                    | -                |
| Case          | 317      | 8p23.1   | 8   | 12402552 | 12487426 | 84875     | Loss          | Yes          | -                                                             | -                |
| Case          | 156      | 8p23.1   | 8   | 12483119 | 12526418 | 43300     | Loss          | -            | -                                                             | -                |
| Case          | 238      | 8p22     | 8   | 12862253 | 12888812 | 26560     | Gain          | -            | -                                                             | -                |
| Case          | 310      | 8p22     | 8   | 12864210 | 12884785 | 20576     | Gain          | -            | -                                                             | -                |
| Case          | 328      | 8p22     | 8   | 13825280 | 13840561 | 15282     | Loss          | Yes          | -                                                             | -                |
| Case          | 90       | 8p22     | 8   | 14847313 | 14866894 | 19582     | Loss          | -            | -                                                             | -                |
| Case          | 352      | 8p21.3   | 8   | 19805543 | 19824144 | 18602     | Loss          | Yes          | -                                                             | -                |
| Case          | 121      | 8p21.3   | 8   | 20208197 | 20476996 | 268800    | Gain          | Yes          | -                                                             | -                |
| Case          | 75       | 8p21.3   | 8   | 22265902 | 22432679 | 166778    | Gain          | Yes          | <i>PIWIL2; SLC39A14; PPP3CC</i>                               | -                |
| Case          | 76       | 8p21.3   | 8   | 22265902 | 22432679 | 166778    | Gain          | Yes          | <i>PIWIL2; SLC39A14; PPP3CC</i>                               | -                |
| Case          | 235      | 8p21.2   | 8   | 24311240 | 24338666 | 27427     | Loss          | Yes          | <i>ADAMDECI</i>                                               | -                |
| Case          | 165      | 8p21.1   | 8   | 28671412 | 28729336 | 57925     | Gain          | Yes          | <i>INTS9</i>                                                  | -                |
| Case          | 266      | 8p21.1   | 8   | 28673431 | 28744299 | 70869     | Gain          | Yes          | <i>INTS9</i>                                                  | -                |
| Case          | 96       | 8p12     | 8   | 31839032 | 31914256 | 75225     | Gain          | Yes          | -                                                             | -                |
| Case          | 17       | 8p12     | 8   | 33295295 | 33313563 | 18269     | Loss          | -            | -                                                             | -                |
| Case          | 181      | 8p12     | 8   | 34540599 | 34563968 | 23370     | Loss          | Yes          | -                                                             | -                |

| Sample Status | SampleID | Cytoband           | Chr | Start     | End       | Size (bp) | Gain/<br>Loss | Very<br>Rare | Protein-coding Genes in CNV    | miRNAs in<br>CNV |
|---------------|----------|--------------------|-----|-----------|-----------|-----------|---------------|--------------|--------------------------------|------------------|
| Case          | 30       | 8p11.21,<br>8p11.1 | 8   | 43132979  | 43905959  | 772981    | Gain          |              | <i>HGSNAT; POTEA</i>           | -                |
| Case          | 373      | 8q11.21            | 8   | 48335451  | 48391592  | 56142     | Gain          |              | <i>KIAA0146</i>                | -                |
| Case          | 210      | 8q11.23            | 8   | 54038036  | 54083875  | 45840     | Gain          | Yes          | -                              | -                |
| Case          | 254      | 8q12.1             | 8   | 58241101  | 58280040  | 38940     | Loss          | Yes          | -                              | -                |
| Case          | 31       | 8q12.1             | 8   | 60901679  | 61668467  | 766789    | Gain          | Yes          | <i>CA8; RAB2A</i>              | -                |
| Case          | 66       | 8q12.3             | 8   | 63490044  | 63515695  | 25652     | Loss          | Yes          | -                              | -                |
| Case          | 18       | 8q13.3             | 8   | 71777229  | 71793543  | 16315     | Loss          |              | <i>XKR9</i>                    | -                |
| Case          | 337      | 8q13.3             | 8   | 71777229  | 71794424  | 17196     | Loss          |              | <i>XKR9</i>                    | -                |
| Case          | 64       | 8q13.3             | 8   | 72587883  | 72627420  | 39538     | Gain          | Yes          | -                              | -                |
| Case          | 227      | 8q21.11            | 8   | 74777113  | 74806246  | 29134     | Loss          | Yes          | <i>STAU2</i>                   | -                |
| Case          | 300      | 8q21.12            | 8   | 78775076  | 78853955  | 78880     | Loss          | Yes          | -                              | -                |
| Case          | 305      | 8q21.12            | 8   | 78926709  | 78965879  | 39171     | Loss          | Yes          | -                              | -                |
| Case          | 288      | 8q21.12            | 8   | 79309837  | 79369973  | 60137     | Gain          | Yes          | -                              | -                |
| Case          | 24       | 8q21.13            | 8   | 83904905  | 83934811  | 29907     | Loss          |              | -                              | -                |
| Case          | 217      | 8q21.13            | 8   | 83904905  | 83934811  | 29907     | Loss          |              | -                              | -                |
| Case          | 290      | 8q21.2             | 8   | 86726773  | 86744665  | 17893     | Gain          | Yes          | -                              | -                |
| Case          | 32       | 8q21.3             | 8   | 89566045  | 90639425  | 1073381   | Gain          | Yes          | -                              | -                |
| Case          | 48       | 8q21.3             | 8   | 89879454  | 89918309  | 38856     | Loss          | Yes          | -                              | -                |
| Case          | 111      | 8q21.3             | 8   | 90595439  | 90616240  | 20802     | Gain          | Yes          | -                              | -                |
| Case          | 27       | 8q21.3             | 8   | 90595439  | 90616240  | 20802     | Gain          | Yes          | -                              | -                |
| Case          | 32       | 8q21.3             | 8   | 90684909  | 90786498  | 101590    | Gain          | Yes          | -                              | -                |
| Case          | 70       | 8q21.3             | 8   | 90906777  | 90935078  | 28302     | Loss          | Yes          | -                              | -                |
| Case          | 288      | 8q21.3             | 8   | 92180506  | 92256189  | 75684     | Loss          |              | <i>LRRC69</i>                  | -                |
| Case          | 133      | 8q23.3             | 8   | 115386857 | 115445017 | 58161     | Loss          |              | -                              | -                |
| Case          | 195      | 8q23.3             | 8   | 115386857 | 115445017 | 58161     | Loss          |              | -                              | -                |
| Case          | 331      | 8q23.3             | 8   | 115386857 | 115445017 | 58161     | Loss          |              | -                              | -                |
| Case          | 251      | 8q23.3             | 8   | 116253636 | 116325442 | 71807     | Loss          | Yes          | -                              | -                |
| Case          | 110      | 8q24.13            | 8   | 124808752 | 125129092 | 320341    | Gain          | Yes          | <i>ANXA13; FAM91A1; FER1L6</i> | -                |
| Case          | 53       | 8q24.13            | 8   | 126247193 | 126271736 | 24544     | Loss          | Yes          | <i>NSMCE2</i>                  | -                |
| Case          | 183      | 8q24.21            | 8   | 130655502 | 130969212 | 313711    | Gain          | Yes          | <i>GSDMC; FAM49B</i>           | -                |
| Case          | 104      | 8q24.23            | 8   | 137487708 | 137705417 | 217710    | Loss          | Yes          | -                              | -                |
| Case          | 137      | 8q24.23            | 8   | 138322016 | 138430764 | 108749    | Loss          | Yes          | -                              | -                |

| Sample Status | SampleID | Cytoband          | Chr | Start     | End       | Size (bp) | Gain/<br>Loss | Very<br>Rare | Protein-coding Genes in CNV                                   | miRNAs in<br>CNV   |
|---------------|----------|-------------------|-----|-----------|-----------|-----------|---------------|--------------|---------------------------------------------------------------|--------------------|
| Case          | 305      | 8q24.23           | 8   | 138328381 | 138430764 | 102384    | Loss          | Yes          | -                                                             | -                  |
| Case          | 315      | 8q24.23           | 8   | 138328381 | 138430764 | 102384    | Loss          | Yes          | -                                                             | -                  |
| Case          | 163      | 8q24.23           | 8   | 139134676 | 139171118 | 36443     | Loss          | Yes          | -                                                             | -                  |
| Case          | 162      | 8q24.23           | 8   | 139827235 | 139837267 | 10033     | Loss          | Yes          | <i>COL22A1</i>                                                | -                  |
| Case          | 235      | 8q24.3            | 8   | 142344394 | 142473801 | 129408    | Gain          | Yes          | <i>GPR20</i>                                                  | -                  |
| Case          | 336      | 8q24.3            | 8   | 146139682 | 146218176 | 78495     | Gain          |              | <i>ZNF16</i>                                                  | -                  |
| Case          | 51       | 8q24.3            | 8   | 146174150 | 146268959 | 94810     | Gain          |              | <i>C8orf33</i>                                                | -                  |
| Case          | 275      | 9p24.3            | 9   | 83270     | 139480    | 56211     | Gain          |              | <i>FOXD4; CBWD1</i>                                           | -                  |
| Case          | 336      | 9p24.3            | 9   | 508099    | 629147    | 121049    | Loss          |              | -                                                             | -                  |
| Case          | 166      | 9p24.3            | 9   | 1636820   | 1746470   | 109651    | Loss          | Yes          | -                                                             | -                  |
| Case          | 168      | 9p24.3            | 9   | 1712942   | 1748705   | 35764     | Gain          | Yes          | -                                                             | -                  |
| Case          | 319      | 9p24.2            | 9   | 2223969   | 2354269   | 130301    | Loss          | Yes          | -                                                             | -                  |
| Case          | 181      | 9p24.2            | 9   | 2253373   | 2678522   | 425150    | Gain          |              | <i>VLDLR</i>                                                  | -                  |
| Case          | 99       | 9p24.2            | 9   | 4250863   | 4263941   | 13079     | Loss          |              | -                                                             | -                  |
| Case          | 371      | 9p24.2            | 9   | 4250863   | 4263941   | 13079     | Loss          |              | -                                                             | -                  |
| Case          | 393      | 9p24.2            | 9   | 4250863   | 4263941   | 13079     | Loss          |              | -                                                             | -                  |
| Case          | 322      | 9p24.2            | 9   | 4371509   | 4438454   | 66946     | Loss          | Yes          | -                                                             | -                  |
| Case          | 7        | 9p24.1,<br>9p24.2 | 9   | 4527834   | 5014492   | 486659    | Loss          | Yes          | <i>SLC1A1; SPATA6L; PPAPDC2; CDC37L1;<br/>AK3; RCL1; JAK2</i> | hsa-miR-101-<br>3p |
| Case          | 77       | 9p24.1            | 9   | 5014345   | 5096705   | 82361     | Gain          | Yes          | <i>JAK2</i>                                                   | -                  |
| Case          | 170      | 9p24.1            | 9   | 5375779   | 5388011   | 12233     | Loss          |              | -                                                             | -                  |
| Case          | 186      | 9p24.1            | 9   | 5375779   | 5388011   | 12233     | Loss          |              | -                                                             | -                  |
| Case          | 188      | 9p24.1            | 9   | 5375779   | 5388011   | 12233     | Loss          |              | -                                                             | -                  |
| Case          | 40       | 9p24.1            | 9   | 5375779   | 5388011   | 12233     | Loss          |              | -                                                             | -                  |
| Case          | 335      | 9p24.1            | 9   | 5375779   | 5388011   | 12233     | Loss          |              | -                                                             | -                  |
| Case          | 225      | 9p24.1            | 9   | 6206925   | 6236144   | 29220     | Loss          | Yes          | <i>IL33</i>                                                   | -                  |
| Case          | 264      | 9p24.1            | 9   | 6735563   | 6854377   | 118815    | Gain          |              | <i>KDM4C</i>                                                  | -                  |
| Case          | 77       | 9p24.1            | 9   | 7929394   | 7952518   | 23125     | Gain          | Yes          | -                                                             | -                  |
| Case          | 10       | 9p24.1            | 9   | 8010572   | 8092978   | 82407     | Loss          | Yes          | -                                                             | -                  |
| Case          | 230      | 9p23              | 9   | 9758713   | 9785428   | 26716     | Gain          | Yes          | -                                                             | -                  |
| Case          | 89       | 9p23              | 9   | 9819046   | 9979684   | 160639    | Loss          |              | -                                                             | -                  |
| Case          | 362      | 9p23              | 9   | 9931673   | 9953879   | 22207     | Loss          |              | -                                                             | -                  |
| Case          | 62       | 9p23              | 9   | 11247448  | 11271192  | 23745     | Loss          | Yes          | -                                                             | -                  |

| Sample Status | SampleID | Cytoband          | Chr | Start    | End      | Size (bp) | Gain/<br>Loss | Very<br>Rare | Protein-coding Genes in CNV         | miRNAs in<br>CNV                                               |
|---------------|----------|-------------------|-----|----------|----------|-----------|---------------|--------------|-------------------------------------|----------------------------------------------------------------|
| Case          | 263      | 9p23              | 9   | 11722406 | 11843647 | 121242    | Loss          | -            |                                     | -                                                              |
| Case          | 282      | 9p23              | 9   | 11753878 | 11843647 | 89770     | Loss          | -            |                                     | -                                                              |
| Case          | 154      | 9p23              | 9   | 11994261 | 12025563 | 31303     | Loss          | Yes          | -                                   | -                                                              |
| Case          | 110      | 9p23              | 9   | 13733088 | 13822100 | 89013     | Loss          | Yes          | -                                   | -                                                              |
| Case          | 313      | 9p22.2            | 9   | 16938400 | 16953863 | 15464     | Loss          | Yes          | -                                   | -                                                              |
| Case          | 144      | 9p22.2            | 9   | 17614700 | 17662390 | 47691     | Loss          | Yes          | -                                   | -                                                              |
| Case          | 249      | 9p21.3            | 9   | 19931032 | 20019294 | 88263     | Gain          | Yes          | -                                   | -                                                              |
| Case          | 331      | 9p21.3            | 9   | 20007578 | 20051906 | 44329     | Loss          | Yes          | -                                   | -                                                              |
| Case          | 129      | 9p21.3            | 9   | 23068341 | 23084676 | 16336     | Loss          | -            | -                                   | -                                                              |
| Case          | 85       | 9p21.3            | 9   | 23160527 | 23190174 | 29648     | Gain          | Yes          | -                                   | -                                                              |
| Case          | 157      | 9p21.1            | 9   | 28559575 | 28575282 | 15708     | Loss          | Yes          | -                                   | -                                                              |
| Case          | 256      | 9p21.1            | 9   | 28764737 | 29075968 | 311232    | Loss          | Yes          | -                                   | hsa-miR-876-5p; hsa-miR-876-3p; hsa-miR-873-5p; hsa-miR-873-3p |
| Case          | 156      | 9p21.1            | 9   | 28963345 | 28979497 | 16153     | Loss          | Yes          | -                                   | -                                                              |
| Case          | 144      | 9p21.1            | 9   | 30050380 | 30088140 | 37761     | Loss          | Yes          | -                                   | -                                                              |
| Case          | 33       | 9p21.1            | 9   | 30791693 | 31341315 | 549623    | Loss          | Yes          | -                                   | -                                                              |
| Case          | 12       | 9p21.1            | 9   | 32237350 | 32329478 | 92129     | Loss          | Yes          | -                                   | -                                                              |
| Case          | 34       | 9p13.3,<br>9p13.2 | 9   | 36173229 | 37035664 | 862436    | Loss          | Yes          | <i>CLTA; GNE; RNF38; MELK; PAX5</i> | hsa-miR-4475; hsa-miR-4540; hsa-miR-4476                       |
| Case          | 125      | 9p13.2            | 9   | 37036475 | 37082433 | 45959     | Gain          | Yes          | -                                   | -                                                              |
| Case          | 185      | 9p13.1            | 9   | 38014458 | 38443584 | 429127    | Gain          | Yes          | <i>SHB; ALDH1B1; IGF1</i>           | -                                                              |
| Case          | 172      | 9p12              | 9   | 40519803 | 40781515 | 261713    | Loss          | Yes          | <i>SPATA31A3; ZNF658</i>            | -                                                              |
| Case          | 63       | 9p12              | 9   | 41590614 | 41975187 | 384574    | Gain          | Yes          | -                                   | -                                                              |
| Case          | 11       | 9p11.2            | 9   | 44054868 | 44181813 | 126946    | Loss          | -            | -                                   | -                                                              |
| Case          | 36       | 9p11.2            | 9   | 44936301 | 45506515 | 570215    | Gain          | Yes          | -                                   | -                                                              |
| Case          | 172      | 9q12              | 9   | 66405631 | 67489865 | 1084235   | Loss          | -            | -                                   | -                                                              |
| Case          | 351      | 9q12              | 9   | 67665657 | 67678367 | 12711     | Gain          | -            | -                                   | -                                                              |
| Case          | 387      | 9q12              | 9   | 67665657 | 67678367 | 12711     | Gain          | -            | -                                   | -                                                              |
| Case          | 352      | 9q12              | 9   | 67665657 | 67678367 | 12711     | Gain          | -            | -                                   | -                                                              |



| Sample Status | SampleID | Cytoband            | Chr | Start     | End       | Size (bp) | Gain/<br>Loss | Very<br>Rare | Protein-coding Genes in CNV | miRNAs in<br>CNV                       |
|---------------|----------|---------------------|-----|-----------|-----------|-----------|---------------|--------------|-----------------------------|----------------------------------------|
| Case          | 275      | 9q21.11             | 9   | 70936073  | 71057233  | 121161    | Gain          | Yes          | <i>TJP2</i>                 | -                                      |
| Case          | 38       | 9q21.11,<br>9q21.12 | 9   | 72107555  | 73072111  | 964557    | Loss          | Yes          | <i>SMC5; KLF9; TRPM3</i>    | hsa-miR-204-<br>5p; hsa-miR-<br>204-3p |
| Case          | 114      | 9q21.13,<br>9q21.12 | 9   | 73090924  | 73131120  | 40197     | Loss          | Yes          | -                           | -                                      |
| Case          | 195      | 9q21.13             | 9   | 76395452  | 76431510  | 36059     | Loss          | Yes          | -                           | -                                      |
| Case          | 304      | 9q21.32             | 9   | 84554591  | 84574064  | 19474     | Loss          | Yes          | -                           | -                                      |
| Case          | 191      | 9q21.33             | 9   | 88216358  | 88229203  | 12846     | Gain          |              | -                           | -                                      |
| Case          | 334      | 9q22.31             | 9   | 93283388  | 93299295  | 15908     | Loss          | Yes          | -                           | -                                      |
| Case          | 11       | 9q31.1              | 9   | 104718734 | 104788301 | 69568     | Loss          | Yes          | -                           | -                                      |
| Case          | 127      | 9q31.1              | 9   | 104753852 | 105039017 | 285166    | Gain          | Yes          | <i>CYLC2</i>                | -                                      |
| Case          | 299      | 9q31.1              | 9   | 105522059 | 105552367 | 30309     | Loss          | Yes          | -                           | -                                      |
| Case          | 150      | 9q31.2              | 9   | 107722843 | 108073934 | 351092    | Gain          | Yes          | -                           | -                                      |
| Case          | 121      | 9q32                | 9   | 114756929 | 114826862 | 69934     | Loss          | Yes          | <i>ZNF883</i>               | -                                      |
| Case          | 59       | 9q32                | 9   | 114756929 | 114826862 | 69934     | Loss          | Yes          | <i>ZNF883</i>               | -                                      |
| Case          | 209      | 9q32                | 9   | 114756929 | 114830080 | 73152     | Loss          | Yes          | <i>ZNF883</i>               | -                                      |
| Case          | 289      | 9q32                | 9   | 114764292 | 114785339 | 21048     | Loss          | Yes          | -                           | -                                      |
| Case          | 90       | 9q32                | 9   | 114796060 | 114860387 | 64328     | Loss          | Yes          | <i>ZNF883; ZFP37</i>        | -                                      |
| Case          | 232      | 9q32                | 9   | 114835733 | 114860387 | 24655     | Loss          |              | <i>ZFP37</i>                | -                                      |
| Case          | 88       | 9q33.1              | 9   | 118553273 | 118564313 | 11041     | Loss          | Yes          | -                           | -                                      |
| Case          | 63       | 9q33.2              | 9   | 122810257 | 122835329 | 25073     | Gain          | Yes          | <i>C5</i>                   | -                                      |
| Case          | 255      | 9q33.2              | 9   | 123751370 | 123776271 | 24902     | Gain          | Yes          | <i>TLL1</i>                 | -                                      |
| Case          | 187      | 9q34.11             | 9   | 131107625 | 131126566 | 18942     | Loss          | Yes          | <i>C9orf106</i>             | -                                      |
| Case          | 384      | 9q34.13             | 9   | 134588424 | 134729047 | 140624    | Gain          |              | <i>AK8</i>                  | -                                      |
| Case          | 280      | 10p15.3             | 10  | 1925387   | 1975931   | 50545     | Gain          |              | -                           | -                                      |
| Case          | 150      | 10p15.3             | 10  | 2394079   | 2757995   | 363917    | Gain          | Yes          | -                           | -                                      |
| Case          | 320      | 10p15.3             | 10  | 2411263   | 2532839   | 121577    | Loss          | Yes          | -                           | -                                      |
| Case          | 104      | 10p15.3             | 10  | 2631384   | 2642095   | 10712     | Loss          |              | -                           | -                                      |
| Case          | 132      | 10p15.1             | 10  | 4018881   | 4174635   | 155755    | Gain          | Yes          | -                           | hsa-miR-6078                           |
| Case          | 119      | 10p14               | 10  | 7672510   | 7684839   | 12330     | Loss          | Yes          | -                           | -                                      |
| Case          | 101      | 10p14               | 10  | 9050385   | 9171256   | 120872    | Loss          | Yes          | -                           | -                                      |
| Case          | 109      | 10p14               | 10  | 9121946   | 9159062   | 37117     | Loss          | Yes          | -                           | -                                      |

| Sample Status | SampleID | Cytoband              | Chr | Start     | End       | Size (bp) | Gain/<br>Loss | Very<br>Rare | Protein-coding Genes in CNV                                                                                                                                                                                                                                                                                                                        | miRNAs in<br>CNV |
|---------------|----------|-----------------------|-----|-----------|-----------|-----------|---------------|--------------|----------------------------------------------------------------------------------------------------------------------------------------------------------------------------------------------------------------------------------------------------------------------------------------------------------------------------------------------------|------------------|
| Case          | 39       | 10p13                 | 10  | 12567080  | 12624215  | 57136     | Loss          | Yes          | -                                                                                                                                                                                                                                                                                                                                                  | -                |
| Case          | 62       | 10p13                 | 10  | 13639905  | 13650873  | 10969     | Loss          | Yes          | -                                                                                                                                                                                                                                                                                                                                                  | -                |
| Case          | 322      | 10p12.33              | 10  | 19303986  | 19344499  | 40514     | Loss          | Yes          | -                                                                                                                                                                                                                                                                                                                                                  | -                |
| Case          | 348      | 10p12.32              | 10  | 20095312  | 20140825  | 45514     | Loss          | Yes          | -                                                                                                                                                                                                                                                                                                                                                  | -                |
| Case          | 92       | 10p12.31              | 10  | 22610397  | 22694681  | 84285     | Gain          | Yes          | <i>COMMD3; COMMD3-BM11; BM11; SPAG6</i>                                                                                                                                                                                                                                                                                                            | -                |
| Case          | 208      | 10p12.1               | 10  | 24563795  | 24585439  | 21645     | Gain          |              | -                                                                                                                                                                                                                                                                                                                                                  | -                |
| Case          | 228      | 10p11.22              | 10  | 31865783  | 31991902  | 126120    | Gain          | Yes          | -                                                                                                                                                                                                                                                                                                                                                  | -                |
| Case          | 39       | 10p11.22              | 10  | 33636052  | 34287407  | 651356    | Gain          | Yes          | <i>NRP1</i>                                                                                                                                                                                                                                                                                                                                        | -                |
| Case          | 12       | 10q11.21              | 10  | 42184107  | 42241672  | 57566     | Gain          | Yes          | -                                                                                                                                                                                                                                                                                                                                                  | -                |
|               |          |                       |     |           |           |           |               |              | <i>PTPN20A; PTPN20B; SYT15; GPRIN2;<br/>NPY4R; ANXA8; ANXA8L1; FAM25B;<br/>FAM25C; FAM25G; AGAP9; ANXA8L2;<br/>FAM21B; ZNF488; RBP3; GDF2; GDF10;<br/>FRMPD2; MAPK8; ARHGAP22; WDFY4;<br/>LRRC18; VSTM4; FAM170B; C10orf128;<br/>C10orf71; DRGX; ERCC6; PGBD3; ERCC6-<br/>PGBD3; SLC18A3; CHAT; C10orf53;<br/>OGDHL; PARG; AGAP8; AGAP7; MSMB;</i> |                  |
| Case          | 40       | 10q11.22,<br>10q11.23 | 10  | 45905767  | 51329450  | 5423684   | Gain          | Yes          | <i>NCOA4; TIMM23</i>                                                                                                                                                                                                                                                                                                                               | hsa-miR-4294     |
| Case          | 241      | 10q21.1               | 10  | 55049737  | 55061803  | 12067     | Gain          | Yes          | -                                                                                                                                                                                                                                                                                                                                                  | -                |
| Case          | 162      | 10q21.1               | 10  | 59152157  | 59175448  | 23292     | Gain          | Yes          | -                                                                                                                                                                                                                                                                                                                                                  | -                |
| Case          | 182      | 10q21.2               | 10  | 63704691  | 63798139  | 93449     | Gain          | Yes          | -                                                                                                                                                                                                                                                                                                                                                  | -                |
| Case          | 251      | 10q21.3               | 10  | 68056854  | 68112828  | 55975     | Loss          |              | -                                                                                                                                                                                                                                                                                                                                                  | -                |
| Case          | 216      | 10q21.3               | 10  | 68155579  | 68211267  | 55689     | Loss          | Yes          | <i>CTNNA3</i>                                                                                                                                                                                                                                                                                                                                      | -                |
| Case          | 142      | 10q22.3               | 10  | 78178548  | 78200056  | 21509     | Loss          |              | -                                                                                                                                                                                                                                                                                                                                                  | -                |
| Case          | 61       | 10q22.3               | 10  | 79728898  | 79923026  | 194129    | Gain          |              | -                                                                                                                                                                                                                                                                                                                                                  | -                |
| Case          | 125      | 10q23.1               | 10  | 83932045  | 83949133  | 17089     | Loss          |              | -                                                                                                                                                                                                                                                                                                                                                  | -                |
| Case          | 301      | 10q23.33              | 10  | 96621081  | 96750569  | 129489    | Gain          |              | <i>CYP2C9</i>                                                                                                                                                                                                                                                                                                                                      | -                |
| Case          | 307      | 10q24.32              | 10  | 103017023 | 103084996 | 67974     | Gain          | Yes          | -                                                                                                                                                                                                                                                                                                                                                  | -                |
| Case          | 369      | 10q24.33              | 10  | 105158016 | 105205006 | 46991     | Gain          |              | <i>PDCD11; CALHM2</i>                                                                                                                                                                                                                                                                                                                              | -                |
| Case          | 214      | 10q24.33              | 10  | 105637085 | 105666815 | 29731     | Loss          | Yes          | <i>OBFC1</i>                                                                                                                                                                                                                                                                                                                                       | -                |
| Case          | 274      | 10q25.1               | 10  | 109824374 | 109850732 | 26359     | Loss          | Yes          | -                                                                                                                                                                                                                                                                                                                                                  | -                |
| Case          | 334      | 10q25.1               | 10  | 109945939 | 109969070 | 23132     | Loss          | Yes          | -                                                                                                                                                                                                                                                                                                                                                  | -                |

| Sample Status | SampleID | Cytoband            | Chr | Start     | End       | Size (bp) | Gain/<br>Loss | Very<br>Rare | Protein-coding Genes in CNV                                               | miRNAs in<br>CNV                 |
|---------------|----------|---------------------|-----|-----------|-----------|-----------|---------------|--------------|---------------------------------------------------------------------------|----------------------------------|
| Case          | 206      | 10q25.1             | 10  | 110080534 | 110101965 | 21432     | Loss          | Yes          | -                                                                         | -                                |
| Case          | 290      | 10q25.1             | 10  | 111488655 | 111573722 | 85068     | Loss          | Yes          | -                                                                         | -                                |
| Case          | 200      | 10q25.3             | 10  | 116351384 | 116368810 | 17427     | Loss          | Yes          | <i>ABLIM1</i>                                                             | -                                |
| Case          | 354      | 10q26.12            | 10  | 122418404 | 122459873 | 41470     | Gain          | Yes          | -                                                                         | -                                |
| Case          | 6        | 10q26.3             | 10  | 132630798 | 132664292 | 33495     | Loss          | Yes          | -                                                                         | hsa-miR-378c                     |
| Case          | 381      | 10q26.3             | 10  | 133292806 | 133527333 | 234528    | Gain          |              | -                                                                         | -                                |
| Case          | 252      | 11p15.5             | 11  | 196767    | 267099    | 70333     | Gain          | Yes          | <i>BETIL; RIC8A; SIRT3; PSMD13</i>                                        | hsa-miR-6743-5p; hsa-miR-6743-3p |
| Case          | 273      | 11p15.5             | 11  | 853088    | 1030891   | 177804    | Gain          | Yes          | <i>AP2A2; MUC6; TSPAN4; CHID1</i>                                         | -                                |
| Case          | 188      | 11p15.4             | 11  | 3817748   | 3829039   | 11292     | Loss          | Yes          | -                                                                         | -                                |
| Case          | 222      | 11p15.4             | 11  | 4762510   | 4866960   | 104451    | Loss          |              | <i>OR52R1; OR51F2; OR51S1; OR51T1</i>                                     | -                                |
| Case          | 241      | 11p15.4             | 11  | 4931740   | 4943583   | 11844     | Gain          | Yes          | <i>OR51A2</i>                                                             | -                                |
| Case          | 129      | 11p15.4             | 11  | 8449074   | 8459706   | 10633     | Loss          | Yes          | <i>STK33</i>                                                              | -                                |
| Case          | 175      | 11p14.2,<br>11p14.3 | 11  | 25914227  | 26245377  | 331151    | Gain          | Yes          | -                                                                         | -                                |
| Case          | 201      | 11p13               | 11  | 31257606  | 31411551  | 153946    | Loss          | Yes          | <i>DCDC1; DNAJC24; IMMP1L</i>                                             | -                                |
| Case          | 335      | 11p13               | 11  | 34981897  | 35014363  | 32467     | Gain          |              | -                                                                         | -                                |
| Case          | 349      | 11p12               | 11  | 42331884  | 42342944  | 11061     | Loss          | Yes          | -                                                                         | -                                |
| Case          | 192      | 11p11.12            | 11  | 49763600  | 50258820  | 495221    | Gain          |              | <i>OR4C13; OR4C12</i>                                                     | -                                |
| Case          | 34       | 11q11               | 11  | 54458221  | 54691830  | 233610    | Gain          | Yes          | -                                                                         | -                                |
| Case          | 41       | 11q11               | 11  | 54530469  | 55119916  | 589448    | Gain          |              | <i>TRIM48; OR4A16; OR4A15; OR4C15; OR4C16</i>                             | -                                |
| Case          | 213      | 11q11               | 11  | 55119916  | 55130607  | 10692     | Loss          |              | <i>OR4C11</i>                                                             | -                                |
| Case          | 41       | 11q11               | 11  | 55217259  | 55465680  | 248422    | Gain          |              | <i>OR5D13; OR5D14; OR5L1; OR5D18; OR5L2; OR5D16; TRIM51; OR5W2; OR511</i> | -                                |
| Case          | 105      | 11q12.1             | 11  | 56495254  | 56526065  | 30812     | Gain          | Yes          | <i>OR5AK2</i>                                                             | -                                |
| Case          | 19       | 11q13.1             | 11  | 64972598  | 65095235  | 122638    | Loss          | Yes          | <i>SCYL1; LTBP3; SSSCA1</i>                                               | -                                |
| Case          | 72       | 11q13.1             | 11  | 65264181  | 65334918  | 70738     | Loss          | Yes          | <i>AP5B1; OVOLI</i>                                                       | -                                |
| Case          | 213      | 11q14.1             | 11  | 81329992  | 81359233  | 29242     | Gain          | Yes          | -                                                                         | -                                |
| Case          | 57       | 11q14.1             | 11  | 81948607  | 81998696  | 50090     | Gain          | Yes          | -                                                                         | -                                |
| Case          | 196      | 11q14.2             | 11  | 87174421  | 87278637  | 104217    | Loss          | Yes          | -                                                                         | -                                |
| Case          | 240      | 11q21               | 11  | 92336224  | 92346836  | 10613     | Loss          | Yes          | <i>MTNR1B</i>                                                             | -                                |
| Case          | 243      | 11q21               | 11  | 93360031  | 93643386  | 283356    | Gain          | Yes          | <i>HEPHL1; PANX1</i>                                                      | -                                |

| Sample Status | SampleID | Cytoband              | Chr | Start     | End       | Size (bp) | Gain/<br>Loss | Very<br>Rare | Protein-coding Genes in CNV            | miRNAs in<br>CNV |
|---------------|----------|-----------------------|-----|-----------|-----------|-----------|---------------|--------------|----------------------------------------|------------------|
| Case          | 121      | 11q21                 | 11  | 94017540  | 94138508  | 120969    | Loss          | Yes          | -                                      | -                |
| Case          | 233      | 11q21                 | 11  | 96445204  | 96464004  | 18801     | Gain          |              | -                                      | -                |
| Case          | 42       | 11q22.1               | 11  | 97224044  | 97850170  | 626127    | Loss          | Yes          | -                                      | -                |
| Case          | 116      | 11q22.3               | 11  | 102848464 | 102885522 | 37059     | Gain          |              | <i>DYNC2H1</i>                         | -                |
| Case          | 263      | 11q22.3               | 11  | 102848464 | 102885522 | 37059     | Gain          |              | <i>DYNC2H1</i>                         | -                |
| Case          | 292      | 11q22.3               | 11  | 104563347 | 104696787 | 133441    | Gain          | Yes          | -                                      | -                |
| Case          | 226      | 11q22.3               | 11  | 105006055 | 105018256 | 12202     | Loss          | Yes          | -                                      | -                |
| Case          | 48       | 11q22.3               | 11  | 108644957 | 108735552 | 90596     | Loss          | Yes          | -                                      | -                |
| Case          | 162      | 11q22.3               | 11  | 108644957 | 108735552 | 90596     | Loss          | Yes          | -                                      | -                |
| Case          | 8        | 11q23.3               | 11  | 115758391 | 115790236 | 31846     | Gain          |              | -                                      | -                |
| Case          | 207      | 11q23.3               | 11  | 119716422 | 119955568 | 239147    | Gain          | Yes          | <i>ARHGEF12</i>                        | -                |
| Case          | 140      | 11q24.2               | 11  | 126708727 | 126877141 | 168415    | Gain          | Yes          | -                                      | -                |
| Case          | 16       | 11q24.3               | 11  | 129166541 | 129279905 | 113365    | Gain          | Yes          | <i>TMEM45B; NFRKB; PRDM10</i>          | -                |
| Case          | 16       | 11q24.3               | 11  | 129320742 | 129464893 | 144152    | Gain          | Yes          | <i>PRDM10; APLP2</i>                   | -                |
| Case          | 240      | 11q25                 | 11  | 132329300 | 132771541 | 442242    | Gain          |              | -                                      | -                |
| Case          | 218      | 11q25                 | 11  | 132595241 | 132824676 | 229436    | Gain          | Yes          | -                                      | -                |
| Case          | 182      | 11q25                 | 11  | 133763352 | 133922969 | 159618    | Gain          |              | -                                      | -                |
| Case          | 160      | 11q25                 | 11  | 133852772 | 134123463 | 270692    | Loss          | Yes          | -                                      | -                |
| Case          | 184      | 12p13.33              | 12  | 49098     | 113864    | 64767     | Gain          |              | <i>IQSEC3</i>                          | -                |
| Case          | 78       | 12p13.33              | 12  | 865867    | 1023029   | 157163    | Gain          | Yes          | <i>ERCI; WNK1; RAD52</i>               | -                |
| Case          | 50       | 12p13.33              | 12  | 1255099   | 1624685   | 369587    | Loss          | Yes          | <i>ERCI; FBXL14; WNT5B</i>             | -                |
| Case          | 182      | 12p13.32              | 12  | 3246714   | 3282857   | 36144     | Gain          |              | <i>TSPAN9</i>                          | -                |
| Case          | 145      | 12p13.32,<br>12p13.31 | 12  | 5173668   | 5353699   | 180032    | Gain          | Yes          | -                                      | -                |
| Case          | 208      | 12p13.31              | 12  | 6837052   | 6911616   | 74565     | Loss          | Yes          | <i>USP5; TPI1; SPSB2; LRRC23; ENO2</i> | -                |
| Case          | 120      | 12p13.1               | 12  | 14701818  | 14748413  | 46596     | Gain          | Yes          | <i>GUCY2C</i>                          | -                |
| Case          | 131      | 12p12.2,<br>12p12.1   | 12  | 20899011  | 21301356  | 402346    | Loss          |              | <i>SLCO1B3; SLCO1B7; SLCO1B1</i>       | -                |
| Case          | 79       | 12p12.1               | 12  | 23826011  | 23837471  | 11461     | Loss          | Yes          | -                                      | -                |
| Case          | 81       | 12p12.1               | 12  | 24063813  | 24088917  | 25105     | Loss          | Yes          | -                                      | -                |
| Case          | 82       | 12p12.1               | 12  | 24561569  | 24597505  | 35937     | Loss          | Yes          | -                                      | -                |
| Case          | 75       | 12p11.22              | 12  | 29097338  | 29113119  | 15782     | Gain          |              | -                                      | -                |
| Case          | 84       | 12p11.21              | 12  | 32679398  | 32727326  | 47929     | Gain          | Yes          | <i>FGD4; DNMI1</i>                     | -                |

| Sample Status | SampleID | Cytoband            | Chr | Start     | End       | Size (bp) | Gain/<br>Loss | Very<br>Rare | Protein-coding Genes in CNV                                                                   | miRNAs in<br>CNV                                                    |
|---------------|----------|---------------------|-----|-----------|-----------|-----------|---------------|--------------|-----------------------------------------------------------------------------------------------|---------------------------------------------------------------------|
| Case          | 168      | 12q12               | 12  | 43324243  | 43341561  | 17319     | Gain          | Yes          | -                                                                                             | -                                                                   |
| Case          | 358      | 12q12               | 12  | 44313582  | 44332028  | 18447     | Gain          |              | -                                                                                             | -                                                                   |
| Case          | 312      | 12q13.11            | 12  | 45621796  | 45653693  | 31898     | Loss          | Yes          | -                                                                                             | -                                                                   |
| Case          | 190      | 12q13.13            | 12  | 51067730  | 51383458  | 315729    | Gain          | Yes          | <i>KRT82; KRT75; KRT6B; KRT6C; KRT6A; KRT5; KRT71; KRT74; KRT72; KRT73; KRT2; KRT1; KRT77</i> | -                                                                   |
| Case          | 314      | 12q13.3             | 12  | 55479708  | 55553901  | 74194     | Loss          | Yes          | -                                                                                             | -                                                                   |
| Case          | 186      | 12q14.1             | 12  | 58421479  | 58445012  | 23534     | Loss          | Yes          | -                                                                                             | -                                                                   |
| Case          | 237      | 12q14.1             | 12  | 60075246  | 60114390  | 39145     | Gain          |              | -                                                                                             | -                                                                   |
| Case          | 110      | 12q21.1             | 12  | 71517646  | 71654154  | 136509    | Loss          | Yes          | -                                                                                             | -                                                                   |
| Case          | 327      | 12q21.1             | 12  | 72632531  | 72768849  | 136319    | Loss          |              | -                                                                                             | -                                                                   |
| Case          | 39       | 12q21.31            | 12  | 79255527  | 79823534  | 568008    | Gain          | Yes          | <i>OTOGL; PTPRQ; MYF6; MYF5; LIN7A</i>                                                        | hsa-miR-617                                                         |
| Case          | 44       | 12q21.31            | 12  | 79679461  | 81076827  | 1397367   | Loss          | Yes          | <i>LIN7A; ACSS3; PPFIA2</i>                                                                   | hsa-miR-617;<br>hsa-miR-618;<br>hsa-miR-4699-5p;<br>hsa-miR-4699-3p |
| Case          | 114      | 12q21.32            | 12  | 86523522  | 86566812  | 43291     | Gain          | Yes          | -                                                                                             | -                                                                   |
| Case          | 124      | 12q21.32            | 12  | 86757016  | 86773979  | 16964     | Loss          | Yes          | -                                                                                             | -                                                                   |
| Case          | 277      | 12q23.1             | 12  | 96598149  | 96662256  | 64108     | Loss          | Yes          | -                                                                                             | -                                                                   |
| Case          | 117      | 12q23.1             | 12  | 98761881  | 98817201  | 55321     | Loss          |              | -                                                                                             | -                                                                   |
| Case          | 102      | 12q24.11            | 12  | 107986824 | 108079800 | 92977     | Gain          | Yes          | <i>USP30; ALKBH2; UNG; ACACB</i>                                                              | -                                                                   |
| Case          | 56       | 12q24.32            | 12  | 126218723 | 126234808 | 16086     | Loss          | Yes          | -                                                                                             | -                                                                   |
| Case          | 274      | 12q24.32            | 12  | 127119918 | 127159179 | 39262     | Loss          | Yes          | -                                                                                             | -                                                                   |
| Case          | 211      | 12q24.33            | 12  | 131933656 | 132034386 | 100731    | Gain          | Yes          | <i>CHFR; ZNF605</i>                                                                           | -                                                                   |
| Case          | 39       | 13q12.11            | 13  | 19694803  | 20009112  | 314310    | Loss          |              | <i>GJB6; CRYL1</i>                                                                            | hsa-miR-4499                                                        |
| Case          | 177      | 13q12.12            | 13  | 23331104  | 23374073  | 42970     | Gain          |              | <i>MIPEP; CIQTNF9B; CIQTNF9B-AS1</i>                                                          | -                                                                   |
| Case          | 391      | 13q12.12            | 13  | 24170898  | 24231779  | 60882     | Gain          |              | <i>ATP12A</i>                                                                                 | -                                                                   |
| Case          | 300      | 13q12.3             | 13  | 30624099  | 30783812  | 159714    | Gain          |              | <i>HSPH1; B3GALTL</i>                                                                         | -                                                                   |
| Case          | 370      | 13q12.3             | 13  | 30624099  | 30783812  | 159714    | Gain          |              | <i>HSPH1; B3GALTL</i>                                                                         | -                                                                   |
| Case          | 148      | 13q12.3             | 13  | 30624099  | 30783812  | 159714    | Gain          |              | <i>HSPH1; B3GALTL</i>                                                                         | -                                                                   |
| Case          | 45       | 13q13.1,<br>13q13.2 | 13  | 32108632  | 34542657  | 2434026   | Loss          | Yes          | <i>PDS5B; KL; STARD13; RFC3; NBEA</i>                                                         | -                                                                   |
| Case          | 53       | 13q13.2             | 13  | 33376004  | 33476333  | 100330    | Gain          | Yes          | <i>RFC3</i>                                                                                   | -                                                                   |

| Sample Status | SampleID | Cytoband              | Chr | Start     | End       | Size (bp) | Gain/<br>Loss | Very<br>Rare | Protein-coding Genes in CNV    | miRNAs in<br>CNV |
|---------------|----------|-----------------------|-----|-----------|-----------|-----------|---------------|--------------|--------------------------------|------------------|
| Case          | 347      | 13q13.2               | 13  | 34149941  | 34229976  | 80036     | Loss          | -            |                                | -                |
| Case          | 318      | 13q14.3               | 13  | 52015880  | 52187439  | 171560    | Gain          |              | <i>HNRNPAIL2; SUGT1; LECT1</i> | -                |
| Case          | 310      | 13q21.1               | 13  | 54041427  | 54376560  | 335134    | Loss          | Yes          | -                              | -                |
| Case          | 47       | 13q21.1               | 13  | 54088942  | 54110422  | 21481     | Loss          | Yes          | -                              | -                |
| Case          | 142      | 13q21.1               | 13  | 54924042  | 54999011  | 74970     | Loss          | Yes          | -                              | -                |
| Case          | 108      | 13q21.1               | 13  | 56500151  | 56563112  | 62962     | Gain          | Yes          | -                              | -                |
| Case          | 195      | 13q21.31              | 13  | 60537232  | 60579628  | 42397     | Gain          | Yes          | -                              | -                |
| Case          | 322      | 13q21.31              | 13  | 61992675  | 62045822  | 53148     | Gain          |              | -                              | -                |
| Case          | 331      | 13q21.31              | 13  | 63160209  | 63187317  | 27109     | Gain          | Yes          | -                              | -                |
| Case          | 46       | 13q21.33,<br>13q21.32 | 13  | 66742848  | 67736281  | 993434    | Gain          | Yes          | -                              | -                |
| Case          | 121      | 13q21.33              | 13  | 67817205  | 67838362  | 21158     | Gain          | Yes          | -                              | -                |
| Case          | 257      | 13q21.33              | 13  | 67857627  | 67893136  | 35510     | Loss          | Yes          | -                              | -                |
| Case          | 261      | 13q21.33              | 13  | 69946172  | 69985840  | 39669     | Gain          | Yes          | -                              | -                |
| Case          | 233      | 13q21.33              | 13  | 70103780  | 70142908  | 39129     | Loss          | Yes          | -                              | -                |
| Case          | 316      | 13q21.33              | 13  | 71962732  | 71973205  | 10474     | Loss          | Yes          | -                              | -                |
| Case          | 240      | 13q22.2               | 13  | 74234986  | 74272359  | 37374     | Loss          | Yes          | -                              | -                |
| Case          | 52       | 13q22.3               | 13  | 76857347  | 76954200  | 96854     | Gain          | Yes          | -                              | -                |
| Case          | 47       | 13q22.3               | 13  | 77549464  | 77560694  | 11231     | Gain          | Yes          | -                              | -                |
| Case          | 221      | 13q31.1               | 13  | 79111809  | 79133076  | 21268     | Loss          | Yes          | -                              | -                |
| Case          | 224      | 13q31.1               | 13  | 79113330  | 79133076  | 19747     | Loss          | Yes          | -                              | -                |
| Case          | 103      | 13q31.1               | 13  | 81566239  | 81615070  | 48832     | Gain          | Yes          | -                              | -                |
| Case          | 121      | 13q31.1               | 13  | 82086779  | 82100192  | 13414     | Gain          |              | -                              | -                |
| Case          | 154      | 13q31.1               | 13  | 82086779  | 82101299  | 14521     | Gain          |              | -                              | -                |
| Case          | 179      | 13q31.1               | 13  | 82086779  | 82101299  | 14521     | Gain          |              | -                              | -                |
| Case          | 124      | 13q31.1               | 13  | 83594161  | 83810310  | 216150    | Gain          | Yes          | -                              | -                |
| Case          | 102      | 13q31.1               | 13  | 84754135  | 84765621  | 11487     | Gain          |              | -                              | -                |
| Case          | 114      | 13q31.1               | 13  | 85507219  | 85564135  | 56917     | Gain          | Yes          | -                              | -                |
| Case          | 265      | 13q31.1               | 13  | 86019752  | 86228251  | 208500    | Loss          | Yes          | -                              | -                |
| Case          | 177      | 13q31.3               | 13  | 89662891  | 89699054  | 36164     | Loss          | Yes          | -                              | hsa-miR-622      |
| Case          | 261      | 13q31.3               | 13  | 91706891  | 91802671  | 95781     | Loss          | Yes          | -                              | -                |
| Case          | 283      | 13q32.2               | 13  | 97244077  | 97255922  | 11846     | Loss          | Yes          | -                              | -                |
| Case          | 158      | 13q33.1               | 13  | 100941124 | 100983195 | 42072     | Loss          | Yes          | -                              | -                |

| Sample Status | SampleID | Cytoband                  | Chr | Start     | End       | Size (bp) | Gain/<br>Loss | Very<br>Rare | Protein-coding Genes in CNV           | miRNAs in<br>CNV                                 |
|---------------|----------|---------------------------|-----|-----------|-----------|-----------|---------------|--------------|---------------------------------------|--------------------------------------------------|
| Case          | 158      | 13q33.1                   | 13  | 101048595 | 101091527 | 42933     | Loss          | Yes          | <i>ITGBL1</i>                         | -                                                |
| Case          | 355      | 13q34                     | 13  | 109543585 | 109558627 | 15043     | Loss          |              | -                                     | -                                                |
| Case          | 148      | 13q34                     | 13  | 113003498 | 113073437 | 69940     | Gain          | Yes          | <i>LAMP1; GRTP1</i>                   | -                                                |
| Case          | 148      | 13q34                     | 13  | 113130707 | 113314758 | 184052    | Gain          | Yes          | <i>ADPRHL1; DCUNID2; TMC03; TFDPI</i> | -                                                |
| Case          | 148      | 13q34                     | 13  | 113835690 | 114063831 | 228142    | Gain          | Yes          | <i>RASA3; CDC16</i>                   | hsa-miR-548ar-5p; hsa-miR-548ar-3p; hsa-miR-4502 |
| Case          | 299      | 14q11.2                   | 14  | 19759573  | 19786776  | 27204     | Gain          |              | <i>OR11H6; OR11H4</i>                 | -                                                |
| Case          | 271      | 14q11.2                   | 14  | 21567040  | 22030610  | 463571    | Gain          | Yes          | -                                     | -                                                |
| Case          | 120      | 14q11.2                   | 14  | 21575160  | 22034877  | 459718    | Loss          |              | -                                     | -                                                |
| Case          | 165      | 14q11.2                   | 14  | 21575160  | 22034877  | 459718    | Loss          |              | -                                     | -                                                |
| Case          | 156      | 14q11.2                   | 14  | 21773188  | 21874390  | 101203    | Gain          | Yes          | -                                     | -                                                |
| Case          | 66       | 14q11.2                   | 14  | 21835787  | 22013589  | 177803    | Gain          | Yes          | -                                     | -                                                |
| Case          | 156      | 14q11.2                   | 14  | 21935894  | 22030672  | 94779     | Gain          | Yes          | -                                     | -                                                |
| Case          | 12       | 14q11.2                   | 14  | 22228539  | 22334076  | 105538    | Gain          | Yes          | <i>OXAIL; SLC7A7</i>                  | -                                                |
| Case          | 168      | 14q12                     | 14  | 26628908  | 26724585  | 95678     | Loss          |              | -                                     | -                                                |
| Case          | 376      | 14q12                     | 14  | 26628908  | 26724585  | 95678     | Loss          |              | -                                     | -                                                |
| Case          | 173      | 14q12                     | 14  | 26628908  | 26724585  | 95678     | Loss          |              | -                                     | -                                                |
| Case          | 324      | 14q12                     | 14  | 26973659  | 27106877  | 133219    | Loss          |              | -                                     | -                                                |
| Case          | 42       | 14q21.1                   | 14  | 38022752  | 38114064  | 91313     | Loss          |              | -                                     | -                                                |
| Case          | 47       | 14q21.1, 14q21.2, 14q21.3 | 14  | 40497844  | 43269768  | 2771925   | Gain          | Yes          | <i>LRFN5</i>                          | -                                                |
| Case          | 93       | 14q21.3                   | 14  | 44165840  | 44192849  | 27010     | Gain          | Yes          | -                                     | -                                                |
| Case          | 326      | 14q21.3                   | 14  | 45261504  | 45300795  | 39292     | Loss          | Yes          | -                                     | -                                                |
| Case          | 254      | 14q21.3                   | 14  | 45451570  | 45545680  | 94111     | Loss          | Yes          | -                                     | -                                                |
| Case          | 257      | 14q23.3                   | 14  | 66122811  | 66151073  | 28263     | Loss          |              | -                                     | -                                                |
| Case          | 254      | 14q24.3                   | 14  | 76394412  | 76448061  | 53650     | Gain          | Yes          | <i>C14orf166B</i>                     | -                                                |
| Case          | 224      | 14q31.1                   | 14  | 78793393  | 78814026  | 20634     | Loss          | Yes          | -                                     | -                                                |
| Case          | 13       | 14q31.3                   | 14  | 84302948  | 84356082  | 53135     | Gain          | Yes          | -                                     | -                                                |
| Case          | 154      | 14q31.3                   | 14  | 84613560  | 84636868  | 23309     | Gain          | Yes          | -                                     | -                                                |
| Case          | 119      | 14q31.3                   | 14  | 84919906  | 84968497  | 48592     | Loss          | Yes          | -                                     | -                                                |
| Case          | 76       | 14q31.3                   | 14  | 85959121  | 86048278  | 89158     | Loss          |              | -                                     | -                                                |

| Sample Status | SampleID | Cytoband                      | Chr | Start     | End       | Size (bp) | Gain/<br>Loss | Very<br>Rare | Protein-coding Genes in CNV                                                                                                                            | miRNAs in<br>CNV                                                                       |
|---------------|----------|-------------------------------|-----|-----------|-----------|-----------|---------------|--------------|--------------------------------------------------------------------------------------------------------------------------------------------------------|----------------------------------------------------------------------------------------|
| Case          | 97       | 14q31.3                       | 14  | 86197943  | 86220810  | 22868     | Gain          | Yes          | -                                                                                                                                                      | -                                                                                      |
| Case          | 294      | 14q32.13                      | 14  | 94392551  | 94417096  | 24546     | Gain          | Yes          | -                                                                                                                                                      | -                                                                                      |
| Case          | 153      | 14q32.2                       | 14  | 97319155  | 97340577  | 21423     | Loss          | Yes          | -                                                                                                                                                      | -                                                                                      |
| Case          | 163      | 14q32.33                      | 14  | 104854470 | 105035738 | 181269    | Gain          | Yes          | <i>PACS2; TEX22; MTA1; CRIP2; CRIP1; C14orf80</i>                                                                                                      | -                                                                                      |
| Case          | 156      | 14q32.33                      | 14  | 105265522 | 106160517 | 894996    | Loss          | -            | -                                                                                                                                                      | hsa-miR-4539;<br>hsa-miR-4507;<br>hsa-miR-4538;<br>hsa-miR-4537                        |
| Case          | 280      | 14q32.33                      | 14  | 105268160 | 105920721 | 652562    | Loss          | -            | -                                                                                                                                                      | hsa-miR-4539;<br>hsa-miR-4507;<br>hsa-miR-4538;<br>hsa-miR-4537                        |
| Case          | 153      | 14q32.33                      | 14  | 105413362 | 105601732 | 188371    | Loss          | -            | -                                                                                                                                                      | -                                                                                      |
| Case          | 274      | 14q32.33                      | 14  | 105413362 | 105598011 | 184650    | Loss          | -            | -                                                                                                                                                      | -                                                                                      |
| Case          | 325      | 14q32.33                      | 14  | 106224112 | 106276784 | 52673     | Gain          | -            | -                                                                                                                                                      | -                                                                                      |
| Case          | 247      | 14q32.33                      | 14  | 106325131 | 106356482 | 31352     | Gain          | -            | -                                                                                                                                                      | hsa-miR-5195-5p;<br>hsa-miR-5195-3p                                                    |
| Case          | 48       | 15q11.2,<br>15q13.1,<br>15q12 | 15  | 20224763  | 26723209  | 6498447   | Gain          | Yes          | <i>NPAP1; SNURF; SNRPN; UBE3A; ATP10A; GABRB3; GABRA5; GABRG3; OCA2; HERC2; GOLGA6L1; TUBGCP5; CYFIP1; NIPA2; NIPA1; LOC440243; MKRN3; MAGEL2; NDN</i> | hsa-miR-4715-5p;<br>hsa-miR-4715-3p;<br>hsa-miR-4509;<br>hsa-miR-4509;<br>hsa-miR-4508 |
| Case          | 49       | 15q11.2,<br>15q13.1,<br>15q12 | 15  | 21192955  | 26873178  | 5680224   | Gain          | Yes          | <i>MKRN3; MAGEL2; NDN; NPAP1; SNURF; SNRPN; UBE3A; ATP10A; GABRB3; GABRA5; GABRG3; OCA2; HERC2</i>                                                     | hsa-miR-4508;<br>hsa-miR-4715-5p;<br>hsa-miR-4715-3p;<br>hsa-miR-4509                  |
| Case          | 50       | 15q11.2,<br>15q13.1,<br>15q12 | 15  | 21192955  | 26208003  | 5015049   | Gain          | Yes          | <i>NPAP1; SNURF; SNRPN; UBE3A; ATP10A; GABRB3; GABRA5; GABRG3; OCA2; HERC2; MKRN3; MAGEL2; NDN</i>                                                     | hsa-miR-4715-5p;<br>hsa-miR-4715-3p;<br>hsa-miR-4508                                   |
| Case          | 311      | 15q11.2                       | 15  | 22161116  | 22276385  | 115270    | Gain          | -            | -                                                                                                                                                      | -                                                                                      |
| Case          | 334      | 15q11.2                       | 15  | 22842424  | 22882268  | 39845     | Gain          | -            | -                                                                                                                                                      | -                                                                                      |



| Sample Status | SampleID | Cytoband            | Chr | Start    | End      | Size (bp) | Gain/<br>Loss | Very<br>Rare | Protein-coding Genes in CNV                                             | miRNAs in<br>CNV               |
|---------------|----------|---------------------|-----|----------|----------|-----------|---------------|--------------|-------------------------------------------------------------------------|--------------------------------|
| Case          | 220      | 15q11.2             | 15  | 22842424 | 22882268 | 39845     | Gain          | -            |                                                                         | -                              |
| Case          | 230      | 15q11.2             | 15  | 22961502 | 23004107 | 42606     | Gain          | -            |                                                                         | -                              |
| Case          | 237      | 15q11.2             | 15  | 22961502 | 23004107 | 42606     | Gain          | -            |                                                                         | -                              |
| Case          | 262      | 15q11.2             | 15  | 22961502 | 23004107 | 42606     | Gain          | -            |                                                                         | -                              |
| Case          | 275      | 15q11.2             | 15  | 22961502 | 23004107 | 42606     | Gain          | -            |                                                                         | -                              |
| Case          | 103      | 15q11.2             | 15  | 22968217 | 23003805 | 35589     | Gain          | -            |                                                                         | -                              |
| Case          | 360      | 15q11.2             | 15  | 22968217 | 23003805 | 35589     | Gain          | -            |                                                                         | -                              |
| Case          | 58       | 15q11.2             | 15  | 22968217 | 23003805 | 35589     | Gain          | -            |                                                                         | -                              |
| Case          | 334      | 15q11.2             | 15  | 22968217 | 23003805 | 35589     | Gain          | -            |                                                                         | -                              |
| Case          | 51       | 15q13.1,<br>15q12   | 15  | 23766255 | 26203954 | 2437700   | Gain          | Yes          | <i>GABRB3; GABRA5; GABRG3; OCA2; HERC2</i>                              | -                              |
| Case          | 235      | 15q12               | 15  | 24090400 | 24101953 | 11554     | Loss          | Yes          | -                                                                       | -                              |
| Case          | 344      | 15q12               | 15  | 25504394 | 25524868 | 20475     | Gain          | Yes          | -                                                                       | -                              |
| Case          | 36       | 15q13.2             | 15  | 28153539 | 28717792 | 564254    | Gain          | Yes          | <i>CHRFAM7A; ARHGAP11B</i>                                              | -                              |
| Case          | 52       | 15q13.2,<br>15q13.3 | 15  | 28608929 | 30299512 | 1690584   | Loss          | Yes          | <i>ARHGAP11B; FAN1; MTMR10; TRPM1; LOC283710; KLF13; OTUD7A; CHRNA7</i> | hsa-miR-211-5p; hsa-miR-211-3p |
| Case          | 2        | 15q13.3             | 15  | 29097455 | 29125653 | 28199     | Gain          | Yes          | <i>TRPM1</i>                                                            | -                              |
| Case          | 282      | 15q13.3             | 15  | 30245953 | 30299512 | 53560     | Loss          |              | <i>CHRNA7</i>                                                           | -                              |
| Case          | 390      | 15q13.3             | 15  | 30291556 | 30320383 | 28828     | Loss          |              | -                                                                       | -                              |
| Case          | 251      | 15q14               | 15  | 31939673 | 31970438 | 30766     | Gain          | Yes          | <i>RYR3; AVEN</i>                                                       | -                              |
| Case          | 29       | 15q14               | 15  | 33113782 | 33133647 | 19866     | Loss          | Yes          | -                                                                       | -                              |
| Case          | 311      | 15q14               | 15  | 36830660 | 36841548 | 10889     | Loss          | Yes          | -                                                                       | -                              |
| Case          | 63       | 15q21.1             | 15  | 43781873 | 43936568 | 154696    | Loss          |              | -                                                                       | -                              |
| Case          | 216      | 15q21.2             | 15  | 48882605 | 48968126 | 85522     | Gain          | Yes          | -                                                                       | -                              |
| Case          | 379      | 15q21.2             | 15  | 50782941 | 50828102 | 45162     | Gain          |              | -                                                                       | -                              |
| Case          | 128      | 15q21.3             | 15  | 52288401 | 52309659 | 21259     | Loss          | Yes          | -                                                                       | -                              |
| Case          | 21       | 15q22.2             | 15  | 57862260 | 57891107 | 28848     | Loss          | Yes          | -                                                                       | -                              |
| Case          | 161      | 15q23               | 15  | 67295221 | 67307974 | 12754     | Gain          | Yes          | -                                                                       | -                              |
| Case          | 24       | 15q24.2             | 15  | 73205376 | 73233436 | 28061     | Gain          | Yes          | -                                                                       | -                              |
| Case          | 212      | 15q24.3             | 15  | 74678296 | 74698888 | 20593     | Gain          | Yes          | -                                                                       | -                              |
| Case          | 82       | 15q25.2             | 15  | 81042381 | 81265143 | 222763    | Gain          | Yes          | <i>CPEB1; AP3B2; FSD2</i>                                               | -                              |
| Case          | 103      | 15q25.3             | 15  | 84499004 | 84530725 | 31722     | Loss          | Yes          | <i>AGBL1</i>                                                            | -                              |

| Sample Status | SampleID | Cytoband | Chr | Start    | End       | Size (bp) | Gain/<br>Loss | Very<br>Rare | Protein-coding Genes in CNV                      | miRNAs in<br>CNV |
|---------------|----------|----------|-----|----------|-----------|-----------|---------------|--------------|--------------------------------------------------|------------------|
| Case          | 263      | 15q26.1  | 15  | 91753155 | 91804301  | 51147     | Loss          | Yes          | -                                                | -                |
| Case          | 254      | 15q26.3  | 15  | 96317626 | 96423019  | 105394    | Loss          | Yes          | -                                                | -                |
| Case          | 9        | 15q26.3  | 15  | 98203369 | 98319816  | 116448    | Loss          |              | -                                                | -                |
| Case          | 208      | 15q26.3  | 15  | 99848867 | 100128781 | 279915    | Gain          |              | <i>TM2D3; TARSL2</i>                             | -                |
| Case          | 90       | 15q26.3  | 15  | 99975987 | 100071796 | 95810     | Gain          | Yes          | <i>TM2D3; TARSL2</i>                             | -                |
| Case          | 265      | 15q26.3  | 15  | 99975987 | 100061550 | 85564     | Gain          | Yes          | <i>TM2D3; TARSL2</i>                             | -                |
| Case          | 237      | 16p13.3  | 16  | 725280   | 838329    | 113050    | Gain          |              | <i>NARFL; MSLN; RPUSD1; CHTF18; GNGI3; PRR25</i> | hsa-miR-662      |
| Case          | 331      | 16p13.3  | 16  | 3634773  | 3659345   | 24573     | Loss          |              | <i>DNASE1; TRAP1</i>                             | -                |
| Case          | 206      | 16p13.3  | 16  | 4465283  | 4551760   | 86478     | Loss          | Yes          | <i>HMOX2; CDIP1; C16orf96</i>                    | -                |
| Case          | 232      | 16p13.3  | 16  | 4589721  | 4636655   | 46935     | Loss          | Yes          | <i>C16orf96; UBALD1; MGRN1</i>                   | -                |
| Case          | 54       | 16p13.3  | 16  | 6171253  | 6203634   | 32382     | Loss          | Yes          | -                                                | -                |
| Case          | 332      | 16p13.2  | 16  | 6565423  | 6610859   | 45437     | Loss          |              | -                                                | -                |
| Case          | 85       | 16p13.2  | 16  | 6754460  | 6805109   | 50650     | Loss          | Yes          | -                                                | -                |
| Case          | 87       | 16p13.2  | 16  | 6973749  | 7078712   | 104964    | Loss          | Yes          | <i>RBFOX1</i>                                    | -                |
| Case          | 62       | 16p13.2  | 16  | 6992360  | 7136112   | 143753    | Loss          | Yes          | <i>RBFOX1</i>                                    | -                |
| Case          | 202      | 16p13.2  | 16  | 7047357  | 7070975   | 23619     | Loss          |              | -                                                | -                |
| Case          | 215      | 16p13.2  | 16  | 8679882  | 8815472   | 135591    | Gain          | Yes          | <i>ABAT; TMEM186; PMM2</i>                       | -                |
| Case          | 32       | 16p13.2  | 16  | 9982679  | 9993631   | 10953     | Loss          | Yes          | -                                                | -                |
| Case          | 347      | 16p13.13 | 16  | 10310012 | 10331132  | 21121     | Loss          |              | -                                                | -                |
| Case          | 296      | 16p13.13 | 16  | 11515745 | 11545689  | 29945     | Gain          | Yes          | -                                                | -                |
| Case          | 176      | 16p13.12 | 16  | 12554682 | 12623894  | 69213     | Loss          | Yes          | <i>SNX29</i>                                     | -                |
| Case          | 101      | 16p13.12 | 16  | 12629008 | 12643485  | 14478     | Loss          | Yes          | -                                                | -                |

| Sample Status | SampleID | Cytoband | Chr | Start    | End      | Size (bp) | Gain/<br>Loss | Very<br>Rare | Protein-coding Genes in CNV                                                                                            | miRNAs in<br>CNV                                                                                                                                                                                                    |
|---------------|----------|----------|-----|----------|----------|-----------|---------------|--------------|------------------------------------------------------------------------------------------------------------------------|---------------------------------------------------------------------------------------------------------------------------------------------------------------------------------------------------------------------|
| Case          | 53       | 16p13.11 | 16  | 14805302 | 16304013 | 1498712   | Gain          |              | <i>NOMO1; NPIPA1; PDXDC1; NTANI; RRN3; NPIPA5; MPV17L; C16orf45; KIAA0430; NDE1; MYH11; FOPNL; ABCC1; ABCC6; NOMO3</i> | hsa-miR-3179;<br>hsa-miR-3670;<br>hsa-miR-3180-5p; hsa-miR-3180-3p; hsa-miR-6511a-5p; hsa-miR-6511a-3p; hsa-miR-6770-5p; hsa-miR-6770-3p; hsa-miR-1972; hsa-miR-3180; hsa-miR-6506-5p; hsa-miR-6506-3p; hsa-miR-484 |
| Case          | 54       | 16p13.11 | 16  | 15032942 | 16421139 | 1388198   | Gain          |              | <i>PDXDC1; NTANI; RRN3; NPIPA5; MPV17L; C16orf45; KIAA0430; NDE1; MYH11; FOPNL; ABCC1; ABCC6; NOMO3</i>                | hsa-miR-3180; hsa-miR-6506-5p; hsa-miR-6506-3p; hsa-miR-484; hsa-miR-3179; hsa-miR-3670; hsa-miR-3180-5p; hsa-miR-3180-3p; hsa-miR-6511a-5p; hsa-miR-6511a-3p                                                       |
| Case          | 174      | 16p13.11 | 16  | 15888009 | 15931537 | 43529     | Gain          | Yes          | <i>FOPNL</i>                                                                                                           | -                                                                                                                                                                                                                   |
| Case          | 203      | 16p12.3  | 16  | 19016148 | 19030244 | 14097     | Loss          | Yes          | -                                                                                                                      | -                                                                                                                                                                                                                   |
| Case          | 219      | 16p12.3  | 16  | 19657507 | 19711347 | 53841     | Gain          | Yes          | <i>IQCK</i>                                                                                                            | -                                                                                                                                                                                                                   |
| Case          | 109      | 16p12.3  | 16  | 20453353 | 20464612 | 11260     | Loss          | Yes          | <i>ACSM2B</i>                                                                                                          | -                                                                                                                                                                                                                   |
| Case          | 114      | 16p12.1  | 16  | 21958109 | 22003654 | 45546     | Gain          | Yes          | <i>C16orf52</i>                                                                                                        | -                                                                                                                                                                                                                   |
| Case          | 253      | 16p12.1  | 16  | 23795684 | 23810657 | 14974     | Loss          | Yes          | -                                                                                                                      | -                                                                                                                                                                                                                   |
| Case          | 18       | 16p11.2  | 16  | 28731428 | 28779467 | 48040     | Gain          | Yes          | <i>ATXN2L; TUFM</i>                                                                                                    | hsa-miR-4721                                                                                                                                                                                                        |
| Case          | 18       | 16p11.2  | 16  | 28864929 | 28933479 | 68551     | Gain          | Yes          | <i>NFATC2IP; SPNS1; LAT</i>                                                                                            | hsa-miR-4517                                                                                                                                                                                                        |

| Sample Status | SampleID | Cytoband            | Chr | Start    | End      | Size (bp) | Gain/<br>Loss | Very<br>Rare | Protein-coding Genes in CNV                                                                                                                                                                                                                             | miRNAs in<br>CNV                 |
|---------------|----------|---------------------|-----|----------|----------|-----------|---------------|--------------|---------------------------------------------------------------------------------------------------------------------------------------------------------------------------------------------------------------------------------------------------------|----------------------------------|
| Case          | 55       | 16p11.2             | 16  | 29474810 | 30099408 | 624599    | Gain          | Yes          | <i>SPN; QPRT; C16orf54; ZG16; KIF22; MAZ; PRRT2; PAGR1; MVP; CDIPT; SEZ6L2; ASPHD1; KCTD13; TMEM219; TAOK2; HIRIP3; INO80E; DOC2A; C16orf92; FAM57B; ALDOA; PPP4C; TBX6; YPEL3; GDPD3; MAPK3</i>                                                        | hsa-miR-3680-5p; hsa-miR-3680-3p |
| Case          | 56       | 16p11.2             | 16  | 29474810 | 30134444 | 659635    | Gain          | Yes          | <i>SPN; QPRT; C16orf54; ZG16; KIF22; MAZ; PRRT2; PAGR1; MVP; CDIPT; SEZ6L2; ASPHD1; KCTD13; TMEM219; TAOK2; HIRIP3; INO80E; DOC2A; C16orf92; FAM57B; ALDOA; PPP4C; TBX6; YPEL3; GDPD3; MAPK3; CORO1A; BOLA2; BOLA2B; SLX1A; SLX1B; SULT1A3; SULT1A4</i> | hsa-miR-3680-5p; hsa-miR-3680-3p |
| Case          | 57       | 16p11.2             | 16  | 29474810 | 30099408 | 624599    | Gain          | Yes          | <i>SPN; QPRT; C16orf54; ZG16; KIF22; MAZ; PRRT2; PAGR1; MVP; CDIPT; SEZ6L2; ASPHD1; KCTD13; TMEM219; TAOK2; HIRIP3; INO80E; DOC2A; C16orf92; FAM57B; ALDOA; PPP4C; TBX6; YPEL3; GDPD3; MAPK3</i>                                                        | hsa-miR-3680-5p; hsa-miR-3680-3p |
| Case          | 58       | 16p11.2             | 16  | 29474810 | 30134444 | 659635    | Gain          | Yes          | <i>SPN; QPRT; C16orf54; ZG16; KIF22; MAZ; PRRT2; PAGR1; MVP; CDIPT; SEZ6L2; ASPHD1; KCTD13; TMEM219; TAOK2; HIRIP3; INO80E; DOC2A; C16orf92; FAM57B; ALDOA; PPP4C; TBX6; YPEL3; GDPD3; MAPK3; CORO1A; BOLA2; BOLA2B; SLX1A; SLX1B; SULT1A3; SULT1A4</i> | hsa-miR-3680-5p; hsa-miR-3680-3p |
| Case          | 72       | 16p11.2             | 16  | 29992838 | 30306681 | 313844    | Loss          | Yes          | <i>PPP4C; TBX6; YPEL3; GDPD3; MAPK3; CORO1A; BOLA2; BOLA2B; SLX1A; SLX1B; SULT1A3; SULT1A4; CD2BP2; TBC1D10B; MYLPF; SEPT1</i>                                                                                                                          | -                                |
| Case          | 59       | 16p11.1,<br>16p11.2 | 16  | 34324072 | 35140727 | 816656    | Gain          | -            | -                                                                                                                                                                                                                                                       | -                                |
| Case          | 284      | 16q21               | 16  | 61434565 | 61501229 | 66665     | Loss          | Yes          | -                                                                                                                                                                                                                                                       | -                                |
| Case          | 113      | 16q21               | 16  | 61434565 | 61505546 | 70982     | Loss          | Yes          | -                                                                                                                                                                                                                                                       | -                                |
| Case          | 139      | 16q21               | 16  | 61434565 | 61501229 | 66665     | Loss          | Yes          | -                                                                                                                                                                                                                                                       | -                                |

| Sample Status | SampleID | Cytoband            | Chr | Start    | End      | Size (bp) | Gain/<br>Loss | Very<br>Rare | Protein-coding Genes in CNV                          | miRNAs in<br>CNV                               |
|---------------|----------|---------------------|-----|----------|----------|-----------|---------------|--------------|------------------------------------------------------|------------------------------------------------|
| Case          | 88       | 16q21               | 16  | 62111195 | 62214225 | 103031    | Loss          | Yes          | -                                                    | -                                              |
| Case          | 264      | 16q21               | 16  | 65156475 | 65168850 | 12376     | Gain          | Yes          | <i>CKLF; CMTM1; CKLF-CMTM1</i>                       | -                                              |
| Case          | 66       | 16q22.1             | 16  | 68926410 | 68956234 | 29825     | Gain          | Yes          | <i>DDX19A</i>                                        | -                                              |
| Case          | 2        | 16q22.2             | 16  | 69408394 | 69477595 | 69202     | Gain          |              | <i>HYDIN</i>                                         | -                                              |
| Case          | 2        | 16q22.2             | 16  | 69541283 | 69760298 | 219016    | Gain          | Yes          | <i>HYDIN</i>                                         | -                                              |
| Case          | 175      | 16q22.3             | 16  | 69848448 | 69917101 | 68654     | Loss          | Yes          | <i>FTSJD1</i>                                        | -                                              |
| Case          | 267      | 16q22.3             | 16  | 70966457 | 71319235 | 352779    | Loss          | Yes          | -                                                    | -                                              |
| Case          | 197      | 16q23.1             | 16  | 73426308 | 73558856 | 132549    | Loss          | Yes          | <i>WDR59</i>                                         | -                                              |
| Case          | 208      | 16q23.1             | 16  | 74513475 | 74557922 | 44448     | Loss          | Yes          | -                                                    | -                                              |
| Case          | 219      | 16q23.1             | 16  | 76128991 | 76547275 | 418285    | Gain          | Yes          | <i>NUDT7; VATIL</i>                                  | -                                              |
| Case          | 49       | 16q23.1             | 16  | 77818019 | 77832850 | 14832     | Gain          | Yes          | -                                                    | -                                              |
| Case          | 340      | 16q23.2             | 16  | 80150435 | 80164070 | 13636     | Loss          |              | -                                                    | -                                              |
| Case          | 259      | 16q24.1             | 16  | 82986056 | 83102109 | 116054    | Gain          | Yes          | <i>ATP2C2; TLDC1</i>                                 | -                                              |
| Case          | 184      | 16q24.1             | 16  | 83466461 | 83512239 | 45779     | Loss          | Yes          | <i>CRISPLD2</i>                                      | -                                              |
| Case          | 107      | 16q24.1             | 16  | 83737671 | 83754097 | 16427     | Loss          | Yes          | -                                                    | -                                              |
| Case          | 333      | 16q24.2             | 16  | 85838526 | 85862337 | 23812     | Loss          | Yes          | -                                                    | -                                              |
| Case          | 209      | 16q24.2             | 16  | 85843690 | 85900876 | 57187     | Loss          | Yes          | <i>C16orf95</i>                                      | -                                              |
| Case          | 111      | 16q24.3             | 16  | 88279461 | 88465741 | 186281    | Loss          | Yes          | <i>CDK10; SPATA2L; VPS9D1; ZNF276; FANCA; SPIRE2</i> | -                                              |
| Case          | 149      | 17p13.3             | 17  | 737820   | 758612   | 20793     | Loss          | Yes          | -                                                    | -                                              |
| Case          | 7        | 17p13.3             | 17  | 2024670  | 2044218  | 19549     | Loss          | Yes          | <i>SMG6</i>                                          | -                                              |
| Case          | 186      | 17p13.3             | 17  | 2344518  | 2713720  | 369203    | Gain          | Yes          | <i>METTL16; PAFAH1B1; CLUH; RAPIGAP2</i>             | hsa-miR-6776-5p; hsa-miR-6776-3p; hsa-miR-1253 |
| Case          | 213      | 17p13.2             | 17  | 6047210  | 6073536  | 26327     | Loss          |              | -                                                    | -                                              |
| Case          | 107      | 17p13.1,<br>17p13.2 | 17  | 6790374  | 6822833  | 32460     | Loss          | Yes          | -                                                    | -                                              |
| Case          | 160      | 17p13.1             | 17  | 8151077  | 8200707  | 49631     | Gain          | Yes          | <i>ARHGEF15; ODF4</i>                                | -                                              |
| Case          | 294      | 17p12               | 17  | 13120820 | 13175561 | 54742     | Gain          |              | -                                                    | -                                              |
| Case          | 103      | 17p11.2             | 17  | 18714996 | 18863470 | 148475    | Gain          | Yes          | <i>PRPSAP2; SLC5A10; FAM83G</i>                      | -                                              |
| Case          | 122      | 17p11.2             | 17  | 18729063 | 18858640 | 129578    | Gain          | Yes          | <i>PRPSAP2; SLC5A10; FAM83G</i>                      | -                                              |

| Sample Status | SampleID | Cytoband | Chr | Start    | End      | Size (bp) | Gain/<br>Loss | Very<br>Rare | Protein-coding Genes in CNV          | miRNAs in<br>CNV                                                                                                                  |
|---------------|----------|----------|-----|----------|----------|-----------|---------------|--------------|--------------------------------------|-----------------------------------------------------------------------------------------------------------------------------------|
| Case          | 122      | 17p11.2  | 17  | 19070824 | 19201813 | 130990    | Gain          |              | <i>EPN2; B9D1</i>                    | hsa-miR-1180-3p; hsa-miR-1180-5p                                                                                                  |
| Case          | 142      | 17q12    | 17  | 34829160 | 34867540 | 38381     | Gain          |              | <i>MED1</i>                          | -                                                                                                                                 |
| Case          | 113      | 17q23.1  | 17  | 55345451 | 55435265 | 89815     | Gain          | Yes          | <i>RPS6KB1; RNFT1</i>                | -                                                                                                                                 |
| Case          | 53       | 17q24.1  | 17  | 60349633 | 60428064 | 78432     | Gain          | Yes          | -                                    | -                                                                                                                                 |
| Case          | 248      | 17q24.2  | 17  | 61841258 | 61912613 | 71356     | Loss          |              | -                                    | -                                                                                                                                 |
| Case          | 61       | 17q24.2  | 17  | 61941341 | 62219289 | 277949    | Loss          | Yes          | <i>PRKCA</i>                         | hsa-miR-634                                                                                                                       |
|               |          |          |     |          |          |           |               |              |                                      | hsa-miR-657;<br>hsa-miR-3065-5p;<br>hsa-miR-3065-3p;<br>hsa-miR-338-5p;<br>hsa-miR-338-3p;<br>hsa-miR-1250-5p;<br>hsa-miR-1250-3p |
| Case          | 150      | 17q25.3  | 17  | 76591190 | 76746508 | 155319    | Gain          | Yes          | <i>BALAP2; AATK</i>                  | -                                                                                                                                 |
| Case          | 58       | 17q25.3  | 17  | 77141968 | 77243682 | 101715    | Gain          | Yes          | <i>NPLOC4; TSPAN10; PDE6G; OXLD1</i> | -                                                                                                                                 |
| Case          | 233      | 17q25.3  | 17  | 78435082 | 78454495 | 19414     | Gain          | Yes          | <i>TBCD</i>                          | -                                                                                                                                 |
| Case          | 140      | 17q25.3  | 17  | 78495700 | 78513885 | 18186     | Loss          | Yes          | <i>B3GNTL1</i>                       | -                                                                                                                                 |
| Case          | 56       | 18p11.32 | 18  | 1543     | 90949    | 89407     | Loss          | Yes          | -                                    | -                                                                                                                                 |
| Case          | 182      | 18p11.32 | 18  | 38133    | 68539    | 30407     | Loss          | Yes          | -                                    | -                                                                                                                                 |
| Case          | 135      | 18p11.31 | 18  | 5458670  | 5475196  | 16527     | Gain          | Yes          | <i>EPB41L3</i>                       | -                                                                                                                                 |
| Case          | 295      | 18p11.31 | 18  | 6477465  | 6510592  | 33128     | Loss          | Yes          | <i>LOC100130480</i>                  | -                                                                                                                                 |
| Case          | 174      | 18p11.31 | 18  | 6479608  | 6510592  | 30985     | Loss          | Yes          | <i>LOC100130480</i>                  | -                                                                                                                                 |
| Case          | 119      | 18p11.23 | 18  | 7899131  | 7954894  | 55764     | Loss          | Yes          | <i>PTPRM</i>                         | -                                                                                                                                 |
| Case          | 156      | 18p11.21 | 18  | 14958787 | 15318076 | 359290    | Gain          | Yes          | -                                    | -                                                                                                                                 |
| Case          | 129      | 18q11.2  | 18  | 22897038 | 22923293 | 26256     | Gain          | Yes          | -                                    | -                                                                                                                                 |
| Case          | 143      | 18q11.2  | 18  | 22897554 | 22923293 | 25740     | Gain          | Yes          | -                                    | -                                                                                                                                 |
| Case          | 246      | 18q12.1  | 18  | 23693824 | 23706904 | 13081     | Gain          | Yes          | -                                    | -                                                                                                                                 |
| Case          | 255      | 18q12.1  | 18  | 25362305 | 25391917 | 29613     | Gain          | Yes          | -                                    | -                                                                                                                                 |
| Case          | 72       | 18q12.1  | 18  | 26812963 | 26855042 | 42080     | Gain          | Yes          | <i>DSC3</i>                          | -                                                                                                                                 |
| Case          | 258      | 18q12.2  | 18  | 35194243 | 35321214 | 126972    | Gain          | Yes          | -                                    | -                                                                                                                                 |

| Sample Status | SampleID | Cytoband            | Chr | Start    | End      | Size (bp) | Gain/<br>Loss | Very<br>Rare | Protein-coding Genes in CNV                                                                            | miRNAs in<br>CNV                 |
|---------------|----------|---------------------|-----|----------|----------|-----------|---------------|--------------|--------------------------------------------------------------------------------------------------------|----------------------------------|
| Case          | 126      | 18q12.2,<br>18q12.3 | 18  | 35467011 | 35514435 | 47425     | Loss          | Yes          | -                                                                                                      | hsa-miR-5583-5p; hsa-miR-5583-3p |
| Case          | 132      | 18q12.3             | 18  | 37880681 | 37908226 | 27546     | Loss          | Yes          | <i>PIK3C3</i>                                                                                          | -                                |
| Case          | 20       | 18q12.3             | 18  | 38094336 | 38152496 | 58161     | Gain          | Yes          | -                                                                                                      | -                                |
| Case          | 107      | 18q21.1             | 18  | 42767511 | 42823656 | 56146     | Gain          | Yes          | <i>TCEB3CL2; TCEB3CL; TCEB3C; TCEB3B</i>                                                               | -                                |
| Case          | 194      | 18q21.2             | 18  | 47391508 | 47410166 | 18659     | Gain          | Yes          | -                                                                                                      | -                                |
| Case          | 280      | 18q21.2             | 18  | 49439197 | 49450886 | 11690     | Loss          |              | -                                                                                                      | -                                |
| Case          | 111      | 18q21.2             | 18  | 49887046 | 49912013 | 24968     | Gain          | Yes          | -                                                                                                      | -                                |
| Case          | 318      | 18q21.33            | 18  | 57449818 | 57465077 | 15260     | Gain          | Yes          | -                                                                                                      | -                                |
| Case          | 25       | 18q21.33            | 18  | 57449818 | 57465077 | 15260     | Gain          | Yes          | -                                                                                                      | -                                |
| Case          | 285      | 18q22.1             | 18  | 61276836 | 61330292 | 53457     | Loss          | Yes          | -                                                                                                      | -                                |
| Case          | 160      | 18q22.1             | 18  | 63759585 | 63934609 | 175025    | Loss          |              | -                                                                                                      | -                                |
| Case          | 151      | 18q22.1             | 18  | 64076387 | 64091877 | 15491     | Loss          | Yes          | -                                                                                                      | -                                |
| Case          | 89       | 18q22.2             | 18  | 65614643 | 65625466 | 10824     | Loss          | Yes          | -                                                                                                      | -                                |
| Case          | 90       | 18q22.2             | 18  | 65639534 | 65649742 | 10209     | Loss          | Yes          | -                                                                                                      | -                                |
| Case          | 283      | 18q22.2             | 18  | 66580807 | 66629311 | 48505     | Loss          | Yes          | -                                                                                                      | -                                |
| Case          | 253      | 18q22.3             | 18  | 66917040 | 66977396 | 60357     | Gain          | Yes          | -                                                                                                      | -                                |
| Case          | 238      | 18q22.3             | 18  | 68044449 | 68058704 | 14256     | Loss          | Yes          | -                                                                                                      | -                                |
| Case          | 182      | 18q22.3             | 18  | 69281483 | 69311825 | 30343     | Loss          | Yes          | -                                                                                                      | -                                |
| Case          | 341      | 18q22.3             | 18  | 69444668 | 69598084 | 153417    | Gain          | Yes          | -                                                                                                      | -                                |
| Case          | 316      | 18q23               | 18  | 72540040 | 72610755 | 70716     | Gain          | Yes          | -                                                                                                      | -                                |
| Case          | 115      | 18q23               | 18  | 73993496 | 74028815 | 35320     | Gain          | Yes          | -                                                                                                      | -                                |
| Case          | 155      | 18q23               | 18  | 75615004 | 75645643 | 30640     | Gain          | Yes          | -                                                                                                      | -                                |
| Case          | 155      | 18q23               | 18  | 75831795 | 76024184 | 192390    | Gain          | Yes          | <i>TXNL4A; RBFA; ADNP2; PARD6G</i>                                                                     | -                                |
|               |          |                     |     |          |          |           |               |              | <i>HMHA1; POLR2E; GPX4; SBNO2; STK11; C19orf26; ATP5D; MIDN; CIRBP; C19orf24; EFNA2; MUM1; NDUFS7;</i> |                                  |
| Case          | 72       | 19p13.3             | 19  | 1028701  | 1427815  | 399115    | Loss          | Yes          | <i>GAMT; DAZAP1; RPS15; APC2; C19orf25</i>                                                             | -                                |

| Sample Status | SampleID | Cytoband | Chr | Start    | End      | Size (bp) | Gain/<br>Loss | Very<br>Rare | Protein-coding Genes in CNV                                             | miRNAs in<br>CNV                                                   |
|---------------|----------|----------|-----|----------|----------|-----------|---------------|--------------|-------------------------------------------------------------------------|--------------------------------------------------------------------|
| Case          | 195      | 19p13.3  | 19  | 2015619  | 2195903  | 180285    | Loss          | Yes          | <i>MOB3A; IZUMO4; AP3D1; DOTIL;</i><br><i>PLEKHJ1; SF3A2</i>            | hsa-miR-1227-3p; hsa-miR-1227-5p; hsa-miR-6789-5p; hsa-miR-6789-3p |
| Case          | 145      | 19p13.2  | 19  | 6950420  | 7022394  | 71975     | Gain          | Yes          | <i>MBD3L5; MBD3L4; MBD3L2; MBD3L3</i>                                   | -                                                                  |
| Case          | 116      | 19p13.12 | 19  | 13984115 | 14008593 | 24479     | Gain          | Yes          | <i>RLN3; IL27RA</i>                                                     | -                                                                  |
| Case          | 254      | 19p13.12 | 19  | 14707300 | 14717363 | 10064     | Loss          | Yes          | <i>EMR2</i>                                                             | -                                                                  |
| Case          | 271      | 19p13.11 | 19  | 17754374 | 17822563 | 68190     | Gain          | Yes          | <i>FCHO1; B3GNT3; INSL3; JAK3</i>                                       | -                                                                  |
| Case          | 271      | 19p13.11 | 19  | 17909871 | 17965155 | 55285     | Gain          | Yes          | <i>CCDC124; KCNN1</i>                                                   | -                                                                  |
| Case          | 20       | 19p12    | 19  | 22926249 | 23090115 | 163867    | Loss          | Yes          | <i>ZNF728</i>                                                           | -                                                                  |
| Case          | 61       | 19q12    | 19  | 32648879 | 35564952 | 2916074   | Loss          | Yes          | <i>UQCERS1; VSTM2B; POP4; PLEKHF1;</i><br><i>C19orf12; CCNE1; URI1</i>  | -                                                                  |
| Case          | 187      | 19q13.2  | 19  | 46030675 | 46042833 | 12159     | Gain          | Yes          | <i>CYP2A6</i>                                                           | -                                                                  |
| Case          | 215      | 19q13.2  | 19  | 46749186 | 46864282 | 115097    | Gain          | Yes          | <i>CEACAM21; CEACAM4</i>                                                | -                                                                  |
| Case          | 50       | 19q13.31 | 19  | 48248681 | 48288811 | 40131     | Gain          | Yes          | <i>PSG2</i>                                                             | -                                                                  |
| Case          | 233      | 19q13.32 | 19  | 50317957 | 50331393 | 13437     | Gain          | Yes          | -                                                                       | -                                                                  |
| Case          | 364      | 19q13.33 | 19  | 56331792 | 56375631 | 43840     | Loss          |              | <i>SIGLEC7</i>                                                          | -                                                                  |
| Case          | 249      | 19q13.41 | 19  | 57976532 | 57991786 | 15255     | Gain          | Yes          | -                                                                       | -                                                                  |
| Case          | 366      | 19q13.42 | 19  | 59414087 | 59539399 | 125313    | Gain          |              | <i>LILRB3; LILRA6; LILRB5; LILRB2; LILRA3;</i><br><i>LILRA5; LILRA4</i> | hsa-miR-4752                                                       |
| Case          | 259      | 19q13.42 | 19  | 59423798 | 59539399 | 115602    | Gain          |              | <i>LILRA6; LILRB5; LILRB2; LILRA3; LILRA5;</i><br><i>LILRA4</i>         | hsa-miR-4752                                                       |
| Case          | 166      | 19q13.42 | 19  | 59721259 | 59844600 | 123342    | Loss          | Yes          | <i>LILRA2; LILRA1; LILRB1</i>                                           | -                                                                  |
| Case          | 76       | 19q13.42 | 19  | 61116344 | 61190605 | 74262     | Gain          |              | <i>NLRP13; NLRP8</i>                                                    | -                                                                  |
| Case          | 244      | 19q13.43 | 19  | 63209481 | 63252562 | 43082     | Loss          | Yes          | <i>ZSCAN1</i>                                                           | -                                                                  |
| Case          | 203      | 20p13    | 20  | 9548     | 57365    | 47818     | Gain          | Yes          | <i>DEFB125</i>                                                          | -                                                                  |
| Case          | 125      | 20p13    | 20  | 3966460  | 4025219  | 58760     | Loss          | Yes          | -                                                                       | -                                                                  |
| Case          | 182      | 20p12.3  | 20  | 7211956  | 7230051  | 18096     | Loss          | Yes          | -                                                                       | -                                                                  |
| Case          | 151      | 20p12.1  | 20  | 14183816 | 14197808 | 13993     | Gain          | Yes          | -                                                                       | -                                                                  |
| Case          | 62       | 20p12.1  | 20  | 14305685 | 15414625 | 1108941   | Loss          | Yes          | <i>MACROD2</i>                                                          | -                                                                  |
| Case          | 70       | 20p12.1  | 20  | 14425907 | 14488691 | 62785     | Loss          | Yes          | -                                                                       | -                                                                  |
| Case          | 269      | 20p12.1  | 20  | 14830862 | 14845614 | 14753     | Loss          | Yes          | -                                                                       | -                                                                  |



| Sample Status | SampleID | Cytoband              | Chr | Start    | End      | Size (bp) | Gain/<br>Loss | Very<br>Rare | Protein-coding Genes in CNV                   | miRNAs in<br>CNV                 |
|---------------|----------|-----------------------|-----|----------|----------|-----------|---------------|--------------|-----------------------------------------------|----------------------------------|
| Case          | 300      | 20p12.1               | 20  | 14855597 | 15145890 | 290294    | Loss          | -            |                                               | -                                |
| Case          | 16       | 20p12.1               | 20  | 14869065 | 14893839 | 24775     | Loss          | Yes          |                                               | -                                |
| Case          | 119      | 20p11.21              | 20  | 25613467 | 25686625 | 73159     | Gain          | Yes          | <i>ZNF337</i>                                 | -                                |
| Case          | 18       | 20q11.1               | 20  | 28119553 | 28141554 | 22002     | Loss          | Yes          |                                               | -                                |
| Case          | 6        | 20q11.21              | 20  | 31221629 | 31296441 | 74813     | Loss          |              | <i>BPIFA2; BPIFA3; BPIFA1</i>                 | -                                |
| Case          | 142      | 20q12                 | 20  | 39196466 | 39273206 | 76741     | Gain          | Yes          | <i>PLCG1; ZHX3</i>                            | hsa-miR-6871-5p; hsa-miR-6871-3p |
| Case          | 91       | 20q12                 | 20  | 40639325 | 40725926 | 86602     | Loss          | Yes          |                                               | -                                |
| Case          | 45       | 20q12                 | 20  | 40683821 | 40702831 | 19011     | Loss          |              |                                               | -                                |
| Case          | 92       | 20q12                 | 20  | 40778749 | 40966014 | 187266    | Gain          | Yes          | <i>PTPRT</i>                                  | -                                |
| Case          | 49       | 20q13.13              | 20  | 48145470 | 48430784 | 285315    | Loss          | Yes          | <i>TMEM189-UBE2V1; UBE2V1; TMEM189; CEBPB</i> | -                                |
| Case          | 223      | 20q13.2               | 20  | 49948917 | 49967658 | 18742     | Loss          |              |                                               | -                                |
| Case          | 244      | 20q13.2               | 20  | 53925050 | 53938003 | 12954     | Loss          | Yes          |                                               | -                                |
| Case          | 114      | 20q13.31              | 20  | 54839918 | 54863231 | 23314     | Loss          |              |                                               | -                                |
| Case          | 144      | 21q11.2               | 21  | 14829091 | 14855153 | 26063     | Gain          |              | <i>SAMSNI</i>                                 | -                                |
| Case          | 222      | 21q21.1               | 21  | 16685095 | 16703974 | 18880     | Gain          | Yes          |                                               | -                                |
| Case          | 184      | 21q21.1               | 21  | 18463079 | 18475103 | 12025     | Loss          | Yes          |                                               | -                                |
| Case          | 36       | 21q21.1               | 21  | 18463079 | 18475103 | 12025     | Loss          | Yes          |                                               | -                                |
| Case          | 144      | 21q21.1               | 21  | 20473109 | 20483508 | 10400     | Loss          | Yes          |                                               | -                                |
| Case          | 76       | 21q21.1               | 21  | 21731550 | 21745297 | 13748     | Loss          | Yes          |                                               | -                                |
| Case          | 44       | 21q21.1               | 21  | 22501126 | 22892332 | 391207    | Loss          | Yes          |                                               | -                                |
| Case          | 340      | 21q21.2               | 21  | 22943006 | 22997705 | 54700     | Loss          | Yes          |                                               | -                                |
| Case          | 20       | 21q21.2               | 21  | 24618999 | 24705724 | 86726     | Loss          | Yes          |                                               | -                                |
| Case          | 129      | 21q21.3               | 21  | 29373455 | 29406022 | 32568     | Loss          | Yes          | <i>MAP3K7CL</i>                               | -                                |
| Case          | 166      | 21q21.3               | 21  | 30082515 | 30094325 | 11811     | Loss          | Yes          |                                               | -                                |
| Case          | 223      | 21q22.11,<br>21q22.12 | 21  | 34644865 | 34827864 | 183000    | Gain          |              | <i>KCNE2; SMIM11; KCNE1; RCAN1</i>            | -                                |
| Case          | 274      | 21q22.11              | 21  | 34644865 | 34827864 | 183000    | Gain          |              | <i>KCNE1; RCAN1; KCNE2; SMIM11</i>            | -                                |
| Case          | 327      | 21q22.3               | 21  | 43477781 | 43488054 | 10274     | Loss          | Yes          |                                               | -                                |
| Case          | 133      | 21q22.3               | 21  | 46327739 | 46495061 | 167323    | Gain          | Yes          | <i>COL6A2; FTCD; SPATC1L; LSS; MCM3AP</i>     | -                                |
| Case          | 181      | 21q22.3               | 21  | 46843667 | 46860664 | 16998     | Loss          | Yes          | <i>SI00B</i>                                  | -                                |
| Case          | 2        | 22q11.1               | 22  | 14439734 | 14482524 | 42791     | Gain          |              |                                               | -                                |

| Sample Status | SampleID | Cytoband | Chr | Start    | End      | Size (bp) | Gain/<br>Loss | Very<br>Rare | Protein-coding Genes in CNV                      | miRNAs in<br>CNV |
|---------------|----------|----------|-----|----------|----------|-----------|---------------|--------------|--------------------------------------------------|------------------|
| Case          | 155      | 22q11.1  | 22  | 14439734 | 14482524 | 42791     | Gain          | -            |                                                  | -                |
| Case          | 312      | 22q11.1  | 22  | 15252849 | 15333727 | 80879     | Gain          | -            |                                                  | -                |
| Case          | 144      | 22q11.1  | 22  | 15268900 | 15380277 | 111378    | Gain          | -            |                                                  | -                |
| Case          | 231      | 22q11.1  | 22  | 15270159 | 15467705 | 197547    | Gain          | -            | <i>CCT8L2</i>                                    | -                |
| Case          | 208      | 22q11.21 | 22  | 18411601 | 18433554 | 21954     | Loss          | Yes          | <i>TANGO2</i>                                    | -                |
| Case          | 273      | 22q11.21 | 22  | 18411601 | 18437143 | 25543     | Loss          | Yes          | <i>TANGO2</i>                                    | -                |
| Case          | 213      | 22q11.21 | 22  | 18411964 | 18437143 | 25180     | Loss          | Yes          | <i>TANGO2</i>                                    | -                |
| Case          | 94       | 22q12.1  | 22  | 25285854 | 25344467 | 58614     | Gain          | Yes          | <i>CRYBB1</i>                                    | -                |
| Case          | 63       | 22q12.1  | 22  | 25367395 | 25440827 | 73433     | Loss          | Yes          | -                                                | -                |
| Case          | 63       | 22q12.1  | 22  | 25696811 | 27001242 | 1304432   | Loss          | Yes          | <i>MN1; PITPNB; TTC28</i>                        | hsa-miR-3199     |
| Case          | 377      | 22q12.2  | 22  | 28092170 | 28142673 | 50504     | Loss          | -            | <i>APIB1</i>                                     | -                |
| Case          | 270      | 22q13.33 | 22  | 49298465 | 49337390 | 38926     | Gain          | Yes          | <i>NCAPH2; SCO2; TYMP; ODF3B; KLHDC7B; SYCE3</i> | -                |
| Comparison    | OPGP316  | 1p36.32  | 1   | 2777567  | 3114015  | 336449    | Gain          | -            | <i>ACTRT2; PRDM16</i>                            | hsa-miR-4251     |
| Comparison    | OPGP227  | 1p36.32  | 1   | 3132655  | 3225901  | 93247     | Gain          | Yes          | <i>PRDM16</i>                                    | -                |
| Comparison    | OPGP146  | 1p36.32  | 1   | 3162562  | 3230995  | 68434     | Gain          | Yes          | -                                                | -                |
| Comparison    | OPGP316  | 1p36.32  | 1   | 3273162  | 3502376  | 229215    | Gain          | Yes          | <i>PRDM16; ARHGEF16; MEGF6</i>                   | hsa-miR-551a     |
| Comparison    | OPGP301  | 1p36.22  | 1   | 10918066 | 10975411 | 57346     | Loss          | Yes          | <i>C1orf127</i>                                  | -                |
| Comparison    | OPGP195  | 1p36.13  | 1   | 19592679 | 19608982 | 16304     | Loss          | Yes          | -                                                | -                |
| Comparison    | OPGP125  | 1p36.11  | 1   | 25180271 | 25595837 | 415567    | Gain          | -            | <i>SYF2; C1orf63; RHD; TMEM50A; RHCE</i>         | hsa-miR-4425     |
| Comparison    | OPGP91   | 1p36.11  | 1   | 26685662 | 26722882 | 37221     | Loss          | Yes          | -                                                | -                |
| Comparison    | OPGP235  | 1p35.1   | 1   | 33137332 | 33344564 | 207233    | Gain          | Yes          | <i>TMEM54; RNF19B; AK2; ADC</i>                  | -                |
| Comparison    | OPGP304  | 1p34.3   | 1   | 34864045 | 34877078 | 13034     | Loss          | -            | -                                                | -                |
| Comparison    | OPGP351  | 1p34.3   | 1   | 34864045 | 34877078 | 13034     | Loss          | -            | -                                                | -                |
| Comparison    | OPGP116  | 1p34.2   | 1   | 40738766 | 40753817 | 15052     | Loss          | Yes          | <i>EXO5</i>                                      | -                |
| Comparison    | OPGP314  | 1p34.1   | 1   | 46158906 | 46278997 | 120092    | Gain          | Yes          | <i>MAST2</i>                                     | -                |
| Comparison    | OPGP95   | 1p34.1   | 1   | 46243892 | 46306844 | 62953     | Gain          | Yes          | <i>MAST2; PIK3R3</i>                             | -                |
| Comparison    | OPGP225  | 1p33     | 1   | 48438616 | 48561408 | 122793    | Gain          | -            | <i>SLC5A9; SPATA6</i>                            | -                |
| Comparison    | OPGP8    | 1p33     | 1   | 50062688 | 50089082 | 26395     | Loss          | Yes          | -                                                | -                |
| Comparison    | OPGP222  | 1p32.3   | 1   | 55268332 | 55280544 | 12213     | Loss          | Yes          | <i>PCSK9</i>                                     | -                |
| Comparison    | OPGP336  | 1p32.2   | 1   | 58121593 | 58147861 | 26269     | Gain          | Yes          | -                                                | -                |
| Comparison    | OPGP285  | 1p31.1   | 1   | 71372770 | 71425908 | 53139     | Loss          | Yes          | -                                                | -                |
| Comparison    | OPGP243  | 1p31.1   | 1   | 72391356 | 72426021 | 34666     | Loss          | -            | -                                                | -                |

| Sample Status | SampleID | Cytoband       | Chr | Start     | End       | Size (bp) | Gain/<br>Loss | Very<br>Rare | Protein-coding Genes in CNV | miRNAs in<br>CNV |
|---------------|----------|----------------|-----|-----------|-----------|-----------|---------------|--------------|-----------------------------|------------------|
| Comparison    | OPGP287  | 1p31.1         | 1   | 72391356  | 72426021  | 34666     | Loss          | -            |                             | -                |
| Comparison    | OPGP302  | 1p31.1         | 1   | 72391356  | 72430802  | 39447     | Loss          | -            |                             | -                |
| Comparison    | OPGP86   | 1p31.1         | 1   | 76002427  | 76017962  | 15536     | Loss          | Yes          |                             | -                |
| Comparison    | OPGP132  | 1p31.1         | 1   | 76844658  | 76875040  | 30383     | Gain          | Yes          | <i>ST6GALNAC3</i>           | -                |
| Comparison    | OPGP355  | 1p22.3         | 1   | 86476458  | 86681286  | 204829    | Gain          | Yes          | <i>ODF2L; CLCA2</i>         | hsa-miR-7856-5p  |
| Comparison    | OPGP317  | 1p22.3         | 1   | 86686760  | 86766066  | 79307     | Gain          | Yes          | <i>CLCA2; CLCA1</i>         | -                |
| Comparison    | OPGP317  | 1p22.3         | 1   | 87079658  | 87247940  | 168283    | Gain          | Yes          | <i>SEP15; HS2ST1</i>        | -                |
| Comparison    | OPGP139  | 1p22.2         | 1   | 91962660  | 91991656  | 28997     | Gain          | Yes          | <i>TGFBR3</i>               | -                |
| Comparison    | OPGP201  | 1p22.1         | 1   | 92787354  | 92821078  | 33725     | Loss          | Yes          | <i>EVI5</i>                 | -                |
| Comparison    | OPGP66   | 1p21.1, 1p21.2 | 1   | 101816320 | 102613362 | 797043    | Gain          | Yes          | <i>OLFM3</i>                | -                |
| Comparison    | OPGP84   | 1p21.1         | 1   | 104746588 | 104830044 | 83457     | Loss          | -            |                             | -                |
| Comparison    | OPGP28   | 1p21.1         | 1   | 104901435 | 104966009 | 64575     | Loss          | Yes          | -                           | -                |
| Comparison    | OPGP278  | 1p13.3         | 1   | 107863323 | 107875050 | 11728     | Loss          | Yes          | -                           | -                |
| Comparison    | OPGP48   | 1p13.2         | 1   | 111645981 | 111686452 | 40472     | Loss          | Yes          | <i>CHIA</i>                 | -                |
| Comparison    | OPGP11   | 1p13.2         | 1   | 113105462 | 113378590 | 273129    | Gain          | Yes          | <i>SLC16A1</i>              | -                |
| Comparison    | OPGP326  | 1p13.2         | 1   | 113615510 | 113930997 | 315488    | Gain          | Yes          | <i>MAGI3</i>                | -                |
| Comparison    | OPGP311  | 1q21.1         | 1   | 145433143 | 145445807 | 12665     | Gain          | Yes          | -                           | -                |
| Comparison    | OPGP287  | 1q21.1         | 1   | 147509865 | 147521544 | 11680     | Gain          | -            |                             | -                |
| Comparison    | OPGP360  | 1q21.1         | 1   | 147509865 | 147521544 | 11680     | Gain          | -            |                             | -                |
| Comparison    | OPGP99   | 1q21.3         | 1   | 152087315 | 152103245 | 15931     | Loss          | Yes          | -                           | -                |
| Comparison    | OPGP18   | 1q23.1         | 1   | 156720980 | 156780407 | 59428     | Loss          | Yes          | -                           | -                |
| Comparison    | OPGP70   | 1q23.2         | 1   | 158189735 | 158199885 | 10151     | Loss          | -            | <i>SLAMF9</i>               | -                |
| Comparison    | OPGP296  | 1q23.2         | 1   | 158189735 | 158199885 | 10151     | Loss          | -            | <i>SLAMF9</i>               | -                |
| Comparison    | OPGP63   | 1q23.3         | 1   | 161823329 | 162062754 | 239426    | Loss          | -            |                             | -                |
| Comparison    | OPGP16   | 1q24.1         | 1   | 165460615 | 165471136 | 10522     | Gain          | Yes          | -                           | -                |
| Comparison    | OPGP368  | 1q24.2         | 1   | 168007475 | 168018527 | 11053     | Loss          | Yes          | -                           | -                |
| Comparison    | OPGP259  | 1q25.2         | 1   | 177590361 | 177652141 | 61781     | Gain          | -            | <i>AXDND1</i>               | -                |
| Comparison    | OPGP103  | 1q31.1         | 1   | 186906390 | 186964586 | 58197     | Loss          | Yes          | -                           | -                |
| Comparison    | OPGP189  | 1q31.1         | 1   | 187884325 | 187928475 | 44151     | Loss          | Yes          | -                           | -                |
| Comparison    | OPGP66   | 1q31.2         | 1   | 189259675 | 189313065 | 53391     | Loss          | Yes          | -                           | -                |
| Comparison    | OPGP285  | 1q31.2         | 1   | 189954806 | 190006828 | 52023     | Loss          | Yes          | -                           | -                |
| Comparison    | OPGP288  | 1q31.2         | 1   | 191140521 | 191161167 | 20647     | Loss          | -            |                             | -                |

| Sample Status | SampleID | Cytoband | Chr | Start     | End       | Size (bp) | Gain/<br>Loss | Very<br>Rare | Protein-coding Genes in CNV | miRNAs in<br>CNV |
|---------------|----------|----------|-----|-----------|-----------|-----------|---------------|--------------|-----------------------------|------------------|
| Comparison    | OPGP209  | 1q31.2   | 1   | 191141895 | 191158815 | 16921     | Loss          | -            | -                           | -                |
| Comparison    | OPGP91   | 1q31.3   | 1   | 194006743 | 194258287 | 251545    | Loss          | Yes          | -                           | -                |
| Comparison    | OPGP311  | 1q31.3   | 1   | 194981445 | 194997657 | 16213     | Loss          | -            | <i>CFH</i>                  | -                |
| Comparison    | OPGP87   | 1q32.1   | 1   | 203705537 | 203723303 | 17767     | Gain          | -            | -                           | -                |
| Comparison    | OPGP337  | 1q32.2   | 1   | 206849922 | 207054121 | 204200    | Gain          | Yes          | -                           | -                |
| Comparison    | OPGP214  | 1q32.3   | 1   | 210617154 | 210640252 | 23099     | Loss          | Yes          | <i>TMEM206</i>              | -                |
| Comparison    | OPGP289  | 1q41     | 1   | 212711886 | 212760921 | 49036     | Loss          | Yes          | -                           | -                |
| Comparison    | OPGP140  | 1q41     | 1   | 213519909 | 213596382 | 76474     | Loss          | Yes          | -                           | -                |
| Comparison    | OPGP197  | 1q41     | 1   | 216790158 | 217087235 | 297078    | Gain          | Yes          | -                           | -                |
| Comparison    | OPGP31   | 1q41     | 1   | 217909214 | 217922263 | 13050     | Loss          | -            | -                           | -                |
| Comparison    | OPGP78   | 1q41     | 1   | 221699976 | 221773616 | 73641     | Gain          | Yes          | -                           | -                |
| Comparison    | OPGP34   | 1q43     | 1   | 237168933 | 237189486 | 20554     | Loss          | Yes          | -                           | -                |
| Comparison    | OPGP40   | 1q43     | 1   | 241125282 | 241147170 | 21889     | Gain          | -            | -                           | -                |
| Comparison    | OPGP254  | 1q44     | 1   | 242020777 | 242070772 | 49996     | Gain          | Yes          | -                           | -                |
| Comparison    | OPGP364  | 1q44     | 1   | 243756388 | 244239828 | 483441    | Gain          | Yes          | <i>KIF26B; SMYD3</i>        | -                |
| Comparison    | OPGP323  | 1q44     | 1   | 246218668 | 246276668 | 58001     | Loss          | Yes          | <i>OR2L5; OR2L2</i>         | -                |
| Comparison    | OPGP243  | 1q44     | 1   | 246236516 | 246305216 | 68701     | Gain          | -            | <i>OR2L5; OR2L2; OR2L3</i>  | -                |
| Comparison    | OPGP68   | 2p25.3   | 2   | 3836936   | 3849326   | 12391     | Loss          | Yes          | -                           | -                |
| Comparison    | OPGP264  | 2p25.1   | 2   | 12003792  | 12026252  | 22461     | Loss          | Yes          | -                           | -                |
| Comparison    | OPGP161  | 2p25.1   | 2   | 12602820  | 12613687  | 10868     | Loss          | -            | -                           | -                |
| Comparison    | OPGP295  | 2p25.1   | 2   | 12602820  | 12617025  | 14206     | Loss          | -            | -                           | -                |
| Comparison    | OPGP296  | 2p25.1   | 2   | 12602820  | 12617025  | 14206     | Loss          | -            | -                           | -                |
| Comparison    | OPGP12   | 2p24.3   | 2   | 13958075  | 14652091  | 694017    | Loss          | Yes          | -                           | -                |
| Comparison    | OPGP218  | 2p24.1   | 2   | 22366001  | 22459477  | 93477     | Loss          | Yes          | -                           | -                |
| Comparison    | OPGP227  | 2p24.1   | 2   | 23379382  | 23412430  | 33049     | Loss          | Yes          | -                           | -                |
| Comparison    | OPGP250  | 2p23.3   | 2   | 27618812  | 27633022  | 14211     | Loss          | -            | -                           | -                |
| Comparison    | OPGP100  | 2p23.1   | 2   | 30668502  | 30706804  | 38303     | Loss          | -            | -                           | -                |
| Comparison    | OPGP67   | 2p23.1   | 2   | 31278104  | 31321880  | 43777     | Loss          | -            | <i>CAPN14; EHD3</i>         | -                |
| Comparison    | OPGP340  | 2p23.1   | 2   | 31278104  | 31321880  | 43777     | Loss          | -            | <i>CAPN14; EHD3</i>         | -                |
| Comparison    | OPGP311  | 2p22.3   | 2   | 32837941  | 32896033  | 58093     | Gain          | -            | <i>TTC27</i>                | -                |
| Comparison    | OPGP7    | 2p22.3   | 2   | 35198444  | 35265044  | 66601     | Loss          | Yes          | -                           | -                |
| Comparison    | OPGP336  | 2p22.3   | 2   | 35435011  | 35469179  | 34169     | Loss          | -            | -                           | -                |
| Comparison    | OPGP79   | 2p22.1   | 2   | 40069967  | 40309879  | 239913    | Gain          | Yes          | <i>SLC8A1</i>               | -                |

| Sample Status | SampleID | Cytoband      | Chr | Start     | End       | Size (bp) | Gain/<br>Loss | Very<br>Rare | Protein-coding Genes in CNV                               | miRNAs in<br>CNV |
|---------------|----------|---------------|-----|-----------|-----------|-----------|---------------|--------------|-----------------------------------------------------------|------------------|
| Comparison    | OPGP368  | 2p22.1        | 2   | 40269877  | 40286924  | 17048     | Loss          | -            |                                                           | -                |
| Comparison    | OPGP41   | 2p22.1        | 2   | 40998583  | 41084439  | 85857     | Loss          | Yes          |                                                           | -                |
| Comparison    | OPGP364  | 2p22.1        | 2   | 40998583  | 41084439  | 85857     | Loss          | Yes          |                                                           | -                |
| Comparison    | OPGP46   | 2p21          | 2   | 44596021  | 44621047  | 25027     | Loss          | Yes          |                                                           | -                |
| Comparison    | OPGP131  | 2p21          | 2   | 45165866  | 45185408  | 19543     | Gain          | -            |                                                           | -                |
| Comparison    | OPGP156  | 2p21          | 2   | 45165866  | 45185408  | 19543     | Gain          | -            |                                                           | -                |
| Comparison    | OPGP314  | 2p21          | 2   | 45165866  | 45181807  | 15942     | Gain          | -            |                                                           | -                |
| Comparison    | OPGP162  | 2p21          | 2   | 45334332  | 45381926  | 47595     | Loss          | Yes          |                                                           | -                |
| Comparison    | OPGP203  | 2p16.3        | 2   | 51190991  | 51211206  | 20216     | Loss          | Yes          |                                                           | -                |
| Comparison    | OPGP26   | 2p16.3,2p16.2 | 2   | 52682617  | 52747003  | 64387     | Loss          | -            |                                                           | -                |
| Comparison    | OPGP8    | 2p16.2        | 2   | 53383061  | 53406900  | 23840     | Loss          | -            |                                                           | -                |
| Comparison    | OPGP81   | 2p16.2        | 2   | 53537059  | 53562047  | 24989     | Loss          | Yes          |                                                           | -                |
| Comparison    | OPGP99   | 2p16.1        | 2   | 55893434  | 55981843  | 88410     | Loss          | Yes          | <i>EFEMP1</i>                                             | -                |
| Comparison    | OPGP168  | 2p16.1        | 2   | 57446156  | 57535320  | 89165     | Gain          | Yes          |                                                           | -                |
| Comparison    | OPGP123  | 2p16.1        | 2   | 59157327  | 59178260  | 20934     | Gain          | Yes          |                                                           | -                |
| Comparison    | OPGP318  | 2p15          | 2   | 61800352  | 61816406  | 16055     | Loss          | -            |                                                           | -                |
| Comparison    | OPGP226  | 2p13.2        | 2   | 73729307  | 73787035  | 57729     | Gain          | -            | <i>NAT8B</i>                                              | -                |
| Comparison    | OPGP68   | 2p12          | 2   | 77084854  | 77108672  | 23819     | Gain          | Yes          |                                                           | -                |
| Comparison    | OPGP13   | 2p12          | 2   | 78599709  | 78663818  | 64110     | Loss          | Yes          |                                                           | -                |
| Comparison    | OPGP212  | 2p12          | 2   | 80217697  | 80268753  | 51057     | Loss          | Yes          |                                                           | -                |
| Comparison    | OPGP165  | 2p12          | 2   | 82866310  | 83147178  | 280869    | Loss          | Yes          |                                                           | -                |
| Comparison    | OPGP225  | 2p11.2        | 2   | 87015364  | 87230132  | 214769    | Gain          | -            | <i>RGPD1; RGPD2; PLGLB1; PLGLB2</i>                       | -                |
| Comparison    | OPGP5    | 2p11.2        | 2   | 88907418  | 88992571  | 85154     | Gain          | Yes          |                                                           | -                |
| Comparison    | OPGP303  | 2p11.2        | 2   | 88907418  | 88992571  | 85154     | Gain          | Yes          |                                                           | -                |
| Comparison    | OPGP65   | 2q11.2        | 2   | 97833460  | 98182442  | 348983    | Gain          | -            | <i>TMEM131; VWA3B</i>                                     | -                |
| Comparison    | OPGP117  | 2q12.3        | 2   | 107763445 | 107781596 | 18152     | Loss          | Yes          |                                                           | -                |
| Comparison    | OPGP244  | 2q13          | 2   | 109618962 | 110061321 | 442360    | Gain          | -            | <i>SEPT10; SOWAHC; RGPD5; RGPD6; RGPD8; LIMS3; LIMS3L</i> | -                |
| Comparison    | OPGP166  | 2q14.3        | 2   | 129180187 | 129229752 | 49566     | Gain          | Yes          |                                                           | -                |
| Comparison    | OPGP233  | 2q21.1        | 2   | 131194418 | 131222786 | 28369     | Gain          | Yes          | <i>GPR148</i>                                             | -                |
| Comparison    | OPGP186  | 2q22.1        | 2   | 136737724 | 136759546 | 21823     | Loss          | Yes          |                                                           | -                |
| Comparison    | OPGP106  | 2q22.1        | 2   | 137392303 | 137434487 | 42185     | Loss          | Yes          |                                                           | -                |
| Comparison    | OPGP30   | 2q22.1        | 2   | 137640231 | 137939320 | 299090    | Loss          | Yes          | <i>THSD7B</i>                                             | -                |

| Sample Status | SampleID | Cytoband      | Chr | Start     | End       | Size (bp) | Gain/<br>Loss | Very<br>Rare | Protein-coding Genes in CNV                     | miRNAs in<br>CNV |
|---------------|----------|---------------|-----|-----------|-----------|-----------|---------------|--------------|-------------------------------------------------|------------------|
| Comparison    | OPGP353  | 2q22.2        | 2   | 143884436 | 143918742 | 34307     | Gain          |              | <i>ARHGAP15</i>                                 | -                |
| Comparison    | OPGP367  | 2q23.1        | 2   | 148728411 | 148781340 | 52930     | Loss          | Yes          | -                                               | -                |
| Comparison    | OPGP257  | 2q31.1        | 2   | 175315568 | 175338721 | 23154     | Loss          | Yes          | <i>CHRNA1</i>                                   | -                |
| Comparison    | OPGP132  | 2q31.2        | 2   | 179561710 | 179605627 | 43918     | Loss          | Yes          | -                                               | -                |
| Comparison    | OPGP306  | 2q32.1        | 2   | 183223185 | 183279605 | 56421     | Loss          | Yes          | -                                               | -                |
| Comparison    | OPGP284  | 2q32.1        | 2   | 186661171 | 186815412 | 154242    | Loss          |              | -                                               | -                |
| Comparison    | OPGP114  | 2q33.1        | 2   | 197249313 | 197663025 | 413713    | Gain          | Yes          | <i>CCDC150; GTF3C3; C2orf66; PGAP1; ANKRD44</i> | -                |
| Comparison    | OPGP53   | 2q33.1        | 2   | 199419959 | 199545890 | 125932    | Gain          | Yes          | -                                               | -                |
| Comparison    | OPGP174  | 2q33.3,2q33.2 | 2   | 205563673 | 205663716 | 100044    | Loss          | Yes          | <i>PARD3B</i>                                   | -                |
| Comparison    | OPGP142  | 2q34          | 2   | 209797472 | 209824594 | 27123     | Gain          |              | -                                               | -                |
| Comparison    | OPGP166  | 2q34          | 2   | 212798254 | 212889567 | 91314     | Loss          | Yes          | -                                               | -                |
| Comparison    | OPGP337  | 2q34          | 2   | 214308244 | 214325958 | 17715     | Loss          | Yes          | -                                               | -                |
| Comparison    | OPGP205  | 2q34          | 2   | 214807471 | 214825189 | 17719     | Gain          |              | -                                               | -                |
| Comparison    | OPGP123  | 2q34          | 2   | 214816268 | 214830633 | 14366     | Gain          |              | -                                               | -                |
| Comparison    | OPGP101  | 2q35          | 2   | 220443022 | 220464396 | 21375     | Gain          |              | -                                               | -                |
| Comparison    | OPGP4    | 2q37.1        | 2   | 230884307 | 230966859 | 82553     | Gain          |              | <i>SPI40; SPI40L</i>                            | -                |
| Comparison    | OPGP1    | 2q37.1        | 2   | 231122629 | 231137464 | 14836     | Gain          | Yes          | -                                               | -                |
| Comparison    | OPGP136  | 2q37.2        | 2   | 235871664 | 236172371 | 300708    | Gain          | Yes          | <i>AGAP1</i>                                    | -                |
| Comparison    | OPGP53   | 2q37.2        | 2   | 236167740 | 236196122 | 28383     | Loss          |              | -                                               | -                |
| Comparison    | OPGP136  | 2q37.3,2q37.2 | 2   | 236798401 | 237062102 | 263702    | Gain          | Yes          | <i>ASB18; IQCA1</i>                             | -                |
| Comparison    | OPGP88   | 2q37.3        | 2   | 237295053 | 237338319 | 43267     | Loss          | Yes          | -                                               | -                |
| Comparison    | OPGP134  | 3p26.3        | 3   | 1714339   | 1768951   | 54613     | Loss          | Yes          | -                                               | -                |
| Comparison    | OPGP148  | 3p26.3        | 3   | 1779655   | 1805430   | 25776     | Loss          | Yes          | -                                               | -                |
| Comparison    | OPGP200  | 3p26.3        | 3   | 1849179   | 1870850   | 21672     | Loss          |              | -                                               | -                |
| Comparison    | OPGP180  | 3p26.3        | 3   | 1904322   | 1927460   | 23139     | Loss          | Yes          | -                                               | -                |
| Comparison    | OPGP72   | 3p26.2        | 3   | 4156405   | 4212036   | 55632     | Loss          |              | -                                               | -                |
| Comparison    | OPGP107  | 3p26.2        | 3   | 5364179   | 5411289   | 47111     | Loss          | Yes          | -                                               | -                |
| Comparison    | OPGP151  | 3p26.2        | 3   | 5364179   | 5411289   | 47111     | Loss          | Yes          | -                                               | -                |
| Comparison    | OPGP308  | 3p26.1        | 3   | 5582285   | 5607263   | 24979     | Loss          | Yes          | -                                               | -                |
| Comparison    | OPGP85   | 3p26.1        | 3   | 6546105   | 6573353   | 27249     | Loss          | Yes          | -                                               | -                |
| Comparison    | OPGP146  | 3p25.3        | 3   | 10412280  | 10432394  | 20115     | Gain          |              | <i>ATP2B2</i>                                   | -                |
| Comparison    | OPGP19   | 3p25.1        | 3   | 12543425  | 12648371  | 104947    | Gain          | Yes          | <i>TSEN2; C3orf83; MKRN2; RAF1</i>              | -                |

| Sample Status | SampleID | Cytoband            | Chr | Start     | End       | Size (bp) | Gain/<br>Loss | Very<br>Rare | Protein-coding Genes in CNV               | miRNAs in<br>CNV |
|---------------|----------|---------------------|-----|-----------|-----------|-----------|---------------|--------------|-------------------------------------------|------------------|
| Comparison    | OPGP70   | 3p24.3              | 3   | 15964963  | 15989921  | 24959     | Loss          | Yes          | -                                         | -                |
| Comparison    | OPGP225  | 3p24.3              | 3   | 17894426  | 17923351  | 28926     | Loss          | -            | -                                         | -                |
| Comparison    | OPGP24   | 3p24.3              | 3   | 22212602  | 22280792  | 68191     | Gain          | Yes          | -                                         | -                |
| Comparison    | OPGP240  | 3p24.3,3p24.2       | 3   | 23658782  | 23819436  | 160655    | Gain          | Yes          | -                                         | -                |
| Comparison    | OPGP199  | 3p24.2,3p24.1       | 3   | 26352082  | 26423930  | 71849     | Loss          | Yes          | -                                         | -                |
| Comparison    | OPGP345  | 3p22.3              | 3   | 34701725  | 34781687  | 79963     | Loss          | Yes          | -                                         | -                |
| Comparison    | OPGP208  | 3p22.3              | 3   | 34884209  | 34916077  | 31869     | Loss          | Yes          | -                                         | -                |
| Comparison    | OPGP53   | 3p22.1              | 3   | 41068579  | 41120029  | 51451     | Loss          | -            | -                                         | -                |
| Comparison    | OPGP268  | 3p22.1              | 3   | 41332836  | 41799436  | 466601    | Loss          | -            | <i>ULK4</i>                               | -                |
| Comparison    | OPGP192  | 3p22.1              | 3   | 41776668  | 41866580  | 89913     | Loss          | Yes          | <i>ULK4</i>                               | -                |
| Comparison    | OPGP86   | 3p21.31             | 3   | 47902746  | 48007417  | 104672    | Gain          | -            | <i>MAP4</i>                               | -                |
| Comparison    | OPGP334  | 3p21.1              | 3   | 53722720  | 53895962  | 173243    | Gain          | Yes          | <i>CACNAID; CHDH; IL17RB; ACTR8; SELK</i> | -                |
| Comparison    | OPGP265  | 3p14.2              | 3   | 59829199  | 61005753  | 1176555   | Loss          | Yes          | <i>FHIT</i>                               | -                |
| Comparison    | OPGP184  | 3p14.2              | 3   | 61633955  | 61693625  | 59671     | Loss          | -            | -                                         | -                |
| Comparison    | OPGP229  | 3p14.2              | 3   | 61633955  | 61693625  | 59671     | Loss          | -            | -                                         | -                |
| Comparison    | OPGP4    | 3p14.1              | 3   | 65647659  | 65693144  | 45486     | Loss          | Yes          | -                                         | -                |
| Comparison    | OPGP216  | 3p11.2              | 3   | 88024990  | 88066652  | 41663     | Gain          | -            | -                                         | -                |
| Comparison    | OPGP132  | 3q13.11             | 3   | 105512260 | 105564637 | 52378     | Loss          | Yes          | -                                         | -                |
| Comparison    | OPGP328  | 3q13.12             | 3   | 107896596 | 107950455 | 53860     | Gain          | Yes          | -                                         | -                |
| Comparison    | OPGP346  | 3q13.12,<br>3q13.13 | 3   | 109497937 | 109760767 | 262831    | Gain          | Yes          | <i>HHLA2; MYH15; KIAA1524</i>             | -                |
| Comparison    | OPGP131  | 3q13.13             | 3   | 109908932 | 110134824 | 225893    | Loss          | Yes          | <i>RETNLB; TRATI; GUCA1C</i>              | -                |
| Comparison    | OPGP350  | 3q21.1              | 3   | 123880407 | 124235121 | 354715    | Gain          | Yes          | <i>PARP14; HSPBAP1; DIRC2; SEMA5B</i>     | -                |
| Comparison    | OPGP151  | 3q24                | 3   | 144956132 | 145145097 | 188966    | Loss          | Yes          | <i>SLC9A9</i>                             | -                |
| Comparison    | OPGP91   | 3q24                | 3   | 145665527 | 145678368 | 12842     | Loss          | Yes          | -                                         | -                |
| Comparison    | OPGP147  | 3q24                | 3   | 147125201 | 147144641 | 19441     | Loss          | Yes          | -                                         | -                |
| Comparison    | OPGP4    | 3q25.2              | 3   | 154870103 | 155031925 | 161823    | Gain          | Yes          | -                                         | -                |
| Comparison    | OPGP147  | 3q26.1              | 3   | 163520556 | 163606060 | 85505     | Loss          | Yes          | -                                         | -                |
| Comparison    | OPGP64   | 3q26.1              | 3   | 166179336 | 166273847 | 94512     | Gain          | Yes          | <i>SI</i>                                 | -                |
| Comparison    | OPGP66   | 3q26.1              | 3   | 168005537 | 168032644 | 27108     | Gain          | -            | -                                         | -                |
| Comparison    | OPGP78   | 3q26.31             | 3   | 175583102 | 175596822 | 13721     | Loss          | -            | -                                         | -                |

| Sample Status | SampleID | Cytoband | Chr | Start     | End       | Size (bp) | Gain/<br>Loss | Very<br>Rare | Protein-coding Genes in CNV                                                                                                                                                                                            | miRNAs in<br>CNV                 |
|---------------|----------|----------|-----|-----------|-----------|-----------|---------------|--------------|------------------------------------------------------------------------------------------------------------------------------------------------------------------------------------------------------------------------|----------------------------------|
| Comparison    | OPGP345  | 3q26.31  | 3   | 176569482 | 177229640 | 660159    | Loss          | Yes          | <i>NAALADL2</i>                                                                                                                                                                                                        | hsa-miR-4789-5p; hsa-miR-4789-3p |
| Comparison    | OPGP29   | 3q26.32  | 3   | 180365866 | 180412251 | 46386     | Gain          |              | <i>PIK3CA</i>                                                                                                                                                                                                          | -                                |
| Comparison    | OPGP360  | 3q26.33  | 3   | 183836513 | 183862220 | 25708     | Loss          | Yes          | -                                                                                                                                                                                                                      | -                                |
| Comparison    | OPGP166  | 3q27.3   | 3   | 187868833 | 187900465 | 31633     | Loss          |              | <i>HRG</i>                                                                                                                                                                                                             | -                                |
| Comparison    | OPGP275  | 3q27.3   | 3   | 187869119 | 187904832 | 35714     | Loss          |              | <i>HRG</i>                                                                                                                                                                                                             | -                                |
| Comparison    | OPGP228  | 3q27.3   | 3   | 187869253 | 187904832 | 35580     | Loss          |              | <i>HRG</i>                                                                                                                                                                                                             | -                                |
| Comparison    | OPGP324  | 3q28     | 3   | 191159675 | 191482446 | 322772    | Loss          | Yes          | <i>LEPREL1</i>                                                                                                                                                                                                         | -                                |
| Comparison    | OPGP175  | 3q28     | 3   | 193459773 | 193499362 | 39590     | Loss          | Yes          | -                                                                                                                                                                                                                      | -                                |
| Comparison    | OPGP319  | 3q29     | 3   | 195719679 | 195750493 | 30815     | Gain          | Yes          | -                                                                                                                                                                                                                      | -                                |
| Comparison    | OPGP275  | 3q29     | 3   | 199157125 | 199170719 | 13595     | Gain          | Yes          | <i>RPL35A</i>                                                                                                                                                                                                          | -                                |
| Comparison    | OPGP310  | 4p16.3   | 4   | 1042239   | 1107925   | 65687     | Gain          | Yes          | <i>RNF212</i>                                                                                                                                                                                                          | -                                |
| Comparison    | OPGP50   | 4p16.3   | 4   | 2355110   | 2366882   | 11773     | Gain          | Yes          | -                                                                                                                                                                                                                      | -                                |
| Comparison    | OPGP246  | 4p16.3   | 4   | 2933890   | 2980407   | 46518     | Gain          | Yes          | <i>NOPI4; GRK4</i>                                                                                                                                                                                                     | -                                |
| Comparison    | OPGP216  | 4p16.1   | 4   | 8771068   | 9095185   | 324118    | Loss          |              | <i>USP17L10; USP17L11; USP17L12; USP17L13; USP17L17; USP17L18; USP17L19; USP17L20; USP17L21; USP17L22; USP17L24; USP17L25; USP17L26; USP17L27; USP17L28; USP17L29; USP17L30; USP17L5; USP17L15; DEFB131; LOC650293</i> | -                                |
| Comparison    | OPGP35   | 4p16.1   | 4   | 9853711   | 9890922   | 37212     | Loss          | Yes          | -                                                                                                                                                                                                                      | -                                |
| Comparison    | OPGP157  | 4p15.33  | 4   | 11520578  | 11535961  | 15384     | Gain          |              | -                                                                                                                                                                                                                      | -                                |
| Comparison    | OPGP26   | 4p15.32  | 4   | 15385279  | 15445335  | 60057     | Gain          |              | <i>CD38</i>                                                                                                                                                                                                            | -                                |
| Comparison    | OPGP251  | 4p15.31  | 4   | 19220177  | 19264426  | 44250     | Loss          | Yes          | -                                                                                                                                                                                                                      | -                                |
| Comparison    | OPGP161  | 4p15.31  | 4   | 21152913  | 21175276  | 22364     | Loss          | Yes          | -                                                                                                                                                                                                                      | -                                |
| Comparison    | OPGP89   | 4p15.1   | 4   | 28348262  | 28474772  | 126511    | Loss          | Yes          | -                                                                                                                                                                                                                      | hsa-miR-4275                     |
| Comparison    | OPGP348  | 4p14     | 4   | 39602122  | 39791634  | 189513    | Gain          | Yes          | <i>PDS5A; N4BP2</i>                                                                                                                                                                                                    | -                                |
| Comparison    | OPGP264  | 4p14     | 4   | 39692394  | 39737695  | 45302     | Gain          | Yes          | -                                                                                                                                                                                                                      | -                                |
| Comparison    | OPGP252  | 4p13     | 4   | 43325028  | 43371077  | 46050     | Loss          | Yes          | -                                                                                                                                                                                                                      | -                                |
| Comparison    | OPGP176  | 4q12     | 4   | 56819933  | 56837598  | 17666     | Gain          | Yes          | -                                                                                                                                                                                                                      | -                                |
| Comparison    | OPGP85   | 4q12     | 4   | 57833449  | 58261378  | 427930    | Gain          |              | -                                                                                                                                                                                                                      | -                                |
| Comparison    | OPGP161  | 4q13.1   | 4   | 61782145  | 61793725  | 11581     | Loss          |              | -                                                                                                                                                                                                                      | -                                |



| Sample Status | SampleID | Cytoband | Chr | Start     | End       | Size (bp) | Gain/<br>Loss | Very<br>Rare | Protein-coding Genes in CNV | miRNAs in<br>CNV |
|---------------|----------|----------|-----|-----------|-----------|-----------|---------------|--------------|-----------------------------|------------------|
| Comparison    | OPGP269  | 4q13.1   | 4   | 62227896  | 62267377  | 39482     | Loss          | Yes          | -                           | -                |
| Comparison    | OPGP80   | 4q13.2   | 4   | 68532905  | 68560171  | 27267     | Loss          |              | -                           | -                |
| Comparison    | OPGP266  | 4q13.2   | 4   | 69705096  | 69751804  | 46709     | Loss          |              | <i>UGT2B10</i>              | -                |
| Comparison    | OPGP22   | 4q13.3   | 4   | 73100660  | 73122182  | 21523     | Loss          | Yes          | <i>NPFFR2</i>               | -                |
| Comparison    | OPGP1    | 4q21.21  | 4   | 79908025  | 79924975  | 16951     | Gain          | Yes          | <i>BMP2K</i>                | -                |
| Comparison    | OPGP166  | 4q21.22  | 4   | 82700206  | 82738912  | 38707     | Loss          | Yes          | -                           | -                |
| Comparison    | OPGP70   | 4q22.1   | 4   | 91887762  | 91959857  | 72096     | Gain          | Yes          | <i>CCSER1</i>               | -                |
| Comparison    | OPGP129  | 4q22.1   | 4   | 92407654  | 92476614  | 68961     | Gain          |              | -                           | -                |
| Comparison    | OPGP214  | 4q22.1   | 4   | 93106668  | 93402805  | 296138    | Loss          |              | -                           | -                |
| Comparison    | OPGP366  | 4q22.1   | 4   | 93692083  | 93709753  | 17671     | Loss          | Yes          | -                           | -                |
| Comparison    | OPGP331  | 4q22.2   | 4   | 95258776  | 95282631  | 23856     | Gain          | Yes          | -                           | -                |
| Comparison    | OPGP219  | 4q23     | 4   | 102038141 | 102103608 | 65468     | Loss          | Yes          | -                           | -                |
| Comparison    | OPGP227  | 4q24     | 4   | 102944497 | 102981734 | 37238     | Gain          | Yes          | <i>BANK1</i>                | -                |
| Comparison    | OPGP336  | 4q24     | 4   | 103825185 | 103864128 | 38944     | Gain          | Yes          | <i>MANBA</i>                | -                |
| Comparison    | OPGP49   | 4q24     | 4   | 104111158 | 104147496 | 36339     | Loss          | Yes          | <i>SLC9B1</i>               | -                |
| Comparison    | OPGP268  | 4q24     | 4   | 107498899 | 107618439 | 119541    | Gain          |              | <i>GIMDI</i>                | -                |
| Comparison    | OPGP219  | 4q25     | 4   | 112516864 | 112529063 | 12200     | Loss          | Yes          | -                           | -                |
| Comparison    | OPGP298  | 4q25     | 4   | 113267887 | 113324725 | 56839     | Gain          | Yes          | <i>C4orf32</i>              | -                |
| Comparison    | OPGP67   | 4q26     | 4   | 116420120 | 116437050 | 16931     | Loss          | Yes          | -                           | -                |
| Comparison    | OPGP131  | 4q26     | 4   | 116422771 | 116438169 | 15399     | Loss          | Yes          | -                           | -                |
| Comparison    | OPGP338  | 4q26     | 4   | 117070336 | 117987237 | 916902    | Gain          | Yes          | -                           | hsa-miR-1973     |
| Comparison    | OPGP47   | 4q26     | 4   | 117630141 | 117726424 | 96284     | Gain          | Yes          | -                           | -                |
| Comparison    | OPGP204  | 4q28.1   | 4   | 127458501 | 127673045 | 214545    | Loss          | Yes          | -                           | -                |
| Comparison    | OPGP216  | 4q28.2   | 4   | 129993331 | 130142984 | 149654    | Gain          |              | <i>PHF17; SCLT1</i>         | -                |
| Comparison    | OPGP270  | 4q28.2   | 4   | 131182407 | 131224159 | 41753     | Loss          | Yes          | -                           | -                |
| Comparison    | OPGP84   | 4q28.3   | 4   | 135557772 | 135614100 | 56329     | Gain          |              | -                           | -                |
| Comparison    | OPGP95   | 4q28.3   | 4   | 135636764 | 135746833 | 110070    | Loss          | Yes          | -                           | -                |
| Comparison    | OPGP338  | 4q28.3   | 4   | 136594287 | 138635305 | 2041019   | Loss          | Yes          | -                           | -                |
| Comparison    | OPGP294  | 4q28.3   | 4   | 138083646 | 138098754 | 15109     | Loss          | Yes          | -                           | -                |
| Comparison    | OPGP283  | 4q31.1   | 4   | 139893157 | 139927943 | 34787     | Loss          | Yes          | -                           | -                |
| Comparison    | OPGP154  | 4q31.21  | 4   | 143025931 | 143050531 | 24601     | Gain          | Yes          | -                           | -                |
| Comparison    | OPGP349  | 4q31.23  | 4   | 148961558 | 149040682 | 79125     | Loss          | Yes          | <i>ARHGAP10</i>             | -                |
| Comparison    | OPGP277  | 4q32.1   | 4   | 155304052 | 155331427 | 27376     | Loss          | Yes          | -                           | -                |

| Sample Status | SampleID | Cytoband | Chr | Start     | End       | Size (bp) | Gain/<br>Loss | Very<br>Rare | Protein-coding Genes in CNV                                                                               | miRNAs in<br>CNV |
|---------------|----------|----------|-----|-----------|-----------|-----------|---------------|--------------|-----------------------------------------------------------------------------------------------------------|------------------|
| Comparison    | OPGP74   | 4q32.1   | 4   | 157098371 | 157119459 | 21089     | Loss          | Yes          | -                                                                                                         | -                |
| Comparison    | OPGP118  | 4q32.1   | 4   | 160707810 | 160718617 | 10808     | Loss          | Yes          | -                                                                                                         | -                |
| Comparison    | OPGP283  | 4q32.2   | 4   | 161769134 | 161895127 | 125994    | Loss          | Yes          | -                                                                                                         | -                |
| Comparison    | OPGP335  | 4q32.2   | 4   | 162022141 | 162050907 | 28767     | Loss          | Yes          | -                                                                                                         | -                |
| Comparison    | OPGP43   | 4q32.2   | 4   | 163381909 | 163402576 | 20668     | Loss          | Yes          | -                                                                                                         | -                |
| Comparison    | OPGP150  | 4q32.3   | 4   | 166213561 | 166244840 | 31280     | Loss          | Yes          | <i>TMEM192</i>                                                                                            | -                |
| Comparison    | OPGP347  | 4q32.3   | 4   | 167741303 | 167828197 | 86895     | Gain          | Yes          | -                                                                                                         | -                |
| Comparison    | OPGP214  | 4q34.1   | 4   | 173073090 | 173099352 | 26263     | Loss          | -            | -                                                                                                         | -                |
| Comparison    | OPGP235  | 4q34.3   | 4   | 179672854 | 179697140 | 24287     | Loss          | Yes          | -                                                                                                         | -                |
| Comparison    | OPGP343  | 4q34.3   | 4   | 182157291 | 182182771 | 25481     | Loss          | Yes          | -                                                                                                         | -                |
| Comparison    | OPGP4    | 4q35.1   | 4   | 182728030 | 182790037 | 62008     | Loss          | Yes          | -                                                                                                         | -                |
| Comparison    | OPGP215  | 4q35.1   | 4   | 185971583 | 185996924 | 25342     | Loss          | Yes          | -                                                                                                         | -                |
| Comparison    | OPGP283  | 4q35.2   | 4   | 188089824 | 188686081 | 596258    | Loss          | Yes          | -                                                                                                         | -                |
| Comparison    | OPGP306  | 4q35.2   | 4   | 188531974 | 188763652 | 231679    | Gain          | Yes          | -                                                                                                         | -                |
| Comparison    | OPGP306  | 4q35.2   | 4   | 189413170 | 189712337 | 299168    | Gain          | -            | -                                                                                                         | -                |
| Comparison    | OPGP292  | 4q35.2   | 4   | 190260773 | 191261904 | 1001132   | Loss          | Yes          | <i>FRG1; FRG2; LOC100288255; DUX4; DUX4L2; DUX4L3; DUX4L4; DUX4L5; DUX4L6; DUX2; DUX4L7; LOC100653046</i> | -                |
| Comparison    | OPGP87   | 4q35.2   | 4   | 190922957 | 191044517 | 121561    | Gain          | -            | -                                                                                                         | -                |
| Comparison    | OPGP109  | 5p15.33  | 5   | 641475    | 734302    | 92828     | Gain          | -            | <i>CEP72; TPPP</i>                                                                                        | -                |
| Comparison    | OPGP26   | 5p15.33  | 5   | 853686    | 886627    | 32942     | Loss          | -            | <i>ZDHHC11</i>                                                                                            | -                |
| Comparison    | OPGP234  | 5p15.33  | 5   | 870850    | 928018    | 57169     | Gain          | -            | <i>ZDHHC11; BRD9</i>                                                                                      | -                |
| Comparison    | OPGP332  | 5p15.33  | 5   | 870850    | 928018    | 57169     | Gain          | -            | <i>ZDHHC11; BRD9</i>                                                                                      | -                |
| Comparison    | OPGP316  | 5p15.33  | 5   | 1055489   | 1274261   | 218773    | Gain          | Yes          | <i>NKD2; SLC12A7; SLC6A19</i>                                                                             | hsa-miR-4635     |
| Comparison    | OPGP234  | 5p15.2   | 5   | 11798512  | 11820720  | 22209     | Gain          | Yes          | -                                                                                                         | -                |
| Comparison    | OPGP118  | 5p15.2   | 5   | 12251381  | 12493224  | 241844    | Loss          | Yes          | -                                                                                                         | -                |
| Comparison    | OPGP327  | 5p15.2   | 5   | 12568638  | 12705832  | 137195    | Loss          | -            | -                                                                                                         | -                |
| Comparison    | OPGP62   | 5p15.2   | 5   | 12626329  | 12835171  | 208843    | Loss          | -            | -                                                                                                         | -                |
| Comparison    | OPGP23   | 5p15.2   | 5   | 12833942  | 13290184  | 456243    | Gain          | Yes          | -                                                                                                         | -                |
| Comparison    | OPGP44   | 5p15.1   | 5   | 16243137  | 16286148  | 43012     | Loss          | Yes          | -                                                                                                         | -                |
| Comparison    | OPGP155  | 5p15.1   | 5   | 17687887  | 17816216  | 128330    | Loss          | -            | -                                                                                                         | -                |
| Comparison    | OPGP202  | 5p14.3   | 5   | 18608303  | 18622391  | 14089     | Gain          | Yes          | -                                                                                                         | -                |
| Comparison    | OPGP130  | 5p14.3   | 5   | 18619043  | 18668748  | 49706     | Loss          | -            | -                                                                                                         | -                |

| Sample Status | SampleID | Cytoband      | Chr | Start     | End       | Size (bp) | Gain/<br>Loss | Very<br>Rare | Protein-coding Genes in CNV     | miRNAs in<br>CNV |
|---------------|----------|---------------|-----|-----------|-----------|-----------|---------------|--------------|---------------------------------|------------------|
| Comparison    | OPGP83   | 5p14.3        | 5   | 19032838  | 19044681  | 11844     | Gain          | -            |                                 | -                |
| Comparison    | OPGP71   | 5p14.3        | 5   | 19053377  | 19084750  | 31374     | Gain          | Yes          |                                 | -                |
| Comparison    | OPGP83   | 5p14.3        | 5   | 19318840  | 19348690  | 29851     | Gain          | Yes          |                                 | -                |
| Comparison    | OPGP113  | 5p14.3        | 5   | 21885181  | 22025871  | 140691    | Loss          | Yes          | <i>CDH12</i>                    | -                |
| Comparison    | OPGP74   | 5p14.1        | 5   | 26160848  | 26270673  | 109826    | Gain          | Yes          |                                 | -                |
| Comparison    | OPGP217  | 5p13.3        | 5   | 29372002  | 29444560  | 72559     | Loss          | Yes          |                                 | -                |
| Comparison    | OPGP208  | 5p13.2        | 5   | 35894768  | 35905874  | 11107     | Loss          | Yes          | <i>IL7R</i>                     | -                |
| Comparison    | OPGP212  | 5p13.2        | 5   | 36484652  | 36500131  | 15480     | Loss          |              |                                 | -                |
| Comparison    | OPGP256  | 5p13.2        | 5   | 36484652  | 36500131  | 15480     | Loss          |              |                                 | -                |
| Comparison    | OPGP132  | 5p12          | 5   | 43672941  | 44261062  | 588122    | Gain          | Yes          | <i>NNT</i>                      | -                |
| Comparison    | OPGP306  | 5p12          | 5   | 44166372  | 44261062  | 94691     | Loss          | Yes          |                                 | -                |
| Comparison    | OPGP182  | 5q11.2        | 5   | 56382095  | 56399764  | 17670     | Loss          | Yes          |                                 | -                |
| Comparison    | OPGP349  | 5q11.2        | 5   | 56713368  | 57357403  | 644036    | Gain          | Yes          | <i>ACTBL2</i>                   | -                |
| Comparison    | OPGP205  | 5q11.2        | 5   | 57326837  | 57369290  | 42454     | Gain          |              |                                 | -                |
| Comparison    | OPGP132  | 5q11.2        | 5   | 57890289  | 57931235  | 40947     | Gain          | Yes          | <i>RAB3C</i>                    | -                |
| Comparison    | OPGP246  | 5q12.1        | 5   | 61838573  | 62004154  | 165582    | Gain          | Yes          | <i>IPO11; LRRC70</i>            | -                |
| Comparison    | OPGP166  | 5q12.3        | 5   | 63974156  | 64241132  | 266977    | Gain          | Yes          | <i>FAM159B; SREK1IP1; CWC27</i> | -                |
| Comparison    | OPGP3    | 5q13.3        | 5   | 75467195  | 75486315  | 19121     | Gain          |              |                                 | -                |
| Comparison    | OPGP221  | 5q13.3        | 5   | 75647353  | 75682250  | 34898     | Gain          | Yes          | <i>SV2C</i>                     | -                |
| Comparison    | OPGP154  | 5q14.1        | 5   | 78206284  | 78270717  | 64434     | Gain          |              | <i>ARSB</i>                     | -                |
| Comparison    | OPGP154  | 5q14.1        | 5   | 78424694  | 78481227  | 56534     | Gain          |              | <i>BHMT</i>                     | -                |
| Comparison    | OPGP83   | 5q14.2        | 5   | 82547252  | 82727044  | 179793    | Gain          | Yes          | <i>XRCC4</i>                    | -                |
| Comparison    | OPGP17   | 5q14.3        | 5   | 83813535  | 83948279  | 134745    | Loss          |              |                                 | -                |
| Comparison    | OPGP20   | 5q14.3        | 5   | 86780522  | 86821528  | 41007     | Loss          | Yes          |                                 | -                |
| Comparison    | OPGP295  | 5q21.1        | 5   | 99669534  | 99697197  | 27664     | Loss          |              |                                 | -                |
| Comparison    | OPGP130  | 5q21.1        | 5   | 101083537 | 101123064 | 39528     | Gain          |              |                                 | -                |
| Comparison    | OPGP370  | 5q21.1        | 5   | 101219884 | 101283816 | 63933     | Gain          |              |                                 | -                |
| Comparison    | OPGP188  | 5q21.1,5q21.2 | 5   | 102751434 | 102809432 | 57999     | Gain          | Yes          |                                 | -                |
| Comparison    | OPGP58   | 5q21.2        | 5   | 104262266 | 104280607 | 18342     | Gain          | Yes          |                                 | -                |
| Comparison    | OPGP287  | 5q21.2        | 5   | 104283519 | 104385201 | 101683    | Loss          |              |                                 | -                |
| Comparison    | OPGP150  | 5q21.3        | 5   | 104594666 | 104627852 | 33187     | Loss          | Yes          |                                 | -                |
| Comparison    | OPGP105  | 5q21.3        | 5   | 107390269 | 107475020 | 84752     | Loss          | Yes          |                                 | -                |
| Comparison    | OPGP105  | 5q21.3        | 5   | 107527862 | 107543600 | 15739     | Gain          | Yes          |                                 | -                |

| Sample Status | SampleID | Cytoband          | Chr | Start     | End       | Size (bp) | Gain/<br>Loss | Very<br>Rare | Protein-coding Genes in CNV                             | miRNAs in<br>CNV |
|---------------|----------|-------------------|-----|-----------|-----------|-----------|---------------|--------------|---------------------------------------------------------|------------------|
| Comparison    | OPGP20   | 5q21.3            | 5   | 109295971 | 109392292 | 96322     | Gain          | -            |                                                         | -                |
| Comparison    | OPGP276  | 5q22.1            | 5   | 110250786 | 110266346 | 15561     | Loss          | Yes          |                                                         | -                |
| Comparison    | OPGP94   | 5q22.2            | 5   | 112756381 | 112797440 | 41060     | Loss          | Yes          | <i>TSSK1B</i>                                           | -                |
| Comparison    | OPGP62   | 5q22.3            | 5   | 113106234 | 113213272 | 107039    | Loss          | -            |                                                         | -                |
| Comparison    | OPGP345  | 5q23.1            | 5   | 115661373 | 115704298 | 42926     | Loss          | Yes          |                                                         | -                |
| Comparison    | OPGP185  | 5q23.1            | 5   | 117768399 | 118049462 | 281064    | Loss          | Yes          |                                                         | -                |
| Comparison    | OPGP103  | 5q23.1            | 5   | 120083229 | 120099754 | 16526     | Gain          | -            |                                                         | -                |
| Comparison    | OPGP118  | 5q23.1            | 5   | 120083229 | 120096270 | 13042     | Gain          | -            |                                                         | -                |
| Comparison    | OPGP343  | 5q23.1            | 5   | 120084534 | 120099754 | 15221     | Gain          | -            |                                                         | -                |
| Comparison    | OPGP247  | 5q23.3,<br>5q31.1 | 5   | 130013729 | 131087508 | 1073780   | Gain          | Yes          | <i>HINT1; LYRM7; CDC42SE2; RAPGEF6; FNIP1</i>           | -                |
| Comparison    | OPGP175  | 5q31.1            | 5   | 134047374 | 134143412 | 96039     | Gain          | Yes          | <i>SEC24A; CAMLG; DDX46</i>                             | -                |
| Comparison    | OPGP58   | 5q32              | 5   | 143624001 | 143665623 | 41623     | Gain          | Yes          |                                                         | -                |
| Comparison    | OPGP223  | 5q33.1            | 5   | 149576572 | 149605730 | 29159     | Gain          | Yes          | <i>CAMK2A</i>                                           | -                |
| Comparison    | OPGP181  | 5q33.2            | 5   | 152906598 | 152964673 | 58076     | Gain          | Yes          |                                                         | -                |
| Comparison    | OPGP185  | 5q33.3            | 5   | 156334768 | 156580366 | 245599    | Gain          | Yes          | <i>HAVCR1; HAVCR2; MED7; FAM71B; ITK</i>                | -                |
| Comparison    | OPGP152  | 5q34              | 5   | 165653184 | 165666864 | 13681     | Loss          | Yes          |                                                         | -                |
| Comparison    | OPGP53   | 5q34              | 5   | 165771420 | 165782533 | 11114     | Loss          | Yes          |                                                         | -                |
| Comparison    | OPGP19   | 5q34              | 5   | 166750150 | 166766453 | 16304     | Loss          | Yes          |                                                         | -                |
| Comparison    | OPGP358  | 5q35.2            | 5   | 173488073 | 173592953 | 104881    | Gain          | Yes          |                                                         | -                |
| Comparison    | OPGP13   | 5q35.2            | 5   | 175409726 | 175583090 | 173365    | Gain          | -            | <i>FAM153B</i>                                          | -                |
| Comparison    | OPGP367  | 5q35.3            | 5   | 178662194 | 178863916 | 201723    | Gain          | -            | <i>ADAMTS2</i>                                          | -                |
| Comparison    | OPGP242  | 5q35.3            | 5   | 179381594 | 179443248 | 61655     | Loss          | Yes          | <i>RNF130</i>                                           | -                |
| Comparison    | OPGP4    | 5q35.3            | 5   | 179802201 | 180278690 | 476490    | Gain          | Yes          | <i>CNOT6; SCGB3A1; FLT4; OR2Y1; MGAT1; ZFP62; BTNL8</i> | -                |
| Comparison    | OPGP317  | 5q35.3            | 5   | 180508099 | 180541223 | 33125     | Gain          | -            | <i>OR2V2</i>                                            | -                |
| Comparison    | OPGP350  | 6p25.3            | 6   | 94661     | 167304    | 72644     | Loss          | Yes          |                                                         | -                |
| Comparison    | OPGP155  | 6p25.1            | 6   | 5315611   | 5503575   | 187965    | Loss          | Yes          | <i>FARS2</i>                                            | -                |
| Comparison    | OPGP367  | 6p25.1            | 6   | 5501696   | 5524811   | 23116     | Loss          | -            |                                                         | -                |
| Comparison    | OPGP177  | 6p25.1            | 6   | 5511771   | 5532548   | 20778     | Loss          | -            |                                                         | -                |
| Comparison    | OPGP47   | 6p24.3            | 6   | 8537498   | 8664123   | 126626    | Loss          | -            |                                                         | -                |
| Comparison    | OPGP100  | 6p24.3            | 6   | 8975313   | 8987431   | 12119     | Gain          | Yes          |                                                         | -                |
| Comparison    | OPGP320  | 6p22.3            | 6   | 17565591  | 17788094  | 222504    | Gain          | Yes          | <i>CAP2; FAM8A1; NUP153</i>                             | -                |

| Sample Status | SampleID | Cytoband | Chr | Start    | End      | Size (bp) | Gain/<br>Loss | Very<br>Rare | Protein-coding Genes in CNV        | miRNAs in<br>CNV |
|---------------|----------|----------|-----|----------|----------|-----------|---------------|--------------|------------------------------------|------------------|
| Comparison    | OPGP118  | 6p22.3   | 6   | 19005366 | 19016871 | 11506     | Loss          | Yes          | -                                  | -                |
| Comparison    | OPGP157  | 6p22.1   | 6   | 26826110 | 26906239 | 80130     | Gain          | -            | -                                  | -                |
| Comparison    | OPGP339  | 6p22.1   | 6   | 27229203 | 27273066 | 43864     | Loss          | Yes          | -                                  | -                |
| Comparison    | OPGP13   | 6p22.1   | 6   | 27285322 | 27313308 | 27987     | Loss          | -            | -                                  | -                |
| Comparison    | OPGP229  | 6p22.1   | 6   | 28502550 | 28762131 | 259582    | Gain          | Yes          | <i>ZSCAN23; GPX6; GPX5; SCAND3</i> | -                |
| Comparison    | OPGP148  | 6p22.1   | 6   | 29204012 | 29269414 | 65403     | Loss          | -            | <i>OR2J2</i>                       | -                |
| Comparison    | OPGP145  | 6p22.1   | 6   | 29364297 | 29382592 | 18296     | Loss          | Yes          | <i>OR14J1</i>                      | -                |
| Comparison    | OPGP346  | 6p21.31  | 6   | 36385529 | 36410188 | 24660     | Loss          | Yes          | <i>C6orf222</i>                    | -                |
| Comparison    | OPGP136  | 6p21.2   | 6   | 37599494 | 37609945 | 10452     | Loss          | Yes          | -                                  | -                |
| Comparison    | OPGP267  | 6p21.2   | 6   | 37941581 | 38260407 | 318827    | Gain          | Yes          | <i>ZFAND3; BTBD9</i>               | -                |
| Comparison    | OPGP106  | 6p21.1   | 6   | 42010033 | 42023695 | 13663     | Gain          | Yes          | <i>CCND3</i>                       | -                |
| Comparison    | OPGP152  | 6p12.3   | 6   | 46062737 | 46182615 | 119879    | Gain          | Yes          | <i>CLIC5</i>                       | -                |
| Comparison    | OPGP24   | 6p12.3   | 6   | 46182615 | 46266012 | 83398     | Gain          | Yes          | <i>ENPP4; ENPP5</i>                | -                |
| Comparison    | OPGP314  | 6p12.3   | 6   | 49641246 | 49673535 | 32290     | Loss          | Yes          | -                                  | -                |
| Comparison    | OPGP366  | 6p12.3   | 6   | 50305498 | 50317332 | 11835     | Loss          | Yes          | -                                  | -                |
| Comparison    | OPGP178  | 6p11.2   | 6   | 57210013 | 57249352 | 39340     | Loss          | Yes          | -                                  | -                |
| Comparison    | OPGP242  | 6p11.2   | 6   | 57520153 | 57739367 | 219215    | Gain          | -            | <i>PRIM2</i>                       | -                |
| Comparison    | OPGP306  | 6p11.2   | 6   | 57583613 | 57851962 | 268350    | Gain          | -            | <i>PRIM2</i>                       | -                |
| Comparison    | OPGP306  | 6p11.1   | 6   | 58464990 | 58882675 | 417686    | Gain          | -            | -                                  | -                |
| Comparison    | OPGP196  | 6q12     | 6   | 63659441 | 63711303 | 51863     | Loss          | Yes          | -                                  | -                |
| Comparison    | OPGP274  | 6q12     | 6   | 65659578 | 65714245 | 54668     | Loss          | Yes          | <i>EYS</i>                         | -                |
| Comparison    | OPGP20   | 6q12     | 6   | 65954266 | 66545669 | 591404    | Gain          | Yes          | <i>EYS; LOC441155</i>              | -                |
| Comparison    | OPGP141  | 6q12     | 6   | 67189492 | 67395975 | 206484    | Gain          | Yes          | -                                  | -                |
| Comparison    | OPGP290  | 6q12     | 6   | 68731624 | 68793856 | 62233     | Gain          | Yes          | -                                  | -                |
| Comparison    | OPGP196  | 6q13     | 6   | 70308225 | 70323543 | 15319     | Loss          | -            | -                                  | -                |
| Comparison    | OPGP48   | 6q13     | 6   | 74357229 | 74478448 | 121220    | Gain          | -            | <i>SLC17A5; CD109</i>              | -                |
| Comparison    | OPGP262  | 6q14.1   | 6   | 76206233 | 76253570 | 47338     | Loss          | Yes          | -                                  | -                |
| Comparison    | OPGP259  | 6q14.1   | 6   | 76943707 | 76957012 | 13306     | Loss          | Yes          | -                                  | -                |
| Comparison    | OPGP352  | 6q14.1   | 6   | 78800008 | 79185019 | 385012    | Gain          | -            | -                                  | -                |
| Comparison    | OPGP272  | 6q14.3   | 6   | 86531087 | 86606761 | 75675     | Loss          | -            | -                                  | -                |
| Comparison    | OPGP242  | 6q15     | 6   | 89794375 | 89826935 | 32561     | Loss          | Yes          | -                                  | -                |
| Comparison    | OPGP347  | 6q16.1   | 6   | 92817483 | 92839706 | 22224     | Gain          | Yes          | -                                  | -                |
| Comparison    | OPGP174  | 6q16.1   | 6   | 93600268 | 93650997 | 50730     | Loss          | Yes          | -                                  | -                |

| Sample Status | SampleID | Cytoband      | Chr | Start     | End       | Size (bp) | Gain/<br>Loss | Very<br>Rare | Protein-coding Genes in CNV                 | miRNAs in<br>CNV |
|---------------|----------|---------------|-----|-----------|-----------|-----------|---------------|--------------|---------------------------------------------|------------------|
| Comparison    | OPGP226  | 6q16.1        | 6   | 95602570  | 95616875  | 14306     | Gain          | -            |                                             | -                |
| Comparison    | OPGP311  | 6q16.1        | 6   | 95602570  | 95616875  | 14306     | Gain          | -            |                                             | -                |
| Comparison    | OPGP4    | 6q16.1        | 6   | 95673830  | 95724798  | 50969     | Loss          | Yes          |                                             | -                |
| Comparison    | OPGP271  | 6q16.1        | 6   | 97308647  | 97318780  | 10134     | Loss          | -            |                                             | -                |
| Comparison    | OPGP101  | 6q16.3        | 6   | 103237557 | 103262085 | 24529     | Loss          | Yes          |                                             | -                |
| Comparison    | OPGP192  | 6q21          | 6   | 110344844 | 110400167 | 55324     | Loss          | Yes          |                                             | -                |
| Comparison    | OPGP311  | 6q21          | 6   | 112734333 | 112749019 | 14687     | Loss          | -            |                                             | -                |
| Comparison    | OPGP48   | 6q22.1        | 6   | 116529448 | 116858777 | 329330    | Gain          | Yes          | <i>NT5DC1; COL10A1; TSPYL4; TSPYL1; DSE</i> | -                |
| Comparison    | OPGP246  | 6q22.31       | 6   | 118833801 | 118992695 | 158895    | Gain          | -            | <i>CEP85L; PLN</i>                          | -                |
| Comparison    | OPGP34   | 6q22.31       | 6   | 118838161 | 118967398 | 129238    | Gain          | Yes          | <i>CEP85L</i>                               | -                |
| Comparison    | OPGP212  | 6q22.31       | 6   | 118910606 | 118920621 | 10016     | Loss          | Yes          | <i>CEP85L</i>                               | -                |
| Comparison    | OPGP285  | 6q22.31       | 6   | 120388063 | 120490882 | 102820    | Loss          | Yes          | -                                           | -                |
| Comparison    | OPGP254  | 6q22.31       | 6   | 121335988 | 121555376 | 219389    | Loss          | Yes          | <i>C6orf170</i>                             | -                |
| Comparison    | OPGP187  | 6q23.2        | 6   | 132963213 | 133093570 | 130358    | Loss          | Yes          | <i>TAAR2; TAARI; VNNI</i>                   | -                |
| Comparison    | OPGP334  | 6q24.1        | 6   | 141022503 | 141104763 | 82261     | Gain          | Yes          | -                                           | hsa-miR-4465     |
| Comparison    | OPGP351  | 6q24.1        | 6   | 142565022 | 142614314 | 49293     | Loss          | Yes          | <i>VTAL</i>                                 | -                |
| Comparison    | OPGP237  | 6q24.2        | 6   | 145228847 | 145242898 | 14052     | Gain          | -            |                                             | -                |
| Comparison    | OPGP263  | 6q25.1        | 6   | 150221702 | 150341162 | 119461    | Loss          | Yes          | <i>LRP11; RAET1E; RAET1G; ULBP2; ULBP1</i>  | -                |
| Comparison    | OPGP71   | 6q25.1        | 6   | 150450639 | 150467215 | 16577     | Loss          | -            |                                             | -                |
| Comparison    | OPGP333  | 6q25.2        | 6   | 152964606 | 152997648 | 33043     | Loss          | Yes          | <i>SYNE1</i>                                | -                |
| Comparison    | OPGP54   | 6q26          | 6   | 161518941 | 161734297 | 215357    | Gain          | -            | <i>AGPAT4; PARK2</i>                        | -                |
| Comparison    | OPGP300  | 6q26          | 6   | 162543883 | 162568904 | 25022     | Loss          | -            |                                             | -                |
| Comparison    | OPGP359  | 6q26          | 6   | 162911821 | 162979417 | 67597     | Loss          | -            |                                             | -                |
| Comparison    | OPGP108  | 7p22.3        | 7   | 837774    | 984755    | 146982    | Loss          | Yes          | <i>SUN1; GET4; ADAP1; COX19</i>             | -                |
| Comparison    | OPGP185  | 7p22.3,7p22.2 | 7   | 2079588   | 2224642   | 145055    | Loss          | Yes          | <i>MAD1L1</i>                               | -                |
| Comparison    | OPGP111  | 7p22.2        | 7   | 3043205   | 3055596   | 12392     | Gain          | Yes          | -                                           | -                |
| Comparison    | OPGP354  | 7p22.2        | 7   | 3689681   | 3702780   | 13100     | Loss          | Yes          | -                                           | -                |
| Comparison    | OPGP8    | 7p22.1        | 7   | 4910457   | 4927869   | 17413     | Loss          | Yes          | <i>MMD2</i>                                 | -                |
| Comparison    | OPGP193  | 7p22.1        | 7   | 4910457   | 4922064   | 11608     | Loss          | Yes          | <i>MMD2</i>                                 | -                |
| Comparison    | OPGP206  | 7p21.3,7p22.1 | 7   | 7170546   | 7245535   | 74990     | Loss          | Yes          | <i>CIGALT1</i>                              | -                |
| Comparison    | OPGP271  | 7p21.3        | 7   | 7464930   | 7567379   | 102450    | Loss          | Yes          | <i>COL28A1</i>                              | -                |
| Comparison    | OPGP38   | 7p21.3        | 7   | 8322114   | 8686211   | 364098    | Gain          | Yes          | <i>NXPH1</i>                                | -                |
| Comparison    | OPGP188  | 7p21.3        | 7   | 8925485   | 9000195   | 74711     | Gain          | Yes          | -                                           | -                |

| Sample Status | SampleID | Cytoband | Chr | Start    | End      | Size (bp) | Gain/<br>Loss | Very<br>Rare | Protein-coding Genes in CNV | miRNAs in CNV                    |
|---------------|----------|----------|-----|----------|----------|-----------|---------------|--------------|-----------------------------|----------------------------------|
| Comparison    | OPGP346  | 7p21.3   | 7   | 9471158  | 9501930  | 30773     | Gain          | Yes          | -                           | -                                |
| Comparison    | OPGP106  | 7p21.3   | 7   | 10368265 | 10622487 | 254223    | Loss          | Yes          | -                           | -                                |
| Comparison    | OPGP97   | 7p21.3   | 7   | 10534216 | 10569097 | 34882     | Loss          | Yes          | -                           | -                                |
| Comparison    | OPGP362  | 7p21.3   | 7   | 11277010 | 11324760 | 47751     | Loss          | -            | -                           | -                                |
| Comparison    | OPGP215  | 7p21.3   | 7   | 12234020 | 12307224 | 73205     | Gain          | Yes          | <i>TMEM106B</i>             | -                                |
| Comparison    | OPGP79   | 7p21.2   | 7   | 13553937 | 13564466 | 10530     | Loss          | -            | -                           | -                                |
| Comparison    | OPGP30   | 7p21.2   | 7   | 15028484 | 15085410 | 56927     | Loss          | -            | -                           | -                                |
| Comparison    | OPGP370  | 7p21.1   | 7   | 15369491 | 15391936 | 22446     | Loss          | -            | <i>AGMO</i>                 | -                                |
| Comparison    | OPGP215  | 7p21.1   | 7   | 16003433 | 16035549 | 32117     | Loss          | Yes          | -                           | -                                |
| Comparison    | OPGP77   | 7p21.1   | 7   | 16121832 | 16197707 | 75876     | Loss          | Yes          | -                           | -                                |
| Comparison    | OPGP74   | 7p21.1   | 7   | 17017534 | 17033970 | 16437     | Loss          | Yes          | -                           | -                                |
| Comparison    | OPGP344  | 7p21.1   | 7   | 17092924 | 17154865 | 61942     | Loss          | Yes          | -                           | -                                |
| Comparison    | OPGP170  | 7p15.3   | 7   | 20003498 | 20039131 | 35634     | Loss          | Yes          | -                           | -                                |
| Comparison    | OPGP49   | 7p15.3   | 7   | 20100754 | 20150035 | 49282     | Loss          | Yes          | <i>MACC1</i>                | -                                |
| Comparison    | OPGP152  | 7p15.2   | 7   | 24958926 | 24984487 | 25562     | Loss          | Yes          | -                           | -                                |
| Comparison    | OPGP160  | 7p15.2   | 7   | 25081173 | 25108084 | 26912     | Loss          | Yes          | -                           | -                                |
| Comparison    | OPGP251  | 7p14.3   | 7   | 31945813 | 31984018 | 38206     | Loss          | Yes          | -                           | -                                |
| Comparison    | OPGP311  | 7p14.3   | 7   | 33874598 | 33885395 | 10798     | Loss          | Yes          | -                           | -                                |
| Comparison    | OPGP7    | 7p14.2   | 7   | 37363787 | 37439919 | 76133     | Loss          | Yes          | -                           | -                                |
| Comparison    | OPGP48   | 7p14.1   | 7   | 38260626 | 38296343 | 35718     | Loss          | -            | <i>TARP</i>                 | -                                |
| Comparison    | OPGP183  | 7p14.1   | 7   | 38277248 | 38307592 | 30345     | Loss          | -            | -                           | -                                |
| Comparison    | OPGP97   | 7p14.1   | 7   | 38284095 | 38301648 | 17554     | Loss          | -            | -                           | -                                |
| Comparison    | OPGP95   | 7p14.1   | 7   | 38292303 | 38333037 | 40735     | Loss          | -            | -                           | -                                |
| Comparison    | OPGP265  | 7p11.2   | 7   | 54277220 | 54374624 | 97405     | Gain          | Yes          | -                           | -                                |
| Comparison    | OPGP233  | 7p11.2   | 7   | 56038888 | 56115518 | 76631     | Gain          | -            | <i>PSPH; CCT6A; SUMF2</i>   | -                                |
| Comparison    | OPGP235  | 7q11.21  | 7   | 61445025 | 61488622 | 43598     | Loss          | -            | -                           | -                                |
| Comparison    | OPGP188  | 7q11.21  | 7   | 61477137 | 61495810 | 18674     | Loss          | -            | -                           | -                                |
| Comparison    | OPGP137  | 7q11.21  | 7   | 63771570 | 63912686 | 141117    | Loss          | Yes          | <i>ZNF107; ZNF138</i>       | hsa-miR-6839-5p; hsa-miR-6839-3p |
| Comparison    | OPGP45   | 7q11.21  | 7   | 64703608 | 64820943 | 117336    | Loss          | -            | -                           | -                                |
| Comparison    | OPGP43   | 7q11.22  | 7   | 69826272 | 69862679 | 36408     | Loss          | -            | -                           | -                                |
| Comparison    | OPGP254  | 7q11.22  | 7   | 69952960 | 70227885 | 274926    | Gain          | Yes          | -                           | -                                |

| Sample Status | SampleID | Cytoband | Chr | Start     | End       | Size (bp) | Gain/<br>Loss | Very<br>Rare | Protein-coding Genes in CNV                                 | miRNAs in<br>CNV |
|---------------|----------|----------|-----|-----------|-----------|-----------|---------------|--------------|-------------------------------------------------------------|------------------|
| Comparison    | OPGP296  | 7q11.22  | 7   | 71303353  | 71352194  | 48842     | Loss          | Yes          | -                                                           | -                |
| Comparison    | OPGP290  | 7q11.23  | 7   | 71844371  | 71903709  | 59339     | Loss          |              | <i>TYW1B</i>                                                | -                |
| Comparison    | OPGP197  | 7q11.23  | 7   | 75212593  | 75225967  | 13375     | Gain          | Yes          | -                                                           | -                |
| Comparison    | OPGP238  | 7q11.23  | 7   | 75600820  | 75635012  | 34193     | Gain          |              | -                                                           | -                |
| Comparison    | OPGP241  | 7q21.11  | 7   | 80094674  | 80114704  | 20031     | Loss          |              | <i>CD36</i>                                                 | -                |
| Comparison    | OPGP72   | 7q21.11  | 7   | 80094751  | 80114704  | 19954     | Loss          |              | <i>CD36</i>                                                 | -                |
| Comparison    | OPGP165  | 7q21.11  | 7   | 82644704  | 82660873  | 16170     | Gain          | Yes          | -                                                           | -                |
| Comparison    | OPGP330  | 7q21.11  | 7   | 83003272  | 83022856  | 19585     | Gain          | Yes          | -                                                           | -                |
| Comparison    | OPGP147  | 7q21.11  | 7   | 85470643  | 85574947  | 104305    | Loss          | Yes          | -                                                           | -                |
| Comparison    | OPGP37   | 7q21.12  | 7   | 87493459  | 87510328  | 16870     | Loss          |              | -                                                           | -                |
| Comparison    | OPGP13   | 7q21.12  | 7   | 87495495  | 87510328  | 14834     | Loss          |              | -                                                           | -                |
| Comparison    | OPGP178  | 7q21.12  | 7   | 87495495  | 87510328  | 14834     | Loss          |              | -                                                           | -                |
| Comparison    | OPGP55   | 7q21.13  | 7   | 89057298  | 89087497  | 30200     | Gain          |              | -                                                           | -                |
| Comparison    | OPGP335  | 7q21.2   | 7   | 92318357  | 92348281  | 29925     | Loss          |              | -                                                           | -                |
| Comparison    | OPGP172  | 7q21.3   | 7   | 96025677  | 96047043  | 21367     | Gain          | Yes          | -                                                           | -                |
| Comparison    | OPGP343  | 7q22.1   | 7   | 98891250  | 98975124  | 83875     | Gain          | Yes          | <i>CPSF4; ATP5J2; ATP5J2-PTCD1; ZNF789; ZNF394; ZKSCAN5</i> | -                |
| Comparison    | OPGP356  | 7q31.1   | 7   | 110262044 | 110357477 | 95434     | Loss          | Yes          | <i>IMMP2L</i>                                               | -                |
| Comparison    | OPGP76   | 7q31.1   | 7   | 110932812 | 110956463 | 23652     | Loss          |              | <i>IMMP2L</i>                                               | -                |
| Comparison    | OPGP185  | 7q31.1   | 7   | 111097030 | 111140597 | 43568     | Loss          | Yes          | -                                                           | -                |
| Comparison    | OPGP106  | 7q31.31  | 7   | 117319061 | 117373836 | 54776     | Gain          | Yes          | -                                                           | -                |
| Comparison    | OPGP44   | 7q31.31  | 7   | 118319397 | 118350876 | 31480     | Loss          |              | -                                                           | -                |
| Comparison    | OPGP26   | 7q31.31  | 7   | 118328396 | 118348981 | 20586     | Loss          |              | -                                                           | -                |
| Comparison    | OPGP269  | 7q31.31  | 7   | 118639612 | 118819021 | 179410    | Loss          |              | -                                                           | -                |
| Comparison    | OPGP362  | 7q31.31  | 7   | 118639612 | 118819021 | 179410    | Loss          |              | -                                                           | -                |
| Comparison    | OPGP90   | 7q31.33  | 7   | 125371603 | 125398077 | 26475     | Gain          |              | -                                                           | -                |
| Comparison    | OPGP353  | 7q31.33  | 7   | 125371603 | 125402050 | 30448     | Gain          |              | -                                                           | -                |
| Comparison    | OPGP306  | 7q33     | 7   | 133428969 | 133440983 | 12015     | Loss          |              | -                                                           | -                |
| Comparison    | OPGP15   | 7q33     | 7   | 135811683 | 135836026 | 24344     | Loss          | Yes          | -                                                           | -                |
| Comparison    | OPGP214  | 7q35     | 7   | 143311253 | 143321679 | 10427     | Loss          | Yes          | -                                                           | -                |
| Comparison    | OPGP232  | 7q35     | 7   | 145853216 | 145885593 | 32378     | Gain          |              | -                                                           | -                |
| Comparison    | OPGP322  | 7q35     | 7   | 145853798 | 145885593 | 31796     | Gain          |              | -                                                           | -                |
| Comparison    | OPGP135  | 7q36.1   | 7   | 151398408 | 151599221 | 200814    | Gain          |              | <i>GALNT11; KMT2C</i>                                       | -                |



| Sample Status | SampleID | Cytoband      | Chr | Start     | End       | Size (bp) | Gain/<br>Loss | Very<br>Rare | Protein-coding Genes in CNV                                       | miRNAs in<br>CNV |
|---------------|----------|---------------|-----|-----------|-----------|-----------|---------------|--------------|-------------------------------------------------------------------|------------------|
| Comparison    | OPGP113  | 7q36.2        | 7   | 152309916 | 152780053 | 470138    | Gain          | Yes          | -                                                                 | -                |
| Comparison    | OPGP209  | 7q36.3        | 7   | 158266034 | 158575189 | 309156    | Gain          |              | <i>ESYT2; WDR60; VIPR2</i>                                        | -                |
| Comparison    | OPGP277  | 7q36.3        | 7   | 158700100 | 158809412 | 109313    | Gain          |              | -                                                                 | -                |
| Comparison    | OPGP252  | 8p23.3        | 8   | 173696    | 307492    | 133797    | Gain          | Yes          | <i>ZNF596</i>                                                     | -                |
| Comparison    | OPGP220  | 8p23.2        | 8   | 2257735   | 2318174   | 60440     | Loss          | Yes          | -                                                                 | -                |
| Comparison    | OPGP8    | 8p23.2        | 8   | 2711713   | 2722424   | 10712     | Loss          | Yes          | -                                                                 | -                |
| Comparison    | OPGP103  | 8p23.2        | 8   | 3608134   | 3636999   | 28866     | Loss          |              | -                                                                 | -                |
| Comparison    | OPGP204  | 8p23.2        | 8   | 3608134   | 3644140   | 36007     | Loss          |              | -                                                                 | -                |
| Comparison    | OPGP138  | 8p23.2        | 8   | 3796276   | 3811854   | 15579     | Loss          |              | -                                                                 | -                |
| Comparison    | OPGP29   | 8p23.2        | 8   | 4299489   | 4323910   | 24422     | Loss          | Yes          | -                                                                 | -                |
| Comparison    | OPGP119  | 8p23.2        | 8   | 4493322   | 4541100   | 47779     | Loss          | Yes          | -                                                                 | -                |
| Comparison    | OPGP173  | 8p23.2        | 8   | 4805813   | 4816996   | 11184     | Loss          | Yes          | -                                                                 | -                |
| Comparison    | OPGP133  | 8p23.2        | 8   | 4822195   | 4840333   | 18139     | Loss          | Yes          | <i>CSMD1</i>                                                      | -                |
| Comparison    | OPGP5    | 8p23.2        | 8   | 5481630   | 5523610   | 41981     | Loss          | Yes          | -                                                                 | -                |
| Comparison    | OPGP141  | 8p23.2        | 8   | 5659866   | 5680928   | 21063     | Loss          | Yes          | -                                                                 | -                |
| Comparison    | OPGP92   | 8p23.2        | 8   | 5766175   | 6015360   | 249186    | Loss          | Yes          | -                                                                 | -                |
| Comparison    | OPGP59   | 8p23.2        | 8   | 6128679   | 6145668   | 16990     | Loss          |              | -                                                                 | -                |
| Comparison    | OPGP202  | 8p23.1,8p23.2 | 8   | 6136721   | 6228295   | 91575     | Loss          |              | -                                                                 | -                |
| Comparison    | OPGP294  | 8p23.1        | 8   | 6220990   | 6322956   | 101967    | Gain          |              | <i>MCPHI</i>                                                      | -                |
| Comparison    | OPGP229  | 8p23.1        | 8   | 6222765   | 6236366   | 13602     | Loss          | Yes          | -                                                                 | -                |
| Comparison    | OPGP50   | 8p23.1        | 8   | 6639334   | 7000334   | 361001    | Gain          | Yes          | <i>XKR5; DEFB1; DEFA6; DEFA4; DEFA1;<br/>DEFA1B; DEFA3; DEFA5</i> | -                |
| Comparison    | OPGP195  | 8p23.1        | 8   | 8168757   | 8205884   | 37128     | Loss          |              | -                                                                 | -                |
| Comparison    | OPGP159  | 8p23.1        | 8   | 8375229   | 8385745   | 10517     | Gain          | Yes          | -                                                                 | -                |
| Comparison    | OPGP263  | 8p23.1        | 8   | 11018996  | 11056179  | 37184     | Gain          | Yes          | -                                                                 | -                |
| Comparison    | OPGP163  | 8p23.1        | 8   | 11783144  | 11986960  | 203817    | Loss          |              | <i>DEFB136; DEFB135; DEFB134; DEFB130;<br/>LOC100133267</i>       | -                |
| Comparison    | OPGP133  | 8p22          | 8   | 12862253  | 12888812  | 26560     | Gain          |              | -                                                                 | -                |
| Comparison    | OPGP306  | 8p22          | 8   | 16462741  | 16577248  | 114508    | Loss          |              | -                                                                 | -                |
| Comparison    | OPGP82   | 8p22          | 8   | 17709875  | 17754832  | 44958     | Loss          | Yes          | -                                                                 | -                |
| Comparison    | OPGP64   | 8p22          | 8   | 18707763  | 18735393  | 27631     | Loss          | Yes          | <i>PSD3</i>                                                       | -                |
| Comparison    | OPGP355  | 8p22          | 8   | 18849748  | 18903101  | 53354     | Loss          |              | -                                                                 | -                |
| Comparison    | OPGP64   | 8p12          | 8   | 32415229  | 32440158  | 24930     | Gain          | Yes          | -                                                                 | -                |

| Sample Status | SampleID | Cytoband      | Chr | Start     | End       | Size (bp) | Gain/<br>Loss | Very<br>Rare | Protein-coding Genes in CNV | miRNAs in<br>CNV |
|---------------|----------|---------------|-----|-----------|-----------|-----------|---------------|--------------|-----------------------------|------------------|
| Comparison    | OPGP151  | 8q11.21       | 8   | 48331797  | 48391592  | 59796     | Gain          |              | <i>KIAA0146</i>             | -                |
| Comparison    | OPGP245  | 8q11.21       | 8   | 48337198  | 48467466  | 130269    | Gain          | Yes          | <i>KIAA0146</i>             | -                |
| Comparison    | OPGP201  | 8q11.21       | 8   | 50255830  | 50346706  | 90877     | Gain          | Yes          | -                           | -                |
| Comparison    | OPGP125  | 8q11.23       | 8   | 53163983  | 53200562  | 36580     | Loss          | Yes          | <i>ST18</i>                 | -                |
| Comparison    | OPGP69   | 8q12.1        | 8   | 55846938  | 56174269  | 327332    | Loss          | Yes          | -                           | -                |
| Comparison    | OPGP215  | 8q12.3        | 8   | 62544158  | 62564548  | 20391     | Gain          |              | -                           | -                |
| Comparison    | OPGP213  | 8q12.3        | 8   | 65409538  | 65420057  | 10520     | Loss          |              | -                           | -                |
| Comparison    | OPGP127  | 8q13.1        | 8   | 67952366  | 67983383  | 31018     | Loss          | Yes          | <i>MCMDC2</i>               | -                |
| Comparison    | OPGP49   | 8q13.2        | 8   | 68188369  | 68324256  | 135888    | Gain          | Yes          | <i>CSPP1; ARFGEF1</i>       | -                |
| Comparison    | OPGP32   | 8q13.2        | 8   | 69891186  | 69977415  | 86230     | Gain          |              | <i>C8orf34</i>              | -                |
| Comparison    | OPGP256  | 8q21.3        | 8   | 88226672  | 88249601  | 22930     | Loss          | Yes          | -                           | -                |
| Comparison    | OPGP244  | 8q21.3        | 8   | 90540918  | 90857097  | 316180    | Gain          | Yes          | <i>RIPK2</i>                | -                |
| Comparison    | OPGP337  | 8q21.3        | 8   | 90906777  | 90923153  | 16377     | Loss          | Yes          | -                           | -                |
| Comparison    | OPGP274  | 8q21.3        | 8   | 92188183  | 92253014  | 64832     | Loss          |              | <i>LRRC69</i>               | -                |
| Comparison    | OPGP352  | 8q22.1        | 8   | 95811805  | 95848084  | 36280     | Loss          | Yes          | <i>DPY19L4</i>              | -                |
| Comparison    | OPGP359  | 8q22.3,8q23.1 | 8   | 106053559 | 106172202 | 118644    | Loss          | Yes          | -                           | -                |
| Comparison    | OPGP195  | 8q22.3,8q23.1 | 8   | 106057535 | 106115416 | 57882     | Gain          | Yes          | -                           | -                |
| Comparison    | OPGP17   | 8q23.3        | 8   | 115329458 | 115344977 | 15520     | Loss          |              | -                           | -                |
| Comparison    | OPGP282  | 8q23.3        | 8   | 115818013 | 115979174 | 161162    | Loss          | Yes          | -                           | -                |
| Comparison    | OPGP91   | 8q24.11       | 8   | 118987651 | 118998009 | 10359     | Loss          | Yes          | -                           | -                |
| Comparison    | OPGP5    | 8q24.12       | 8   | 121483185 | 121517071 | 33887     | Loss          | Yes          | <i>MRPL13</i>               | -                |
| Comparison    | OPGP208  | 8q24.13       | 8   | 126139466 | 126192164 | 52699     | Loss          | Yes          | <i>KIAA0196; NSMCE2</i>     | -                |
| Comparison    | OPGP283  | 8q24.21       | 8   | 127720085 | 127732229 | 12145     | Loss          | Yes          | -                           | -                |
| Comparison    | OPGP98   | 8q24.21       | 8   | 128699305 | 128737551 | 38247     | Loss          | Yes          | -                           | -                |
| Comparison    | OPGP319  | 8q24.21       | 8   | 130932838 | 131191826 | 258989    | Gain          |              | <i>FAM49B; ASAP1</i>        | hsa-miR-5194     |
| Comparison    | OPGP316  | 8q24.3        | 8   | 143368085 | 143455401 | 87317     | Gain          | Yes          | <i>TSNARE1</i>              | -                |
| Comparison    | OPGP147  | 9p24.3        | 9   | 324524    | 360439    | 35916     | Loss          | Yes          | <i>DOCK8</i>                | -                |
| Comparison    | OPGP110  | 9p24.3        | 9   | 407448    | 612360    | 204913    | Gain          |              | <i>DOCK8</i>                | -                |
| Comparison    | OPGP27   | 9p24.3        | 9   | 500700    | 521826    | 21127     | Loss          |              | -                           | -                |
| Comparison    | OPGP147  | 9p24.3        | 9   | 515764    | 816427    | 300664    | Gain          |              | <i>KANK1</i>                | -                |
| Comparison    | OPGP360  | 9p24.3        | 9   | 551382    | 789644    | 238263    | Gain          | Yes          | <i>KANK1</i>                | -                |
| Comparison    | OPGP60   | 9p24.3        | 9   | 1267906   | 1288566   | 20661     | Gain          | Yes          | -                           | -                |
| Comparison    | OPGP354  | 9p24.3        | 9   | 1486230   | 1568049   | 81820     | Loss          |              | -                           | -                |

| Sample Status | SampleID | Cytoband | Chr | Start    | End      | Size (bp) | Gain/<br>Loss | Very<br>Rare | Protein-coding Genes in CNV       | miRNAs in<br>CNV |
|---------------|----------|----------|-----|----------|----------|-----------|---------------|--------------|-----------------------------------|------------------|
| Comparison    | OPGP16   | 9p24.3   | 9   | 1490329  | 1504391  | 14063     | Loss          | -            | -                                 | -                |
| Comparison    | OPGP344  | 9p24.3   | 9   | 1490329  | 1504391  | 14063     | Loss          | -            | -                                 | -                |
| Comparison    | OPGP111  | 9p24.2   | 9   | 2278588  | 2342431  | 63844     | Loss          | Yes          | -                                 | -                |
| Comparison    | OPGP140  | 9p24.1   | 9   | 5375779  | 5388011  | 12233     | Loss          | -            | -                                 | -                |
| Comparison    | OPGP213  | 9p24.1   | 9   | 6614484  | 6660448  | 45965     | Loss          | -            | <i>GLDC</i>                       | -                |
| Comparison    | OPGP274  | 9p24.1   | 9   | 7721398  | 7762912  | 41515     | Loss          | -            | -                                 | -                |
| Comparison    | OPGP344  | 9p24.1   | 9   | 7861163  | 7922619  | 61457     | Loss          | Yes          | -                                 | -                |
| Comparison    | OPGP210  | 9p23     | 9   | 9324204  | 9577948  | 253745    | Loss          | Yes          | -                                 | -                |
| Comparison    | OPGP161  | 9p23     | 9   | 9545365  | 9562879  | 17515     | Gain          | Yes          | -                                 | -                |
| Comparison    | OPGP88   | 9p23     | 9   | 9985482  | 10028041 | 42560     | Loss          | -            | -                                 | -                |
| Comparison    | OPGP161  | 9p23     | 9   | 10244793 | 10315264 | 70472     | Gain          | Yes          | -                                 | -                |
| Comparison    | OPGP2    | 9p23     | 9   | 11247448 | 11266796 | 19349     | Loss          | Yes          | -                                 | -                |
| Comparison    | OPGP213  | 9p23     | 9   | 12902368 | 12925849 | 23482     | Loss          | Yes          | -                                 | -                |
| Comparison    | OPGP263  | 9p22.3   | 9   | 15844376 | 15934791 | 90416     | Gain          | Yes          | <i>CCDC171</i>                    | -                |
| Comparison    | OPGP258  | 9p22.3   | 9   | 15898399 | 15970320 | 71922     | Loss          | Yes          | <i>CCDC171</i>                    | -                |
| Comparison    | OPGP143  | 9p22.2   | 9   | 18172087 | 18238172 | 66086     | Loss          | Yes          | -                                 | -                |
| Comparison    | OPGP21   | 9p22.1   | 9   | 19275457 | 19320042 | 44586     | Loss          | Yes          | <i>DENND4C</i>                    | -                |
| Comparison    | OPGP167  | 9p21.3   | 9   | 20599706 | 20629298 | 29593     | Gain          | Yes          | <i>MLLT3</i>                      | -                |
| Comparison    | OPGP122  | 9p21.3   | 9   | 22499340 | 22555485 | 56146     | Loss          | Yes          | -                                 | -                |
| Comparison    | OPGP133  | 9p21.3   | 9   | 22679215 | 22742395 | 63181     | Loss          | Yes          | -                                 | -                |
| Comparison    | OPGP62   | 9p21.3   | 9   | 23068341 | 23084676 | 16336     | Loss          | -            | -                                 | -                |
| Comparison    | OPGP120  | 9p21.2   | 9   | 27317823 | 27366422 | 48600     | Gain          | Yes          | <i>MOB3B</i>                      | -                |
| Comparison    | OPGP363  | 9p21.1   | 9   | 30548753 | 30733422 | 184670    | Loss          | -            | -                                 | -                |
| Comparison    | OPGP84   | 9p21.1   | 9   | 32621821 | 32700249 | 78429     | Gain          | Yes          | <i>TAFIL</i>                      | -                |
| Comparison    | OPGP268  | 9p11.2   | 9   | 44054868 | 44183429 | 128562    | Loss          | -            | -                                 | -                |
| Comparison    | OPGP231  | 9q12     | 9   | 66324679 | 67489865 | 1165187   | Loss          | -            | -                                 | -                |
| Comparison    | OPGP287  | 9q21.11  | 9   | 70769646 | 71032843 | 263198    | Gain          | -            | <i>PIP5K1B; PRKACG; FXN; TJP2</i> | -                |
| Comparison    | OPGP239  | 9q21.13  | 9   | 73309592 | 73481836 | 172245    | Gain          | Yes          | -                                 | -                |
| Comparison    | OPGP180  | 9q21.13  | 9   | 77174742 | 77230547 | 55806     | Gain          | Yes          | -                                 | -                |
| Comparison    | OPGP246  | 9q21.33  | 9   | 86876079 | 86901212 | 25134     | Gain          | Yes          | -                                 | -                |
| Comparison    | OPGP143  | 9q22.31  | 9   | 93327123 | 93377810 | 50688     | Gain          | Yes          | -                                 | -                |
| Comparison    | OPGP143  | 9q22.31  | 9   | 93454057 | 93567716 | 113660    | Gain          | Yes          | <i>ROR2</i>                       | -                |
| Comparison    | OPGP75   | 9q22.31  | 9   | 93470353 | 93484097 | 13745     | Gain          | Yes          | -                                 | -                |

| Sample Status | SampleID | Cytoband             | Chr | Start     | End       | Size (bp) | Gain/<br>Loss | Very<br>Rare | Protein-coding Genes in CNV                                                         | miRNAs in<br>CNV              |
|---------------|----------|----------------------|-----|-----------|-----------|-----------|---------------|--------------|-------------------------------------------------------------------------------------|-------------------------------|
| Comparison    | OPGP269  | 9q22.32              | 9   | 96532816  | 96545429  | 12614     | Loss          | Yes          | -                                                                                   | -                             |
| Comparison    | OPGP177  | 9q31.1               | 9   | 103977934 | 104019392 | 41459     | Loss          | -            | -                                                                                   | -                             |
| Comparison    | OPGP195  | 9q31.1               | 9   | 103977934 | 104019392 | 41459     | Loss          | -            | -                                                                                   | -                             |
| Comparison    | OPGP81   | 9q31.1               | 9   | 104241445 | 104276991 | 35547     | Loss          | -            | -                                                                                   | -                             |
| Comparison    | OPGP281  | 9q31.1               | 9   | 104300323 | 104350673 | 50351     | Loss          | Yes          | -                                                                                   | -                             |
| Comparison    | OPGP170  | 9q31.1               | 9   | 104803239 | 104846815 | 43577     | Loss          | -            | <i>CYLC2</i>                                                                        | -                             |
| Comparison    | OPGP238  | 9q31.1               | 9   | 105438547 | 105465488 | 26942     | Loss          | Yes          | -                                                                                   | -                             |
| Comparison    | OPGP293  | 9q33.1               | 9   | 121280124 | 121301012 | 20889     | Loss          | Yes          | -                                                                                   | -                             |
| Comparison    | OPGP120  | 9q34.12              | 9   | 132673269 | 132690607 | 17339     | Loss          | -            | -                                                                                   | -                             |
| Comparison    | OPGP363  | 9q34.13              | 9   | 133789187 | 133819010 | 29824     | Loss          | Yes          | <i>MED27</i>                                                                        | -                             |
| Comparison    | OPGP316  | 9q34.3               | 9   | 136734887 | 136764182 | 29296     | Gain          | Yes          | <i>COL5A1</i>                                                                       | -                             |
| Comparison    | OPGP227  | 9q34.3               | 9   | 138501746 | 138672282 | 170537    | Gain          | Yes          | <i>NOTCH1</i>                                                                       | hsa-miR-4673;<br>hsa-miR-4674 |
| Comparison    | OPGP350  | 9q34.3               | 9   | 140130278 | 140211215 | 80938     | Gain          | -            | <i>CACNA1B</i>                                                                      | -                             |
| Comparison    | OPGP60   | 9q34.3               | 9   | 140138244 | 140211215 | 72972     | Gain          | -            | -                                                                                   | -                             |
| Comparison    | OPGP42   | 10p15.3              | 10  | 1982646   | 2085776   | 103131    | Gain          | Yes          | -                                                                                   | -                             |
| Comparison    | OPGP301  | 10p15.3              | 10  | 2610938   | 2625988   | 15051     | Loss          | Yes          | -                                                                                   | -                             |
| Comparison    | OPGP103  | 10p15.1              | 10  | 4934031   | 5023303   | 89273     | Loss          | -            | <i>AKR1C1; AKR1C2</i>                                                               | -                             |
| Comparison    | OPGP236  | 10p14                | 10  | 6710753   | 6878948   | 168196    | Gain          | -            | -                                                                                   | -                             |
| Comparison    | OPGP293  | 10p14                | 10  | 7602955   | 7621471   | 18517     | Loss          | Yes          | -                                                                                   | -                             |
| Comparison    | OPGP309  | 10p14                | 10  | 7672510   | 7684255   | 11746     | Loss          | Yes          | -                                                                                   | -                             |
| Comparison    | OPGP321  | 10p12.33             | 10  | 17349910  | 17530579  | 180670    | Loss          | Yes          | <i>ST8SIA6</i>                                                                      | -                             |
| Comparison    | OPGP365  | 10p12.31             | 10  | 20902433  | 21064339  | 161907    | Gain          | Yes          | -                                                                                   | -                             |
| Comparison    | OPGP18   | 10p11.21             | 10  | 34924387  | 34966167  | 41781     | Loss          | -            | -                                                                                   | -                             |
| Comparison    | OPGP198  | 10p11.21             | 10  | 34924387  | 34966167  | 41781     | Loss          | -            | -                                                                                   | -                             |
| Comparison    | OPGP237  | 10p11.21             | 10  | 35200211  | 35348514  | 148304    | Gain          | Yes          | <i>CUL2</i>                                                                         | -                             |
| Comparison    | OPGP293  | 10p11.21             | 10  | 35565000  | 35647246  | 82247     | Gain          | Yes          | -                                                                                   | -                             |
| Comparison    | OPGP161  | 10p11.21,<br>10p11.1 | 10  | 38330579  | 39053715  | 723137    | Gain          | -            | <i>ZNF33A; ZNF37A</i><br><i>TMEM72; RASSF4; C10orf10; C10orf25;</i><br><i>ZNF22</i> | -                             |
| Comparison    | OPGP210  | 10q11.21             | 10  | 44739339  | 44868035  | 128697    | Gain          | Yes          | <i>ZNF22</i>                                                                        | -                             |
| Comparison    | OPGP163  | 10q11.22             | 10  | 47016329  | 47058971  | 42643     | Gain          | -            | -                                                                                   | -                             |
| Comparison    | OPGP136  | 10q11.22             | 10  | 47136186  | 47213522  | 77337     | Gain          | -            | -                                                                                   | -                             |
| Comparison    | OPGP90   | 10q21.1              | 10  | 54191096  | 54201691  | 10596     | Loss          | -            | <i>MBL2</i>                                                                         | -                             |

| Sample Status | SampleID | Cytoband | Chr | Start     | End       | Size (bp) | Gain/<br>Loss | Very<br>Rare | Protein-coding Genes in CNV                  | miRNAs in<br>CNV |
|---------------|----------|----------|-----|-----------|-----------|-----------|---------------|--------------|----------------------------------------------|------------------|
| Comparison    | OPGP117  | 10q21.1  | 10  | 54348119  | 54363972  | 15854     | Gain          | -            |                                              | -                |
| Comparison    | OPGP272  | 10q21.1  | 10  | 55882676  | 55902378  | 19703     | Gain          | Yes          |                                              | -                |
| Comparison    | OPGP205  | 10q21.1  | 10  | 56979431  | 57003485  | 24055     | Gain          | Yes          |                                              | -                |
| Comparison    | OPGP316  | 10q21.1  | 10  | 58880511  | 58914629  | 34119     | Loss          | Yes          |                                              | -                |
| Comparison    | OPGP310  | 10q21.3  | 10  | 67969885  | 67987833  | 17949     | Loss          | -            |                                              | -                |
| Comparison    | OPGP334  | 10q22.2  | 10  | 75669152  | 75930726  | 261575    | Loss          | Yes          | <i>ADK</i>                                   | -                |
| Comparison    | OPGP370  | 10q23.31 | 10  | 92141441  | 92324568  | 183128    | Loss          | -            |                                              | -                |
| Comparison    | OPGP329  | 10q24.1  | 10  | 98269043  | 98460286  | 191244    | Gain          | Yes          | <i>TM9SF3; PIK3AP1</i>                       | -                |
| Comparison    | OPGP33   | 10q24.32 | 10  | 103278255 | 103313556 | 35302     | Gain          | -            | <i>BTRC</i>                                  | -                |
| Comparison    | OPGP215  | 10q24.33 | 10  | 105148048 | 105303220 | 155173    | Gain          | Yes          | <i>PDCD11; CALHM2; CALHM1; CALHM3; NEURL</i> | -                |
| Comparison    | OPGP141  | 10q24.33 | 10  | 105161626 | 105197652 | 36027     | Gain          | -            | <i>PDCD11; CALHM2</i>                        | -                |
| Comparison    | OPGP47   | 10q25.1  | 10  | 109173710 | 109184496 | 10787     | Loss          | -            |                                              | -                |
| Comparison    | OPGP62   | 10q25.1  | 10  | 109173710 | 109184863 | 11154     | Loss          | -            |                                              | -                |
| Comparison    | OPGP361  | 10q25.3  | 10  | 117248910 | 117305474 | 56565     | Loss          | Yes          | <i>ATRNL1</i>                                | -                |
| Comparison    | OPGP110  | 10q26.12 | 10  | 122419759 | 122459873 | 40115     | Gain          | Yes          |                                              | -                |
| Comparison    | OPGP225  | 10q26.3  | 10  | 130363010 | 131616730 | 1253721   | Gain          | Yes          | <i>MGMT; EBF3</i>                            | hsa-miR-4297     |
| Comparison    | OPGP148  | 10q26.3  | 10  | 130941167 | 130961684 | 20518     | Gain          | Yes          |                                              | -                |
| Comparison    | OPGP45   | 10q26.3  | 10  | 133999987 | 134027438 | 27452     | Gain          | Yes          | <i>LRRC27</i>                                | -                |
| Comparison    | OPGP210  | 10q26.3  | 10  | 134005903 | 134054275 | 48373     | Gain          | Yes          | <i>LRRC27</i>                                | -                |
| Comparison    | OPGP246  | 11p15.4  | 11  | 4293106   | 4346177   | 53072     | Gain          | -            | <i>OR52B4</i>                                | -                |
| Comparison    | OPGP7    | 11p15.4  | 11  | 4762510   | 4868483   | 105974    | Loss          | -            | <i>OR52R1; OR51F2; OR51S1; OR51T1</i>        | -                |
| Comparison    | OPGP184  | 11p15.4  | 11  | 9779172   | 9845638   | 66467     | Loss          | Yes          | <i>SBF2</i>                                  | -                |
| Comparison    | OPGP208  | 11p15.3  | 11  | 11505249  | 11516232  | 10984     | Gain          | Yes          |                                              | -                |
| Comparison    | OPGP67   | 11p15.1  | 11  | 21471167  | 21527034  | 55868     | Loss          | Yes          | <i>NELL1</i>                                 | -                |
| Comparison    | OPGP245  | 11p14.3  | 11  | 22178229  | 22215184  | 36956     | Gain          | -            | <i>ANO5</i>                                  | -                |
| Comparison    | OPGP260  | 11p14.3  | 11  | 23772032  | 23809934  | 37903     | Gain          | Yes          |                                              | -                |
| Comparison    | OPGP57   | 11p14.3  | 11  | 25815436  | 25875452  | 60017     | Gain          | -            |                                              | -                |
| Comparison    | OPGP48   | 11p14.1  | 11  | 30029067  | 30059899  | 30833     | Gain          | Yes          |                                              | -                |
| Comparison    | OPGP230  | 11p14.1  | 11  | 30708854  | 30720172  | 11319     | Loss          | Yes          |                                              | -                |
| Comparison    | OPGP235  | 11p13    | 11  | 31226693  | 31282996  | 56304     | Loss          | Yes          | <i>DCDC1</i>                                 | -                |
| Comparison    | OPGP247  | 11p13    | 11  | 36351090  | 36373228  | 22139     | Gain          | Yes          | <i>PRR5L</i>                                 | -                |
| Comparison    | OPGP305  | 11p12    | 11  | 36512834  | 36529598  | 16765     | Loss          | Yes          |                                              | -                |

| Sample Status | SampleID | Cytoband          | Chr | Start     | End       | Size (bp) | Gain/<br>Loss | Very<br>Rare | Protein-coding Genes in CNV                                                                               | miRNAs in<br>CNV |
|---------------|----------|-------------------|-----|-----------|-----------|-----------|---------------|--------------|-----------------------------------------------------------------------------------------------------------|------------------|
| Comparison    | OPGP361  | 11p12             | 11  | 40497095  | 40547130  | 50036     | Loss          | Yes          | -                                                                                                         | -                |
| Comparison    | OPGP352  | 11p12             | 11  | 42243624  | 42283729  | 40106     | Loss          | -            | -                                                                                                         | -                |
| Comparison    | OPGP79   | 11p12,<br>11p11.2 | 11  | 43385497  | 43408695  | 23199     | Gain          | Yes          | <i>TTC17</i>                                                                                              | -                |
| Comparison    | OPGP72   | 11p11.12          | 11  | 50050824  | 50088001  | 37178     | Gain          | -            | -                                                                                                         | -                |
| Comparison    | OPGP72   | 11p11.12          | 11  | 50300418  | 50375651  | 75234     | Gain          | -            | -                                                                                                         | -                |
| Comparison    | OPGP276  | 11p11.12          | 11  | 50374125  | 50707934  | 333810    | Gain          | -            | -                                                                                                         | -                |
| Comparison    | OPGP72   | 11p11.12          | 11  | 50402842  | 50725893  | 323052    | Gain          | -            | -                                                                                                         | -                |
| Comparison    | OPGP354  | 11p11.12          | 11  | 51061717  | 51209565  | 147849    | Gain          | -            | -                                                                                                         | -                |
| Comparison    | OPGP142  | 11q11             | 11  | 54514520  | 55119916  | 605397    | Gain          | -            | <i>TRIM48; OR4A16; OR4A15; OR4C15;<br/>OR4C16</i>                                                         | -                |
| Comparison    | OPGP103  | 11q11             | 11  | 55119916  | 55130607  | 10692     | Loss          | -            | <i>OR4C11</i>                                                                                             | -                |
| Comparison    | OPGP142  | 11q11             | 11  | 55217259  | 55580468  | 363210    | Gain          | -            | <i>OR5D13; OR5D14; OR5L1; OR5D18;<br/>OR5L2; OR5D16; TRIM51; OR5W2; OR5I1;<br/>OR10AG1; OR5F1; OR5AS1</i> | -                |
| Comparison    | OPGP216  | 11q11             | 11  | 55534978  | 55803476  | 268499    | Loss          | Yes          | <i>OR5AS1; OR8I2; OR8H2; OR8H3; OR8J3;<br/>OR8K5; OR5J2; OR5T2; OR5T3; OR5T1</i>                          | -                |
| Comparison    | OPGP142  | 11q11             | 11  | 55612642  | 55665287  | 52646     | Gain          | Yes          | <i>OR8I2; OR8H2; OR8H3; OR8J3</i>                                                                         | -                |
| Comparison    | OPGP142  | 11q11             | 11  | 55675275  | 55817112  | 141838    | Loss          | Yes          | <i>OR8K5; OR5J2; OR5T2; OR5T3; OR5T1;<br/>OR8H1</i>                                                       | -                |
| Comparison    | OPGP68   | 11q13.2           | 11  | 68480846  | 68493638  | 12793     | Loss          | Yes          | -                                                                                                         | -                |
| Comparison    | OPGP232  | 11q14.1           | 11  | 79787170  | 79797431  | 10262     | Loss          | Yes          | -                                                                                                         | -                |
| Comparison    | OPGP198  | 11q14.1           | 11  | 80740796  | 80869319  | 128524    | Loss          | Yes          | -                                                                                                         | -                |
| Comparison    | OPGP190  | 11q14.1           | 11  | 81148189  | 81273174  | 124986    | Loss          | -            | -                                                                                                         | -                |
| Comparison    | OPGP96   | 11q14.1           | 11  | 81544396  | 81558237  | 13842     | Gain          | Yes          | -                                                                                                         | -                |
| Comparison    | OPGP106  | 11q14.1           | 11  | 82267274  | 82383896  | 116623    | Gain          | Yes          | <i>PRCP; C11orf82; RAB30</i>                                                                              | -                |
| Comparison    | OPGP206  | 11q14.1           | 11  | 84214283  | 84247827  | 33545     | Loss          | -            | -                                                                                                         | -                |
| Comparison    | OPGP356  | 11q14.1           | 11  | 85111335  | 85153088  | 41754     | Loss          | -            | <i>SYTL2</i>                                                                                              | -                |
| Comparison    | OPGP310  | 11q14.2           | 11  | 86990429  | 87033092  | 42664     | Loss          | Yes          | -                                                                                                         | -                |
| Comparison    | OPGP102  | 11q14.3           | 11  | 89457958  | 89787171  | 329214    | Loss          | Yes          | <i>UBTF1; NAALAD2; CHORDC1</i>                                                                            | -                |
| Comparison    | OPGP298  | 11q14.3           | 11  | 89791938  | 89890660  | 98723     | Loss          | Yes          | -                                                                                                         | -                |
| Comparison    | OPGP194  | 11q14.3           | 11  | 91198725  | 92219783  | 1021059   | Gain          | Yes          | <i>FAT3</i>                                                                                               | -                |
| Comparison    | OPGP1    | 11q22.1           | 11  | 101399150 | 101492312 | 93163     | Gain          | Yes          | <i>C11orf70; YAPI</i>                                                                                     | -                |
| Comparison    | OPGP336  | 11q22.3           | 11  | 102848464 | 102885522 | 37059     | Gain          | -            | <i>DYNC2H1</i>                                                                                            | -                |

| Sample Status | SampleID | Cytoband | Chr | Start     | End       | Size (bp) | Gain/<br>Loss | Very<br>Rare | Protein-coding Genes in CNV        | miRNAs in<br>CNV |
|---------------|----------|----------|-----|-----------|-----------|-----------|---------------|--------------|------------------------------------|------------------|
| Comparison    | OPGP64   | 11q23.1  | 11  | 111549205 | 111592334 | 43130     | Loss          | Yes          | <i>BCO2</i>                        | -                |
| Comparison    | OPGP179  | 11q23.1  | 11  | 111844695 | 111890870 | 46176     | Loss          |              | -                                  | -                |
| Comparison    | OPGP367  | 11q23.3  | 11  | 117873790 | 117930629 | 56840     | Gain          | Yes          | <i>KMT2A; TTC36; TMEM25; IFT46</i> | -                |
| Comparison    | OPGP307  | 11q25    | 11  | 133849852 | 133863806 | 13955     | Loss          |              | -                                  | -                |
| Comparison    | OPGP270  | 11q25    | 11  | 134352738 | 134449982 | 97245     | Loss          | Yes          | -                                  | -                |
| Comparison    | OPGP317  | 12p13.33 | 12  | 30887     | 104526    | 73640     | Loss          | Yes          | <i>IQSEC3</i>                      | -                |
| Comparison    | OPGP22   | 12p13.32 | 12  | 5106123   | 5264317   | 158195    | Loss          |              | -                                  | -                |
| Comparison    | OPGP35   | 12p13.31 | 12  | 5577633   | 6102612   | 524980    | Loss          | Yes          | <i>ANO2; VWF</i>                   | -                |
| Comparison    | OPGP195  | 12p13.31 | 12  | 9344838   | 9387669   | 42832     | Gain          | Yes          | -                                  | -                |
| Comparison    | OPGP150  | 12p12.1  | 12  | 21445967  | 21469538  | 23572     | Gain          |              | -                                  | -                |
| Comparison    | OPGP35   | 12p11.22 | 12  | 29097338  | 29113119  | 15782     | Gain          |              | -                                  | -                |
| Comparison    | OPGP65   | 12p11.22 | 12  | 30282738  | 30302354  | 19617     | Gain          |              | -                                  | -                |
| Comparison    | OPGP353  | 12p11.21 | 12  | 30841413  | 31092984  | 251572    | Gain          | Yes          | <i>TSPAN11</i>                     | -                |
| Comparison    | OPGP158  | 12p11.21 | 12  | 32308006  | 32333520  | 25515     | Gain          | Yes          | -                                  | -                |
| Comparison    | OPGP269  | 12p11.21 | 12  | 32448256  | 32508065  | 59810     | Loss          | Yes          | -                                  | -                |
| Comparison    | OPGP128  | 12q11    | 12  | 36340414  | 36394320  | 53907     | Loss          |              | -                                  | -                |
| Comparison    | OPGP64   | 12q12    | 12  | 40300400  | 40362608  | 62209     | Gain          | Yes          | -                                  | -                |
| Comparison    | OPGP268  | 12q13.13 | 12  | 50799017  | 50846239  | 47223     | Gain          | Yes          | -                                  | -                |
| Comparison    | OPGP112  | 12q15    | 12  | 67739183  | 67750568  | 11386     | Loss          | Yes          | -                                  | -                |
| Comparison    | OPGP122  | 12q21.1  | 12  | 71730857  | 71783326  | 52470     | Loss          | Yes          | -                                  | -                |
| Comparison    | OPGP191  | 12q21.1  | 12  | 72084450  | 72104775  | 20326     | Loss          |              | -                                  | -                |
| Comparison    | OPGP285  | 12q21.1  | 12  | 72593059  | 72710188  | 117130    | Loss          |              | -                                  | -                |
| Comparison    | OPGP57   | 12q21.1  | 12  | 72595814  | 72710188  | 114375    | Loss          |              | -                                  | -                |
| Comparison    | OPGP153  | 12q21.1  | 12  | 72595814  | 72710188  | 114375    | Loss          |              | -                                  | -                |
| Comparison    | OPGP126  | 12q21.2  | 12  | 74329241  | 74480712  | 151472    | Gain          | Yes          | -                                  | -                |
| Comparison    | OPGP97   | 12q21.31 | 12  | 79156468  | 79255527  | 99060     | Loss          | Yes          | <i>OTOGL</i>                       | -                |
| Comparison    | OPGP366  | 12q21.31 | 12  | 82994027  | 83226213  | 232187    | Gain          |              | -                                  | -                |
| Comparison    | OPGP195  | 12q21.31 | 12  | 84430223  | 84569268  | 139046    | Loss          |              | -                                  | -                |
| Comparison    | OPGP201  | 12q21.31 | 12  | 84541750  | 84602292  | 60543     | Loss          |              | -                                  | -                |
| Comparison    | OPGP10   | 12q22    | 12  | 91644061  | 91845235  | 201175    | Gain          | Yes          | <i>PLEKHG7; EEAI</i>               | -                |
| Comparison    | OPGP361  | 12q22    | 12  | 91644061  | 91848534  | 204474    | Gain          | Yes          | <i>PLEKHG7; EEAI</i>               | -                |
| Comparison    | OPGP132  | 12q23.3  | 12  | 103201466 | 103224839 | 23374     | Loss          | Yes          | <i>TXNRD1; EID3</i>                | -                |
| Comparison    | OPGP16   | 12q24.23 | 12  | 117963429 | 117983724 | 20296     | Loss          |              | -                                  | -                |

| Sample Status | SampleID | Cytoband | Chr | Start     | End       | Size (bp) | Gain/<br>Loss | Very<br>Rare | Protein-coding Genes in CNV                                                  | miRNAs in<br>CNV                                               |
|---------------|----------|----------|-----|-----------|-----------|-----------|---------------|--------------|------------------------------------------------------------------------------|----------------------------------------------------------------|
| Comparison    | OPGP352  | 12q24.32 | 12  | 125549861 | 125570543 | 20683     | Loss          | -            |                                                                              | -                                                              |
| Comparison    | OPGP319  | 12q24.32 | 12  | 125576252 | 125745397 | 169146    | Gain          | Yes          |                                                                              | -                                                              |
| Comparison    | OPGP16   | 12q24.32 | 12  | 127728669 | 127939053 | 210385    | Gain          | Yes          | <i>TMEM132C; SLC15A4; GLT1D1</i>                                             | -                                                              |
| Comparison    | OPGP19   | 12q24.33 | 12  | 129278320 | 129772780 | 494461    | Gain          | Yes          | <i>PIWIL1; RIMBP2</i>                                                        | -                                                              |
| Comparison    | OPGP1    | 12q24.33 | 12  | 130040458 | 130382165 | 341708    | Gain          | Yes          | <i>GPR133</i>                                                                | -                                                              |
| Comparison    | OPGP147  | 12q24.33 | 12  | 130044192 | 130307008 | 262817    | Gain          | Yes          | <i>GPR133</i>                                                                | -                                                              |
| Comparison    | OPGP147  | 12q24.33 | 12  | 130524700 | 130674102 | 149403    | Gain          | Yes          | -                                                                            | -                                                              |
| Comparison    | OPGP1    | 12q24.33 | 12  | 130528580 | 130674102 | 145523    | Gain          | Yes          | -                                                                            | -                                                              |
| Comparison    | OPGP86   | 13q12.11 | 13  | 19126655  | 19225716  | 99062     | Gain          | Yes          | <i>MPHOSPH8; PSPC1</i>                                                       | -                                                              |
| Comparison    | OPGP175  | 13q12.12 | 13  | 22404072  | 23834987  | 1430916   | Loss          |              | <i>SGCG; SACS; TNFRSF19; MIPEP; CIQTNF9B; CIQTNF9B-AS1; SPATA13; CIQTNF9</i> | hsa-miR-2276-3p; hsa-miR-2276-5p                               |
| Comparison    | OPGP156  | 13q12.12 | 13  | 24170898  | 24227677  | 56780     | Gain          |              | <i>ATP12A</i>                                                                | -                                                              |
| Comparison    | OPGP272  | 13q12.12 | 13  | 24170898  | 24231779  | 60882     | Gain          |              | <i>ATP12A</i>                                                                | -                                                              |
| Comparison    | OPGP228  | 13q12.13 | 13  | 25189176  | 25266951  | 77776     | Gain          | Yes          | <i>ATP8A2</i>                                                                | -                                                              |
| Comparison    | OPGP244  | 13q13.2  | 13  | 34433238  | 34464233  | 30996     | Loss          | Yes          | -                                                                            | -                                                              |
| Comparison    | OPGP189  | 13q14.11 | 13  | 39533644  | 39545764  | 12121     | Loss          | Yes          | -                                                                            | -                                                              |
| Comparison    | OPGP264  | 13q14.11 | 13  | 40307515  | 40374086  | 66572     | Loss          | Yes          | -                                                                            | -                                                              |
| Comparison    | OPGP58   | 13q14.3  | 13  | 49492414  | 50352208  | 859795    | Loss          |              | <i>KCNRG; DLEU7</i>                                                          | hsa-miR-16-5p; hsa-miR-16-1-3p; hsa-miR-15a-5p; hsa-miR-15a-3p |
| Comparison    | OPGP101  | 13q21.1  | 13  | 54041427  | 54374043  | 332617    | Loss          | Yes          | -                                                                            | -                                                              |
| Comparison    | OPGP280  | 13q21.1  | 13  | 55876886  | 55906043  | 29158     | Loss          | Yes          | -                                                                            | -                                                              |
| Comparison    | OPGP276  | 13q21.1  | 13  | 56786597  | 56943790  | 157194    | Gain          | Yes          | -                                                                            | -                                                              |
| Comparison    | OPGP71   | 13q21.31 | 13  | 62292555  | 62322976  | 30422     | Loss          | Yes          | -                                                                            | -                                                              |
| Comparison    | OPGP59   | 13q21.32 | 13  | 64649291  | 65321594  | 672304    | Gain          | Yes          | -                                                                            | -                                                              |
| Comparison    | OPGP255  | 13q21.33 | 13  | 67834884  | 67858955  | 24072     | Loss          |              | -                                                                            | -                                                              |
| Comparison    | OPGP143  | 13q21.33 | 13  | 71110420  | 71128782  | 18363     | Loss          | Yes          | -                                                                            | -                                                              |
| Comparison    | OPGP43   | 13q31.1  | 13  | 79317509  | 79355699  | 38191     | Gain          |              | -                                                                            | -                                                              |
| Comparison    | OPGP328  | 13q31.1  | 13  | 82086075  | 82101299  | 15225     | Gain          |              | -                                                                            | -                                                              |
| Comparison    | OPGP159  | 13q31.1  | 13  | 82086779  | 82101299  | 14521     | Gain          |              | -                                                                            | -                                                              |
| Comparison    | OPGP303  | 13q31.1  | 13  | 83479121  | 83599230  | 120110    | Loss          | Yes          | -                                                                            | -                                                              |



| Sample Status | SampleID | Cytoband            | Chr | Start     | End       | Size (bp) | Gain/<br>Loss | Very<br>Rare | Protein-coding Genes in CNV | miRNAs in<br>CNV |
|---------------|----------|---------------------|-----|-----------|-----------|-----------|---------------|--------------|-----------------------------|------------------|
| Comparison    | OPGP126  | 13q31.1             | 13  | 84707522  | 84735558  | 28037     | Gain          | Yes          | -                           | -                |
| Comparison    | OPGP144  | 13q31.2             | 13  | 88056680  | 88068498  | 11819     | Loss          | Yes          | -                           | -                |
| Comparison    | OPGP296  | 13q31.3             | 13  | 89780507  | 89902445  | 121939    | Loss          | Yes          | -                           | -                |
| Comparison    | OPGP306  | 13q32.3             | 13  | 98598077  | 98702466  | 104390    | Gain          |              | <i>UBAC2</i>                | -                |
| Comparison    | OPGP243  | 13q32.3             | 13  | 99921578  | 100016266 | 94689     | Gain          | Yes          | <i>PCCA; GGACT</i>          | -                |
| Comparison    | OPGP164  | 13q33.2             | 13  | 105084157 | 105146286 | 62130     | Loss          |              | -                           | -                |
| Comparison    | OPGP164  | 13q33.2             | 13  | 105206038 | 105283311 | 77274     | Gain          |              | -                           | -                |
| Comparison    | OPGP253  | 13q33.3             | 13  | 107130075 | 107283351 | 153277    | Loss          | Yes          | -                           | -                |
| Comparison    | OPGP7    | 13q34               | 13  | 109538464 | 109558627 | 20164     | Loss          |              | -                           | -                |
| Comparison    | OPGP365  | 13q34               | 13  | 113543086 | 113654849 | 111764    | Gain          | Yes          | <i>GAS6; TMEM255B</i>       | -                |
| Comparison    | OPGP211  | 14q11.2             | 14  | 21604830  | 21656002  | 51173     | Loss          |              | -                           | -                |
| Comparison    | OPGP211  | 14q11.2             | 14  | 21676812  | 22038836  | 362025    | Loss          |              | -                           | -                |
| Comparison    | OPGP341  | 14q11.2             | 14  | 21683301  | 22041431  | 358131    | Loss          |              | -                           | -                |
| Comparison    | OPGP95   | 14q11.2             | 14  | 21811905  | 21929710  | 117806    | Loss          |              | -                           | -                |
| Comparison    | OPGP183  | 14q11.2             | 14  | 21862983  | 21929710  | 66728     | Loss          |              | -                           | -                |
| Comparison    | OPGP313  | 14q11.2             | 14  | 21867401  | 22030672  | 163272    | Loss          |              | -                           | -                |
| Comparison    | OPGP40   | 14q11.2             | 14  | 21992078  | 22048615  | 56538     | Loss          | Yes          | -                           | -                |
| Comparison    | OPGP95   | 14q11.2             | 14  | 21992078  | 22025556  | 33479     | Loss          | Yes          | -                           | -                |
| Comparison    | OPGP179  | 14q11.2             | 14  | 22327900  | 22352590  | 24691     | Loss          |              | <i>SLC7A7</i>               | -                |
| Comparison    | OPGP152  | 14q12               | 14  | 26537691  | 26631461  | 93771     | Loss          | Yes          | -                           | -                |
| Comparison    | OPGP61   | 14q12               | 14  | 26604502  | 26663956  | 59455     | Loss          |              | -                           | -                |
| Comparison    | OPGP141  | 14q12               | 14  | 27170503  | 27376515  | 206013    | Gain          | Yes          | -                           | hsa-miR-3171     |
| Comparison    | OPGP106  | 14q12               | 14  | 30614595  | 30736869  | 122275    | Gain          | Yes          | <i>AP4S1; HECTD1</i>        | -                |
| Comparison    | OPGP106  | 14q12               | 14  | 31317416  | 31373117  | 55702     | Loss          | Yes          | <i>NUBPL</i>                | -                |
| Comparison    | OPGP340  | 14q13.1             | 14  | 34060194  | 34097259  | 37066     | Loss          | Yes          | <i>EAPP</i>                 | -                |
| Comparison    | OPGP80   | 14q13.3             | 14  | 36418753  | 36428789  | 10037     | Gain          |              | -                           | -                |
| Comparison    | OPGP309  | 14q21.1             | 14  | 38727298  | 38881982  | 154685    | Gain          | Yes          | <i>MIA2; CTAGE5</i>         | -                |
| Comparison    | OPGP202  | 14q21.1             | 14  | 40034310  | 40114168  | 79859     | Loss          | Yes          | -                           | -                |
| Comparison    | OPGP363  | 14q21.2,<br>14q21.1 | 14  | 40885215  | 41054586  | 169372    | Loss          |              | -                           | -                |
| Comparison    | OPGP277  | 14q21.3             | 14  | 44998959  | 45027364  | 28406     | Loss          | Yes          | -                           | -                |
| Comparison    | OPGP299  | 14q21.3             | 14  | 45451570  | 45482761  | 31192     | Gain          | Yes          | -                           | -                |
| Comparison    | OPGP157  | 14q21.3             | 14  | 46165038  | 46175925  | 10888     | Loss          | Yes          | -                           | -                |

| Sample Status | SampleID | Cytoband | Chr | Start     | End       | Size (bp) | Gain/<br>Loss | Very<br>Rare | Protein-coding Genes in CNV | miRNAs in<br>CNV |
|---------------|----------|----------|-----|-----------|-----------|-----------|---------------|--------------|-----------------------------|------------------|
| Comparison    | OPGP221  | 14q22.1  | 14  | 49033143  | 49087041  | 53899     | Loss          | Yes          | -                           | -                |
| Comparison    | OPGP289  | 14q22.1  | 14  | 50085600  | 50246752  | 161153    | Loss          | Yes          | <i>ATL1; SAV1</i>           | -                |
| Comparison    | OPGP9    | 14q22.2  | 14  | 54205175  | 54227726  | 22552     | Gain          | Yes          | -                           | -                |
| Comparison    | OPGP162  | 14q23.2  | 14  | 62587454  | 62624470  | 37017     | Gain          | Yes          | -                           | -                |
| Comparison    | OPGP195  | 14q23.3  | 14  | 66262441  | 66299550  | 37110     | Loss          | Yes          | -                           | -                |
| Comparison    | OPGP264  | 14q23.3  | 14  | 66605185  | 66719847  | 114663    | Gain          | Yes          | <i>GPHN</i>                 | -                |
| Comparison    | OPGP291  | 14q24.2  | 14  | 69969832  | 70009883  | 40052     | Loss          | Yes          | <i>ADAM21</i>               | -                |
| Comparison    | OPGP278  | 14q24.2  | 14  | 70023902  | 70083000  | 59099     | Gain          | Yes          | <i>ADAM20</i>               | -                |
| Comparison    | OPGP201  | 14q31.1  | 14  | 79540616  | 79556292  | 15677     | Loss          | Yes          | -                           | -                |
| Comparison    | OPGP60   | 14q31.3  | 14  | 85617792  | 85641263  | 23472     | Loss          | -            | -                           | -                |
| Comparison    | OPGP221  | 14q31.3  | 14  | 86710968  | 86769895  | 58928     | Loss          | Yes          | -                           | -                |
| Comparison    | OPGP96   | 14q32.2  | 14  | 99426385  | 99465902  | 39518     | Gain          | Yes          | <i>EML1</i>                 | -                |
| Comparison    | OPGP40   | 14q32.33 | 14  | 105265522 | 105366813 | 101292    | Loss          | -            | -                           | -                |
| Comparison    | OPGP45   | 14q32.33 | 14  | 105265522 | 105391431 | 125910    | Loss          | -            | -                           | -                |
| Comparison    | OPGP118  | 14q32.33 | 14  | 105265522 | 105391431 | 125910    | Loss          | -            | -                           | -                |
| Comparison    | OPGP121  | 14q32.33 | 14  | 105265522 | 105391431 | 125910    | Loss          | -            | -                           | -                |
| Comparison    | OPGP220  | 14q32.33 | 14  | 105265522 | 105391431 | 125910    | Loss          | -            | -                           | -                |
| Comparison    | OPGP299  | 14q32.33 | 14  | 105265522 | 105391431 | 125910    | Loss          | -            | -                           | -                |
| Comparison    | OPGP371  | 14q32.33 | 14  | 105265522 | 105391431 | 125910    | Loss          | -            | -                           | -                |
| Comparison    | OPGP2    | 14q32.33 | 14  | 105289630 | 105391431 | 101802    | Loss          | -            | -                           | -                |
| Comparison    | OPGP264  | 14q32.33 | 14  | 105289630 | 105391431 | 101802    | Loss          | -            | -                           | -                |
| Comparison    | OPGP44   | 14q32.33 | 14  | 105295399 | 105391431 | 96033     | Loss          | -            | -                           | -                |
| Comparison    | OPGP304  | 14q32.33 | 14  | 105295399 | 105391431 | 96033     | Loss          | -            | -                           | -                |
| Comparison    | OPGP58   | 14q32.33 | 14  | 105413362 | 105562063 | 148702    | Loss          | -            | -                           | -                |
| Comparison    | OPGP159  | 14q32.33 | 14  | 106216317 | 106276779 | 60463     | Gain          | -            | -                           | -                |
| Comparison    | OPGP134  | 14q32.33 | 14  | 106344954 | 106356482 | 11529     | Gain          | Yes          | -                           | -                |
| Comparison    | OPGP209  | 15q11.2  | 15  | 20801551  | 21230587  | 429037    | Loss          | -            | <i>LOC440243</i>            | -                |
| Comparison    | OPGP284  | 15q11.2  | 15  | 21851447  | 21904021  | 52575     | Loss          | Yes          | -                           | -                |
| Comparison    | OPGP277  | 15q11.2  | 15  | 22643359  | 22666253  | 22895     | Loss          | -            | -                           | -                |
| Comparison    | OPGP128  | 15q11.2  | 15  | 22842849  | 22869179  | 26331     | Gain          | -            | -                           | -                |
| Comparison    | OPGP316  | 15q11.2  | 15  | 22842849  | 22886561  | 43713     | Gain          | -            | -                           | -                |
| Comparison    | OPGP212  | 15q11.2  | 15  | 22968551  | 22993596  | 25046     | Gain          | -            | -                           | -                |
| Comparison    | OPGP248  | 15q11.2  | 15  | 22968551  | 22997449  | 28899     | Gain          | -            | -                           | -                |

| Sample Status | SampleID | Cytoband            | Chr | Start    | End       | Size (bp) | Gain/<br>Loss | Very<br>Rare | Protein-coding Genes in CNV    | miRNAs in<br>CNV |
|---------------|----------|---------------------|-----|----------|-----------|-----------|---------------|--------------|--------------------------------|------------------|
| Comparison    | OPGP70   | 15q11.2             | 15  | 22971085 | 23002661  | 31577     | Gain          | -            | -                              | -                |
| Comparison    | OPGP103  | 15q11.2             | 15  | 22981174 | 22993596  | 12423     | Gain          | -            | -                              | -                |
| Comparison    | OPGP69   | 15q13.3             | 15  | 30291556 | 30318608  | 27053     | Loss          | -            | -                              | -                |
| Comparison    | OPGP288  | 15q13.3             | 15  | 30291556 | 30318608  | 27053     | Loss          | -            | -                              | -                |
| Comparison    | OPGP156  | 15q14               | 15  | 32374931 | 32421325  | 46395     | Loss          | Yes          | <i>SLC12A6</i>                 | -                |
| Comparison    | OPGP138  | 15q14               | 15  | 36983956 | 37176174  | 192219    | Gain          | Yes          | -                              | -                |
| Comparison    | OPGP210  | 15q21.1             | 15  | 44632396 | 44745152  | 112757    | Loss          | -            | -                              | -                |
| Comparison    | OPGP74   | 15q21.1             | 15  | 45962099 | 45979698  | 17600     | Gain          | -            | -                              | -                |
| Comparison    | OPGP341  | 15q21.3             | 15  | 53998357 | 54225066  | 226710    | Gain          | Yes          | <i>NEDD4; RFX7</i>             | -                |
| Comparison    | OPGP8    | 15q22.2             | 15  | 59034061 | 59050669  | 16609     | Loss          | Yes          | -                              | -                |
| Comparison    | OPGP255  | 15q23               | 15  | 69022959 | 69224764  | 201806    | Gain          | Yes          | <i>LRRC49; CT62; THSD4</i>     | -                |
| Comparison    | OPGP13   | 15q23               | 15  | 69403515 | 69423875  | 20361     | Loss          | -            | -                              | -                |
| Comparison    | OPGP342  | 15q24.3             | 15  | 75293482 | 75356376  | 62895     | Loss          | Yes          | -                              | -                |
| Comparison    | OPGP147  | 15q25.1,<br>15q24.3 | 15  | 75819762 | 76127594  | 307833    | Gain          | Yes          | <i>TBC1D2B</i>                 | -                |
| Comparison    | OPGP142  | 15q25.1             | 15  | 79154864 | 79169669  | 14806     | Loss          | Yes          | -                              | -                |
| Comparison    | OPGP57   | 15q25.1             | 15  | 79334232 | 79344892  | 10661     | Loss          | Yes          | <i>IL16</i>                    | -                |
| Comparison    | OPGP214  | 15q25.2             | 15  | 82886489 | 82982104  | 95616     | Gain          | Yes          | <i>ZSCAN2</i>                  | -                |
| Comparison    | OPGP242  | 15q25.3             | 15  | 83336499 | 83496203  | 159705    | Loss          | Yes          | <i>PDE8A</i>                   | -                |
| Comparison    | OPGP321  | 15q25.3             | 15  | 83688662 | 83715490  | 26829     | Loss          | Yes          | -                              | -                |
| Comparison    | OPGP311  | 15q26.1             | 15  | 90565432 | 90576621  | 11190     | Loss          | Yes          | -                              | -                |
| Comparison    | OPGP232  | 15q26.1             | 15  | 91740596 | 91852025  | 111430    | Loss          | Yes          | -                              | -                |
| Comparison    | OPGP14   | 15q26.2             | 15  | 92825093 | 92839086  | 13994     | Loss          | -            | -                              | -                |
| Comparison    | OPGP128  | 15q26.3             | 15  | 97167880 | 97202432  | 34553     | Loss          | Yes          | -                              | -                |
| Comparison    | OPGP264  | 15q26.3             | 15  | 97908966 | 97932653  | 23688     | Loss          | Yes          | -                              | -                |
| Comparison    | OPGP230  | 15q26.3             | 15  | 98510305 | 98523873  | 13569     | Loss          | Yes          | <i>ADAMTS17</i>                | -                |
| Comparison    | OPGP124  | 15q26.3             | 15  | 98751652 | 98906792  | 155141    | Gain          | Yes          | <i>CERS3</i>                   | -                |
| Comparison    | OPGP13   | 15q26.3             | 15  | 99970111 | 100033288 | 63178     | Loss          | Yes          | <i>TM2D3; TARSL2</i>           | -                |
| Comparison    | OPGP37   | 16p13.3             | 16  | 160326   | 181309    | 20984     | Gain          | Yes          | <i>HBA2; HBA1; HBQ1; LUC7L</i> | -                |
| Comparison    | OPGP99   | 16p13.3             | 16  | 4526971  | 4589721   | 62751     | Loss          | Yes          | <i>C16orf96</i>                | -                |
| Comparison    | OPGP338  | 16p13.3             | 16  | 5403914  | 5419169   | 15256     | Loss          | Yes          | -                              | -                |
| Comparison    | OPGP169  | 16p13.2             | 16  | 6565423  | 6610859   | 45437     | Loss          | -            | -                              | -                |
| Comparison    | OPGP236  | 16p13.2             | 16  | 6814660  | 6918847   | 104188    | Loss          | -            | -                              | -                |

| Sample Status | SampleID | Cytoband            | Chr | Start    | End      | Size (bp) | Gain/<br>Loss | Very<br>Rare | Protein-coding Genes in CNV | miRNAs in<br>CNV                 |
|---------------|----------|---------------------|-----|----------|----------|-----------|---------------|--------------|-----------------------------|----------------------------------|
| Comparison    | OPGP261  | 16p13.2             | 16  | 6856452  | 7021149  | 164698    | Loss          | -            |                             | -                                |
| Comparison    | OPGP194  | 16p13.2             | 16  | 6875284  | 6927498  | 52215     | Loss          | -            |                             | -                                |
| Comparison    | OPGP362  | 16p13.2             | 16  | 6908730  | 6981470  | 72741     | Loss          | -            |                             | -                                |
| Comparison    | OPGP144  | 16p13.2             | 16  | 8527689  | 8545987  | 18299     | Loss          | Yes          |                             | -                                |
| Comparison    | OPGP197  | 16p13.2             | 16  | 8642807  | 8738327  | 95521     | Gain          |              | <i>METTL22; ABAT</i>        | -                                |
| Comparison    | OPGP226  | 16p13.13            | 16  | 11541247 | 11558388 | 17142     | Loss          | Yes          | <i>LITAF</i>                | -                                |
| Comparison    | OPGP198  | 16p13.12            | 16  | 14164051 | 14189983 | 25933     | Gain          | Yes          |                             | -                                |
| Comparison    | OPGP265  | 16p13.12            | 16  | 14446561 | 14494322 | 47762     | Gain          | Yes          | <i>PARN</i>                 | -                                |
| Comparison    | OPGP157  | 16p12.3             | 16  | 18464221 | 18540917 | 76697     | Loss          |              | <i>NOMO2</i>                | -                                |
| Comparison    | OPGP341  | 16p12.3             | 16  | 20420282 | 20453353 | 33072     | Loss          | -            |                             | -                                |
| Comparison    | OPGP223  | 16p12.1,<br>16p11.2 | 16  | 27432463 | 27651834 | 219372    | Gain          |              | <i>GTF3C1; KIAA0556</i>     | -                                |
| Comparison    | OPGP166  | 16p11.2             | 16  | 32496122 | 32522419 | 26298     | Gain          | -            |                             | -                                |
| Comparison    | OPGP243  | 16p11.2             | 16  | 32496122 | 32522419 | 26298     | Gain          | -            |                             | -                                |
| Comparison    | OPGP247  | 16p11.2             | 16  | 32496122 | 32522419 | 26298     | Gain          | -            |                             | -                                |
| Comparison    | OPGP275  | 16p11.2             | 16  | 32496402 | 32522407 | 26006     | Gain          | -            |                             | -                                |
| Comparison    | OPGP183  | 16q12.1             | 16  | 46980147 | 47071325 | 91179     | Gain          | Yes          |                             | -                                |
| Comparison    | OPGP255  | 16q12.2             | 16  | 54196274 | 54374206 | 177933    | Gain          | Yes          | <i>SLC6A2</i>               | -                                |
| Comparison    | OPGP224  | 16q21               | 16  | 61976815 | 61993809 | 16995     | Loss          | Yes          |                             | -                                |
| Comparison    | OPGP150  | 16q22.3             | 16  | 69977549 | 70012760 | 35212     | Gain          | Yes          | <i>CALB2</i>                | -                                |
| Comparison    | OPGP329  | 16q22.3             | 16  | 70996201 | 71100367 | 104167    | Loss          | Yes          |                             | -                                |
| Comparison    | OPGP270  | 16q22.3             | 16  | 71116930 | 71131985 | 15056     | Loss          | Yes          |                             | -                                |
| Comparison    | OPGP164  | 16q23.1             | 16  | 74200364 | 74212427 | 12064     | Loss          | Yes          | <i>ADATI</i>                | -                                |
| Comparison    | OPGP51   | 16q23.1             | 16  | 74524271 | 74567316 | 43046     | Loss          | Yes          |                             | -                                |
| Comparison    | OPGP104  | 16q23.1             | 16  | 75794611 | 75834791 | 40181     | Loss          |              | <i>SYCE1L</i>               | -                                |
| Comparison    | OPGP6    | 16q23.1             | 16  | 75804807 | 75879491 | 74685     | Loss          | Yes          | <i>ADAMTS18</i>             | -                                |
| Comparison    | OPGP61   | 16q23.1             | 16  | 76602626 | 76674452 | 71827     | Loss          |              | <i>CLEC3A</i>               | -                                |
| Comparison    | OPGP56   | 16q23.2             | 16  | 79508646 | 79557426 | 48781     | Loss          | Yes          |                             | -                                |
| Comparison    | OPGP64   | 16q23.3             | 16  | 80661587 | 80676273 | 14687     | Loss          | Yes          | <i>HSD17B2</i>              | -                                |
| Comparison    | OPGP162  | 16q23.3             | 16  | 81545526 | 81604208 | 58683     | Loss          | Yes          |                             | -                                |
| Comparison    | OPGP56   | 16q24.1             | 16  | 84327816 | 84349401 | 21586     | Loss          | -            |                             | hsa-miR-1910-5p; hsa-miR-1910-3p |

| Sample Status | SampleID | Cytoband          | Chr | Start    | End      | Size (bp) | Gain/<br>Loss | Very<br>Rare | Protein-coding Genes in CNV                                    | miRNAs in<br>CNV                         |
|---------------|----------|-------------------|-----|----------|----------|-----------|---------------|--------------|----------------------------------------------------------------|------------------------------------------|
| Comparison    | OPGP256  | 16q24.1           | 16  | 84802018 | 84814714 | 12697     | Loss          | Yes          | -                                                              | -                                        |
| Comparison    | OPGP252  | 16q24.1           | 16  | 84837516 | 84867945 | 30430     | Loss          | Yes          | -                                                              | -                                        |
| Comparison    | OPGP24   | 16q24.1           | 16  | 85030259 | 85049728 | 19470     | Gain          | Yes          | -                                                              | -                                        |
| Comparison    | OPGP301  | 16q24.2           | 16  | 86322658 | 86340352 | 17695     | Loss          | Yes          | <i>KLHDC4</i>                                                  | -                                        |
| Comparison    | OPGP177  | 17p13.3           | 17  | 514903   | 534011   | 19109     | Loss          | Yes          | -                                                              | -                                        |
| Comparison    | OPGP209  | 17p13.3           | 17  | 659882   | 1055525  | 395644    | Loss          | Yes          | <i>ABR; NXN; TIMM22</i>                                        | hsa-miR-3183                             |
| Comparison    | OPGP229  | 17p13.3           | 17  | 681792   | 731386   | 49595     | Gain          |              | <i>NXN</i>                                                     | -                                        |
| Comparison    | OPGP242  | 17p12             | 17  | 13119162 | 13175561 | 56400     | Gain          |              | -                                                              | -                                        |
| Comparison    | OPGP167  | 17p11.2           | 17  | 15810282 | 16058587 | 248306    | Gain          | Yes          | <i>ADORA2B; ZSWIM7; TTC19; NCOR1</i>                           | -                                        |
| Comparison    | OPGP319  | 17p11.2           | 17  | 19911470 | 19926019 | 14550     | Loss          | Yes          | -                                                              | -                                        |
| Comparison    | OPGP312  | 17q21.1,<br>17q12 | 17  | 35306091 | 35439280 | 133190    | Gain          | Yes          | <i>GSDMB; ORMDL3; LRRC3C; GSDMA;<br/>PSMD3; CSF3; MED24</i>    | hsa-miR-6884-<br>5p; hsa-miR-<br>6884-3p |
| Comparison    | OPGP239  | 17q21.32          | 17  | 42833610 | 42848983 | 15374     | Loss          |              | <i>EFCAB13</i>                                                 | -                                        |
| Comparison    | OPGP227  | 17q21.33          | 17  | 45187116 | 45212702 | 25587     | Loss          | Yes          | <i>FAM117A</i>                                                 | -                                        |
| Comparison    | OPGP256  | 17q22             | 17  | 47968877 | 48021056 | 52180     | Loss          |              | -                                                              | -                                        |
| Comparison    | OPGP62   | 17q22             | 17  | 49286499 | 49375343 | 88845     | Loss          | Yes          | -                                                              | -                                        |
| Comparison    | OPGP35   | 17q22             | 17  | 50229035 | 50249835 | 20801     | Gain          | Yes          | -                                                              | -                                        |
| Comparison    | OPGP134  | 17q22             | 17  | 54590260 | 54852540 | 262281    | Gain          |              | <i>PRR11; SMG8; GDPD1; YPEL2</i>                               | hsa-miR-4729                             |
| Comparison    | OPGP273  | 17q23.2           | 17  | 57877404 | 57949222 | 71819     | Gain          |              | <i>METTL2A; TLK2</i>                                           | -                                        |
| Comparison    | OPGP293  | 17q23.3           | 17  | 58410367 | 58446485 | 36119     | Gain          |              | <i>TANC2</i>                                                   | -                                        |
| Comparison    | OPGP181  | 17q23.3           | 17  | 59290481 | 59356661 | 66181     | Loss          |              | <i>CSH2; GH2; CSH1; CSHL1; GH1</i>                             | -                                        |
| Comparison    | OPGP28   | 17q24.2           | 17  | 61841258 | 61916742 | 75485     | Loss          |              | -                                                              | -                                        |
| Comparison    | OPGP69   | 17q24.2           | 17  | 62816676 | 62829597 | 12922     | Loss          |              | -                                                              | -                                        |
| Comparison    | OPGP343  | 17q25.1           | 17  | 71898039 | 71934237 | 36199     | Gain          | Yes          | <i>UBE2O</i>                                                   | -                                        |
| Comparison    | OPGP349  | 18p11.32          | 18  | 160441   | 210599   | 50159     | Gain          | Yes          | <i>USP14; THOC1</i>                                            | -                                        |
| Comparison    | OPGP318  | 18p11.32          | 18  | 311430   | 332512   | 21083     | Loss          | Yes          | <i>COLEC12</i>                                                 | -                                        |
| Comparison    | OPGP337  | 18p11.32          | 18  | 378110   | 723966   | 345857    | Gain          |              | <i>COLEC12; CETN1; CLUL1; TYMS;<br/>C18orf56; ENOSF1; YES1</i> | -                                        |
| Comparison    | OPGP234  | 18p11.31          | 18  | 2974448  | 2988950  | 14503     | Loss          | Yes          | -                                                              | -                                        |
| Comparison    | OPGP302  | 18p11.31          | 18  | 4404354  | 4641535  | 237182    | Gain          | Yes          | -                                                              | -                                        |
| Comparison    | OPGP279  | 18p11.23          | 18  | 7213705  | 7427868  | 214164    | Gain          | Yes          | <i>LRRC30</i>                                                  | -                                        |
| Comparison    | OPGP141  | 18p11.23          | 18  | 7997252  | 8015176  | 17925     | Loss          | Yes          | -                                                              | -                                        |

| Sample Status | SampleID | Cytoband             | Chr | Start    | End      | Size (bp) | Gain/<br>Loss | Very<br>Rare | Protein-coding Genes in CNV   | miRNAs in<br>CNV |
|---------------|----------|----------------------|-----|----------|----------|-----------|---------------|--------------|-------------------------------|------------------|
| Comparison    | OPGP276  | 18p11.21             | 18  | 12510514 | 12523241 | 12728     | Loss          | Yes          | -                             | -                |
| Comparison    | OPGP202  | 18q11.1              | 18  | 16783351 | 16878247 | 94897     | Gain          | Yes          | <i>ROCK1</i>                  | -                |
| Comparison    | OPGP276  | 18q11.2              | 18  | 21754916 | 21790936 | 36021     | Loss          | Yes          | -                             | -                |
| Comparison    | OPGP285  | 18q12.1              | 18  | 23510400 | 23916848 | 406449    | Gain          | Yes          | <i>CDH2</i>                   | -                |
| Comparison    | OPGP271  | 18q12.1              | 18  | 27991040 | 28018557 | 27518     | Gain          | Yes          | -                             | -                |
| Comparison    | OPGP223  | 18q12.2              | 18  | 33521263 | 33531846 | 10584     | Loss          | Yes          | -                             | -                |
| Comparison    | OPGP315  | 18q21.2              | 18  | 47146846 | 47209177 | 62332     | Gain          | Yes          | -                             | -                |
| Comparison    | OPGP132  | 18q21.2              | 18  | 49439197 | 49450886 | 11690     | Loss          | -            | -                             | -                |
| Comparison    | OPGP254  | 18q21.2              | 18  | 49439197 | 49450886 | 11690     | Loss          | -            | -                             | -                |
| Comparison    | OPGP167  | 18q21.31             | 18  | 53047911 | 53074975 | 27065     | Loss          | Yes          | -                             | -                |
| Comparison    | OPGP114  | 18q22.1              | 18  | 60268246 | 60425300 | 157055    | Gain          | -            | -                             | -                |
| Comparison    | OPGP25   | 18q22.1              | 18  | 60276090 | 60420251 | 144162    | Gain          | -            | -                             | -                |
| Comparison    | OPGP104  | 18q22.2              | 18  | 65832070 | 66021008 | 188939    | Loss          | Yes          | <i>RTTN</i>                   | -                |
| Comparison    | OPGP112  | 18q22.3              | 18  | 69281483 | 69311825 | 30343     | Loss          | Yes          | -                             | -                |
| Comparison    | OPGP183  | 18q23                | 18  | 72565690 | 72600290 | 34601     | Loss          | Yes          | -                             | -                |
| Comparison    | OPGP303  | 18q23                | 18  | 73453193 | 73510172 | 56980     | Loss          | Yes          | -                             | -                |
| Comparison    | OPGP121  | 19p13.3              | 19  | 2356116  | 2367945  | 11830     | Loss          | -            | <i>TMPRSS9</i>                | -                |
| Comparison    | OPGP171  | 19p13.11             | 19  | 18622276 | 18653925 | 31650     | Gain          | Yes          | <i>KLHL26</i>                 | -                |
| Comparison    | OPGP52   | 19p12                | 19  | 20133203 | 20162646 | 29444     | Gain          | Yes          | <i>ZNF486</i>                 | -                |
| Comparison    | OPGP93   | 19p12                | 19  | 23781659 | 23892043 | 110385    | Gain          | Yes          | <i>ZNF726</i>                 | -                |
| Comparison    | OPGP184  | 19q12                | 19  | 33790946 | 33816349 | 25404     | Loss          | Yes          | -                             | -                |
| Comparison    | OPGP365  | 19q12                | 19  | 34619105 | 34690833 | 71729     | Gain          | Yes          | -                             | -                |
| Comparison    | OPGP228  | 19q13.2,<br>19q13.31 | 19  | 47781613 | 47867134 | 85522     | Loss          | Yes          | <i>CEACAM8</i>                | -                |
| Comparison    | OPGP209  | 19q13.31             | 19  | 48281291 | 48381390 | 100100    | Loss          | -            | <i>PSG5</i>                   | -                |
| Comparison    | OPGP27   | 19q13.33             | 19  | 55816543 | 55888141 | 71599     | Gain          | Yes          | <i>SYT3; C19orf81; SHANK1</i> | -                |
| Comparison    | OPGP264  | 19q13.33             | 19  | 56834164 | 56846717 | 12554     | Loss          | -            | <i>SIGLEC14</i>               | -                |
| Comparison    | OPGP326  | 19q13.33             | 19  | 56834164 | 56846717 | 12554     | Loss          | -            | <i>SIGLEC14</i>               | -                |
| Comparison    | OPGP276  | 19q13.41             | 19  | 58291334 | 58320465 | 29132     | Gain          | -            | <i>ZNF415</i>                 | -                |
| Comparison    | OPGP123  | 19q13.41             | 19  | 58556242 | 58588445 | 32204     | Gain          | Yes          | -                             | -                |
| Comparison    | OPGP149  | 19q13.42             | 19  | 59520820 | 59545647 | 24828     | Loss          | Yes          | <i>LILRA4</i>                 | -                |
| Comparison    | OPGP99   | 19q13.42             | 19  | 59795415 | 59809329 | 13915     | Loss          | -            | <i>LILRA1</i>                 | -                |
| Comparison    | OPGP357  | 19q13.42             | 19  | 59843208 | 59868103 | 24896     | Gain          | -            | <i>LILRB4</i>                 | hsa-miR-8061     |

| Sample Status | SampleID | Cytoband             | Chr | Start    | End      | Size (bp) | Gain/<br>Loss | Very<br>Rare | Protein-coding Genes in CNV                                                                   | miRNAs in<br>CNV |
|---------------|----------|----------------------|-----|----------|----------|-----------|---------------|--------------|-----------------------------------------------------------------------------------------------|------------------|
| Comparison    | OPGP10   | 19q13.42             | 19  | 60695892 | 60726887 | 30996     | Gain          |              | <i>SSC5D</i>                                                                                  | -                |
| Comparison    | OPGP213  | 19q13.43             | 19  | 62159732 | 62171294 | 11563     | Loss          |              | -                                                                                             | -                |
| Comparison    | OPGP292  | 19q13.43             | 19  | 62822038 | 62850702 | 28665     | Gain          |              | <i>ZNF134; ZNF211</i>                                                                         | -                |
| Comparison    | OPGP252  | 20p13                | 20  | 808802   | 1099029  | 290228    | Gain          | Yes          | <i>PSMF1; ANGPT4; RSPO4</i>                                                                   | -                |
| Comparison    | OPGP150  | 20p12.3              | 20  | 5882566  | 5998478  | 115913    | Gain          | Yes          | <i>MCM8; CRLS1; LRRN4</i>                                                                     | -                |
| Comparison    | OPGP82   | 20p12.3              | 20  | 6096050  | 6112780  | 16731     | Loss          | Yes          | -                                                                                             | -                |
| Comparison    | OPGP308  | 20p12.3              | 20  | 6359203  | 6369380  | 10178     | Gain          | Yes          | -                                                                                             | -                |
| Comparison    | OPGP207  | 20p12.3              | 20  | 7588629  | 7618194  | 29566     | Loss          | Yes          | -                                                                                             | -                |
| Comparison    | OPGP73   | 20p12.3              | 20  | 8354002  | 8364213  | 10212     | Loss          | Yes          | -                                                                                             | -                |
| Comparison    | OPGP122  | 20p12.3              | 20  | 8583927  | 8850689  | 266763    | Gain          | Yes          | <i>PLCB1</i>                                                                                  | -                |
| Comparison    | OPGP286  | 20p12.1              | 20  | 14810804 | 14824100 | 13297     | Loss          |              | -                                                                                             | -                |
| Comparison    | OPGP369  | 20p12.1              | 20  | 14985034 | 15005685 | 20652     | Loss          |              | -                                                                                             | -                |
| Comparison    | OPGP186  | 20p12.1              | 20  | 15215722 | 15250374 | 34653     | Gain          |              | -                                                                                             | -                |
| Comparison    | OPGP170  | 20p11.21             | 20  | 23193270 | 23220469 | 27200     | Gain          | Yes          | -                                                                                             | -                |
| Comparison    | OPGP10   | 20p11.21             | 20  | 25116159 | 25150508 | 34350     | Loss          | Yes          | <i>ENTPD6</i>                                                                                 | -                |
| Comparison    | OPGP133  | 20p11.1,<br>20p11.21 | 20  | 25622050 | 25758321 | 136272    | Gain          |              | -<br><i>DEFB115; DEFB116; DEFB118; DEFB119;<br/>DEFB121; DEFB123; DEFB124; REM1;<br/>HMI3</i> | -                |
| Comparison    | OPGP43   | 20q11.21             | 20  | 29298710 | 29570401 | 271692    | Gain          |              | <i>DEFB115; DEFB116; DEFB118; DEFB119</i>                                                     | -                |
| Comparison    | OPGP325  | 20q11.21             | 20  | 29298710 | 29446231 | 147522    | Gain          | Yes          | <i>DEFB115; DEFB116; DEFB118; DEFB119</i>                                                     | -                |
| Comparison    | OPGP364  | 20q11.21             | 20  | 29334284 | 29359773 | 25490     | Loss          | Yes          | <i>DEFB116</i>                                                                                | -                |
| Comparison    | OPGP232  | 20q13.12             | 20  | 42279080 | 42296207 | 17128     | Loss          | Yes          | -                                                                                             | -                |
| Comparison    | OPGP208  | 20q13.12             | 20  | 44909981 | 44920224 | 10244     | Loss          | Yes          | -                                                                                             | -                |
| Comparison    | OPGP50   | 20q13.13             | 20  | 47584756 | 47610582 | 25827     | Loss          |              | <i>PTGIS</i>                                                                                  | -                |
| Comparison    | OPGP79   | 20q13.13             | 20  | 48265623 | 48284599 | 18977     | Gain          | Yes          | -                                                                                             | -                |
| Comparison    | OPGP36   | 20q13.31             | 20  | 54839918 | 54867252 | 27335     | Loss          |              | -                                                                                             | -                |
| Comparison    | OPGP132  | 20q13.31             | 20  | 54839918 | 54860758 | 20841     | Loss          |              | -                                                                                             | -                |
| Comparison    | OPGP213  | 21q21.1              | 21  | 17738094 | 18003248 | 265155    | Gain          | Yes          | <i>CXADR; BTG3</i>                                                                            | -                |
| Comparison    | OPGP97   | 21q21.1              | 21  | 20190121 | 20374791 | 184671    | Loss          | Yes          | -                                                                                             | -                |
| Comparison    | OPGP159  | 21q21.1              | 21  | 21493932 | 21545328 | 51397     | Loss          | Yes          | -                                                                                             | -                |
| Comparison    | OPGP41   | 21q21.1              | 21  | 22534973 | 22573005 | 38033     | Loss          | Yes          | -                                                                                             | -                |
| Comparison    | OPGP115  | 21q21.2              | 21  | 23169797 | 23220091 | 50295     | Loss          | Yes          | -                                                                                             | -                |

| Sample Status | SampleID | Cytoband              | Chr | Start    | End      | Size (bp) | Gain/<br>Loss | Very<br>Rare | Protein-coding Genes in CNV          | miRNAs in<br>CNV                         |
|---------------|----------|-----------------------|-----|----------|----------|-----------|---------------|--------------|--------------------------------------|------------------------------------------|
| Comparison    | OPGP39   | 21q21.2               | 21  | 23196562 | 23232190 | 35629     | Loss          | Yes          | -                                    | -                                        |
| Comparison    | OPGP301  | 21q22.11              | 21  | 34230168 | 34268175 | 38008     | Loss          | Yes          | -                                    | -                                        |
| Comparison    | OPGP91   | 21q22.13              | 21  | 37320548 | 37401155 | 80608     | Gain          | Yes          | <i>PIGP; TTC3</i>                    | -                                        |
| Comparison    | OPGP207  | 21q22.3               | 21  | 43014698 | 43025706 | 11009     | Gain          | Yes          | <i>PDE9A</i>                         | -                                        |
| Comparison    | OPGP158  | 21q22.3               | 21  | 45914903 | 45999580 | 84678     | Loss          |              | -                                    | -                                        |
| Comparison    | OPGP202  | 22q11.1               | 22  | 15244898 | 15380277 | 135380    | Gain          |              | -                                    | -                                        |
| Comparison    | OPGP297  | 22q11.21              | 22  | 16783629 | 16875947 | 92319     | Gain          | Yes          | -                                    | hsa-miR-648                              |
| Comparison    | OPGP268  | 22q11.21              | 22  | 17386126 | 17410722 | 24597     | Gain          |              | <i>DGCR2</i>                         | -                                        |
| Comparison    | OPGP204  | 22q11.21              | 22  | 18138816 | 18251778 | 112963    | Loss          | Yes          | <i>TBX1; GNB1L; C22orf29; TXNRD2</i> | -                                        |
| Comparison    | OPGP58   | 22q11.22              | 22  | 21279648 | 21553233 | 273586    | Loss          |              | <i>GGTLC2</i>                        | hsa-miR-650                              |
| Comparison    | OPGP199  | 22q11.23              | 22  | 22475809 | 22613015 | 137207    | Gain          | Yes          | <i>SMARCB1; DERL3; SLC2A11; MIF</i>  | -                                        |
| Comparison    | OPGP216  | 22q11.23              | 22  | 22501305 | 22601745 | 100441    | Gain          | Yes          | <i>SMARCB1; DERL3; SLC2A11; MIF</i>  | -                                        |
| Comparison    | OPGP98   | 22q12.2               | 22  | 28616197 | 28678686 | 62490     | Loss          | Yes          | -                                    | -                                        |
| Comparison    | OPGP353  | 22q12.2               | 22  | 28660459 | 28691881 | 31423     | Loss          |              | -                                    | -                                        |
| Comparison    | OPGP88   | 22q12.2               | 22  | 30259132 | 30274347 | 15216     | Loss          | Yes          | <i>SFII</i>                          | -                                        |
| Comparison    | OPGP344  | 22q12.3               | 22  | 30689003 | 30794362 | 105360    | Gain          | Yes          | <i>SLC5A1</i>                        | -                                        |
| Comparison    | OPGP111  | 22q12.3               | 22  | 30798490 | 30856639 | 58150     | Gain          | Yes          | <i>SLC5A1</i>                        | -                                        |
| Comparison    | OPGP111  | 22q12.3               | 22  | 30889295 | 31109924 | 220630    | Gain          |              | <i>RFPL2; SLC5A4; RFPL3</i>          | -                                        |
| Comparison    | OPGP60   | 22q12.3               | 22  | 34879640 | 34900774 | 21135     | Gain          | Yes          | <i>APOL3</i>                         | -                                        |
| Comparison    | OPGP288  | 22q12.3               | 22  | 35500861 | 35512627 | 11767     | Loss          | Yes          | <i>IFT27</i>                         | -                                        |
| Comparison    | OPGP324  | 22q13.31              | 22  | 46835442 | 46857005 | 21564     | Gain          | Yes          | -                                    | -                                        |
| Comparison    | OPGP355  | 22q13.32              | 22  | 47529950 | 47981564 | 451615    | Gain          | Yes          | <i>FAM19A5</i>                       | hsa-miR-4535                             |
| Comparison    | OPGP249  | 22q13.32              | 22  | 47653943 | 47733961 | 80019     | Gain          | Yes          | -                                    | -                                        |
| Comparison    | OPGP249  | 22q13.32,<br>22q13.33 | 22  | 48117741 | 48471735 | 353995    | Gain          |              | -                                    | hsa-miR-3667-<br>5p; hsa-miR-<br>3667-3p |



## Supplemental References

1. Silversides CK, Lionel AC, Costain G, Merico D, Migita O, Liu B, *et al.* (2012): Rare copy number variations in adults with tetralogy of Fallot implicate novel risk gene pathways. *PLoS Genet.* 8:e1002843.
2. Costain G, Lionel AC, Merico D, Forsythe P, Russell K, Lowther C, *et al.* (2013): Pathogenic rare copy number variants in community-based schizophrenia suggest a potential role for clinical microarrays. *Hum Mol Genet.* 22:4485-4501.
3. Andrulis IL, Boyd NF, Sutherland H (1997): New Ontario familial breast cancer registry to facilitate genetic and epidemiologic studies. *Can Fam Physician.* 43:949-950.
4. Cotterchio M, McKeown-Eyssen G, Sutherland H, Buchan G, Aronson M, Easson AM, *et al.* (2000): Ontario familial colon cancer registry: methods and first-year response rates. *Chronic Dis Can.* 21:81-86.
5. Pinto D, Darvishi K, Shi X, Rajan D, Rigler D, Fitzgerald T, *et al.* (2011): Comprehensive assessment of array-based platforms and calling algorithms for detection of copy number variants. *Nat Biotechnol.* 29:512-520.
6. Scherer SW, Lee C, Birney E, Altshuler DM, Eichler EE, Carter NP, *et al.* (2007): Challenges and standards in integrating surveys of structural variation. *Nat Genet.* 39:S7-15.
7. Pritchard JK (2001): Are rare variants responsible for susceptibility to complex diseases? *Am J Hum Genet.* 69:124-137.
8. Pemberton TJ, Wang C, Li JZ, Rosenberg NA (2010): Inference of unexpected genetic relatedness among individuals in HapMap Phase III. *Am J Hum Genet.* 87:457-464.
9. Purcell S, Neale B, Todd-Brown K, Thomas L, Ferreira MA, Bender D, *et al.* (2007): PLINK: a tool set for whole-genome association and population-based linkage analyses. *Am J Hum Genet.* 81:559-575.
10. Lionel AC, Crosbie J, Barbosa N, Goodale T, Thiruvahindrapuram B, Rickaby J, *et al.* (2011): Rare copy number variation discovery and cross-disorder comparisons identify risk genes for ADHD. *Sci Transl Med.* 3:95ra75.
11. Korn JM, Kuruvilla FG, McCarroll SA, Wysoker A, Nemesh J, Cawley S, *et al.* (2008): Integrated genotype calling and association analysis of SNPjks, common copy number polymorphisms and rare CNVs. *Nat Genet.* 40:1253-1260.
12. Marshall CR, Noor A, Vincent JB, Lionel AC, Feuk L, Skaug J, *et al.* (2008): Structural variation of chromosomes in autism spectrum disorder. *Am J Hum Genet.* 82:477-488.

13. Pinto D, Pagnamenta AT, Klei L, Anney R, Merico D, Regan R, *et al.* (2010): Functional impact of global rare copy number variation in autism spectrum disorders. *Nature*. 466:368-372.
14. Feuk L, Kalervo A, Lipsanen-Nyman M, Skaug J, Nakabayashi K, Finucane B, *et al.* (2006): Absence of a paternally inherited FOXP2 gene in developmental verbal dyspraxia. *Am J Hum Genet*. 79:965-972.
